# Supplementary material
Source: PubMed Central journal article supplement (PMC5878964)
Supplement: NIHMS904654-supplement-supplement_1.pdf [file NIHMS904654-supplement-supplement_1.pdf]

**SUPPLEMENTARY MATERIAL****Appendix 1****Appendix 2****Appendix References**

**Supplementary Figure 1:** Multidimensional scaling analysis of all U.S. ~~pediatric-onset-MS~~ ~~eases~~POMS cases and U.S. white controls

**Supplementary Figure 2:** Average wGRS of POMS and adult-onset MS cases and controls in the U.S. and Sweden

**Supplementary Table 1:** Characteristics of adult-onset MS cases in the U.S. and Sweden

**Supplementary Table 2:** Individual MS risk variant results for U.S., Sweden and meta-analysis (Excel file)

**Supplementary Table 3:** MHC meta-analyses unadjusted and adjusted for *HLA-DRB1\*15:01* and *HLA-A\*02* (Excel file)

**Supplementary Table 4:** Comparisons of ~~pediatric-onset-MS~~POMS cases based on method of ascertainment

Formatted: Line spacing: 1.5 lines

## Appendix 1

### Network of Pediatric Multiple Sclerosis Centers Co-investigators:

Jennifer Graves, MD, PhD (Department of Neurology, University of California, San Francisco, Center Co-Director), Tanuja Chitnis, MD (Partners Pediatric Multiple Sclerosis Center, Massachusetts General Hospital for Children, Center Director), Amy Waldman, MD (Department of Neurology, University of Pennsylvania, Site Investigator), Timothy Loetze, MD (Blue Bird Circle Multiple Sclerosis Center, Baylor College of Medicine, Center Director), Teri Schreiner, MD (Children's Hospital Colorado, University of Colorado, Center Director), Anita Belman, MD (Lourie Center for Pediatric MS, Stony Brook Children's Hospital, Site Investigator), Benjamin Greenberg, MD (Department of Neurology, UT Southwestern, Site Investigator), Bianca Weinstock-Guttman, MD (Pediatric Multiple Sclerosis Center, Jacobs Neurological Institute, Center Director), Gregory Aaen, MD (Pediatric MS Center at Loma Linda University Children's Hospital, Center Director), Jan M Tillema, MD (Mayo Clinic's Pediatric MS Center, Center Director), Janace Hart, BA (University of California, San Francisco, Regional Pediatric MS Center, Center Coordinator), Stacy Caillier, BS (University of California, San Francisco, Regional Pediatric MS Center, Center Coordinator), Jayne Ness, MD (University of Alabama Center for Pediatric-onset Demyelinating Disease, Children's Hospital of Alabama, Center Director), Yolanda Harris, NP (University of Alabama Center for Pediatric-onset Demyelinating Disease, Children's Hospital of Alabama, Site Coordinator), Jennifer Rubin, MD (Department of Pediatric Neurology, Northwestern Feinberg School of Medicine, Site Investigator), Meghan Candee, MD (University of Utah, Primary Children's Hospital, Site Investigator), Lauren Krupp, MD (Lourie Center for Pediatric MS, Stony Brook Children's Hospital, Center Director), Mark Gorman, MD (Boston Children's Hospital, Center Director), Leslie Benson, MD (Boston Children's Hospital, Center Co-Director), Moses Rodriguez, MD (Mayo Clinic's Pediatric MS Center, Center Director), Soe Mar, MD (Pediatric-onset Demyelinating Diseases and Autoimmune Encephalitis Center St. Louis Children's Hospital, Washington University School of Medicine, Center Director), Ilana Kahn, MD (Children's National Medical Center, Site Investigator), John Rose, MD (Department of Neurology, University of Utah School of Medicine, Data Collection and Analysis Center, Co-PI), Shelly Roalstad, MSc, BS (Department of Pediatrics, University of Utah School of Medicine, Data Coordinating and Analysis Center, Program Director), T. Charles Casper, PhD (Department of Pediatrics, University of Utah School of Medicine, Data Coordinating and Analysis Center, Co-PI), Emmanuelle Waubant, MD, PhD (Department of Neurology, University of California, Center Director)

## Appendix 2

### U.S. Participants

~~Pediatric-onset MSPOMS~~ cases were enrolled through pediatric MS centers established across the U.S. at UC San Francisco (UCSF), Stony Brook, Children's Hospital of Philadelphia, Texas Children's Hospital, University of Colorado School of Medicine, University of Texas Southwestern, State University of New York Buffalo, Loma Linda University, Mayo Clinic, University of Alabama at Birmingham, Ann & Robert Lurie Children's Hospital of Chicago, University of Utah, Boston Children's Hospital, Massachusetts General Hospital, Washington University St. Louis, and Children's National Medical Center between January 2006 and December 2014. These centers are tertiary referral centers, but also serve local patients from all socioeconomic groups. A separate cohort of distinct cases were enrolled in a NIH supported case-control study (R01 NS071463, PI Waubant) with MS onset before the age of 18, seen within 4 years of disease onset, with at least 2 silent T2-bright foci on brain and cord MRI, and ascertained by a panel of at least two pediatric MS experts. Additional ~~pediatric-onset~~ PO-MS cases were also provided from an MS genetic study at UCSF who had a first symptom onset prior to age 18 based on medical records. All clinically isolated syndrome cases were excluded from this study.

### Whole Genome Genotyping

Whole blood was collected, processed and extracted for DNA using the Gentra Puregene protocol or received as Guthrie Card blood samples and extracted for DNA using the QIAamp DNA Micro Kit for Dried Blood Spots. Saliva was collected for DNA extraction using Oragene kits. Genome wide profiling was performed for all cases and a subset of controls (n=1,481) using the Illumina Infinium platform. The Infinium 660K, HumanOmniExpress, or HumanOmniExpressExome BeadChip was used to genotype each study participant. DNA was quantitated using the Nanodrop ND-1000, normalized and then plated for BeadChip processing. The RPGEH control group was genotyped using a custom designed Affymetrix Axiom array for individuals of non-Hispanic white (EUR) race/ethnicity with 670,176 single nucleotide polymorphisms (SNPs). High genome-wide SNP imputation coverage of these arrays including low frequency variants has been previously described.<sup>1,2</sup>

### Strand Alignment and Pre-Imputation Quality Control

Prior to phasing, the genetic map of Affymetrix chips and 660K chip were updated to build 37 using LiftOver.<sup>3</sup> Sample genotype alleles were aligned to the reference haplotype panel. Samples from the Illumina arrays were converted from Illumina's TOP format to '+' format<sup>4</sup> using script and strand files from the Wellcome Trust Centre for Human Genetics. Strand alignment for all chips was verified using SHAPEIT; misaligned SNPs were removed. All samples from Illumina OmniExpress and OmniExpressExome chips were merged for further analysis. Quality control was completed on each of the three platforms separately for phasing and imputation. We removed SNPs with minor allele frequency (MAF) <0.01 and genotyping rate < 90% (n=222,801). After removing low quality SNPs, PLINK<sup>5</sup> was used to check sample call-rate (n=2 with <90%) and sex discrepancies (n=5).

### Phasing and Imputation

Samples from all genotyping arrays were phased and imputed separately. Samples were pre-

phased using SHAPEIT (v2.r790) and imputed using IMPUTE2 (total n=81 million imputed SNPs for each array). Genotype imputation was performed using IMPUTE2 and the 1,000 Genomes Phase 3 reference haplotypes, based on sequence data from 2,504 individuals.<sup>6</sup> Files from the IMPUTE2 October 2014 haplotype release were downloaded ([https://mathgen.stats.ox.ac.uk/impute/1000GP\\_Phase3.html](https://mathgen.stats.ox.ac.uk/impute/1000GP_Phase3.html)). The reference panel includes ~81 million SNPs. After imputation, only SNPs with a high imputation quality score (IMPUTE2 info score  $\geq 0.3$ ) were retained for analysis (n=26,431,554 SNPs among the three platforms).

### Population Substructure

Classical multidimensional scaling (MDS) was performed to visualize population substructure and provide quantitative measures (components) of population genetic variation. MDS was completed for all genotyped data, which was merged with the Human Genome Diversity Project (HGDP) reference (<http://www.hagsc.org/hgdp/files.html>). SNPs present in <90% were removed. Whole genome data was pruned using a window of 100 SNPs. Linkage disequilibrium was calculated between each pair of SNPs in the window. If linkage disequilibrium between two SNPs ( $R^2$ ) was  $> 0.1$ , one of the SNPs was removed. Analysis of genome-wide average proportion of alleles shared identical by state was performed, and related/identical individuals were removed. The first three dimensions from MDS with the HGDP European population were used for identifying white, non-Hispanic study samples for the current study. Individual outliers were identified using MDS and excluded.

### MHC Quality Control

A total of 98,510 SNPs in the MHC had an info score  $\geq 0.3$  after imputation. Due to a high potential for the imputation results to be biased when imputing from multiple genotyping arrays, we used precautions to eliminate SNPs most likely to be biased from analysis. First, white controls were selected from the three platforms for comparison (660K vs. OMNI; OMNI vs. Affymetrix EUR; 660k vs. Affymetrix EUR). For each of these comparisons, we conducted pairwise analyses in three ways: 1) unmatched and unadjusted; 2) matched on MDS; and 3) unmatched but adjusting for the first three components of MDS. SNPs identified ( $p < 0.05$ ) from the union of the above three control comparisons were excluded (n=27,478). Second, because imputation of rare alleles is less reliable, we removed 16,262 SNPs with a MAF  $< 1\%$ . Finally, we removed 33,357 SNPs that were successfully imputed in fewer than 99% of individuals, and 210 SNPs found to be out of Hardy-Weinberg equilibrium (HWE) in controls ( $p < 0.000001$ ). A total of 21,203 SNPs remained for MHC region analysis. We additionally calculated HWE for each imputed SNP with info  $\geq 0.3$  by platform using post-MDS controls only. SNPs with HWE  $p$ -value  $< 0.000001$  in any of the three platforms were also excluded (N=6,989). Final analysis of the MHC included 14,214 SNPs.

### Swedish Genotyping and Quality Control

All participants were asked to give blood samples, which were genotyped on an Illumina custom array and on OmniExpress-24. [HLA genotypes, including HLA-DRB1 and HLA-A, -genotypes](#) were imputed with HLA\*IMP02<sup>7</sup> using MHC region data for each individual from the custom array. SNPs with  $< 2\%$  MAF, genotyped in  $< 98\%$  of individuals, or not in HWE among controls ( $p < 0.0001$ ) were removed from analysis. Individuals with  $> 2\%$  failed genotype calls, related individuals, or population outliers identified using the SmartPCA program were removed.<sup>8</sup> Ninety of the MS risk SNPs were present on the custom array. Proxy SNPs for an additional

eighteen MS risk SNPs were selected from the custom array ( $R^2 > 0.8$ , except rs28723576, which had  $R^2 > 0.71$ ).

#### Appendix References

1. Ha NT, Freytag S, Bickeboeller H. Coverage and efficiency in current SNP chips. *Eur J Hum Genet.* 2014;22:1124-30.
2. Hoffmann TJ, Kvale MN, Hesselton SE, et al. Next generation genome-wide association tool: design and coverage of a high-throughput European-optimized SNP array. *Genomics.* 2011;98(2):79-89.
3. Speir ML, Zweig AS, Rosenbloom KR, et al. The UCSC Genome Browser database: 2016 update. *Nucl Acids Res.* 2016;44:D717-25.
4. Nelson SC, Doheny KF, Laurie CC, Mirel DB. Is 'forward' the same as 'plus'?...and other adventures in SNP allele nomenclature. *Trends Genet.* 2012;28:361-363.
5. Purcell S, Neale B, Todd-Brown K, et al. PLINK: a tool set for whole-genome association and population-based linkage analyses. *Am J Hum Genet.* 2007;81:559-575.
6. The 1000 Genomes Project Consortium. A global reference for human genetic variation. *Nature.* 526:68-74.
7. Dilthey, AT, Leslie S, Moutsianas L, et al. Multi-population classical HLA type imputation. *PLoS Comput Biol.* 2013;9(2):e1002877.
8. Price AL, Patterson NJ, Plenge RM, Weinblatt ME, Shadick NA, Reich D. Principal components analysis corrects for stratification in genome-wide association studies. *Nat Genet.* 2006;38:904-909.

Supplementary Figure 1. Multidimensional scaling analysis of all U.S. **pediatric-onset** **PO**MS cases (n=714) and U.S. white controls (n=10,875).

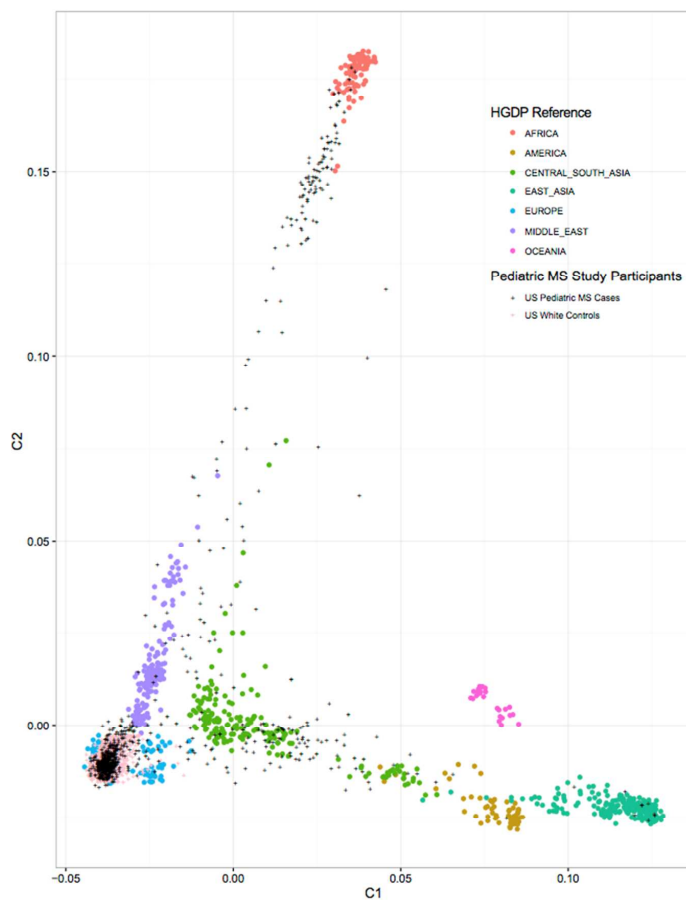

U.S. **pediatric-onset**PO-MS cases included 394 white, 12 African, 9 East Asian, 20 Central South Asian, 5 American, and 274 admixed individuals. Human Genome Diversity Project (HGDP) data (N=897) were merged with case and control data. Black + are color coded for cases and yellow + for controls in study participants. Circles are color coded for HGDP sample origin.

**Supplementary Figure 2. Average wGRS of POMS and adult-onset MS cases and controls in the U.S. and Sweden**

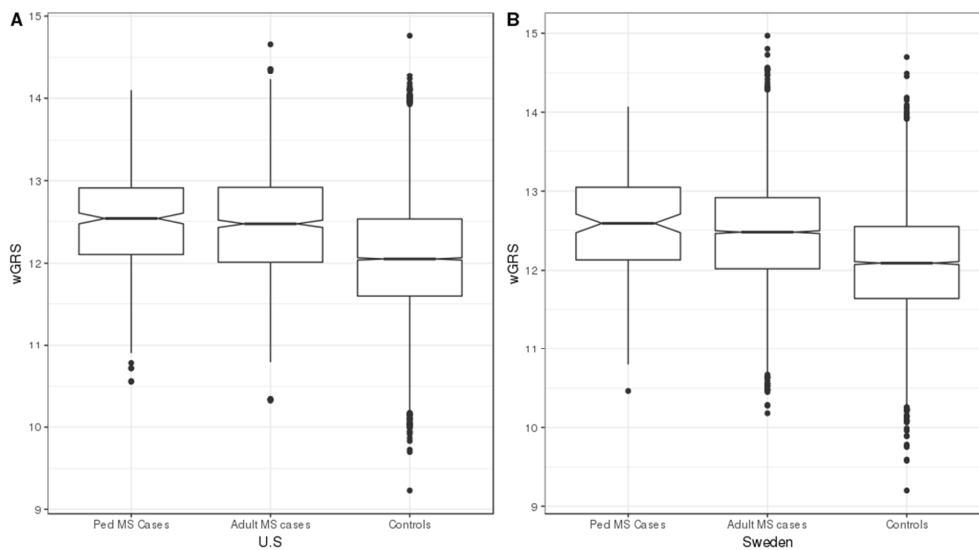

**Formatted:** Font: (Default) Times New Roman, Bold

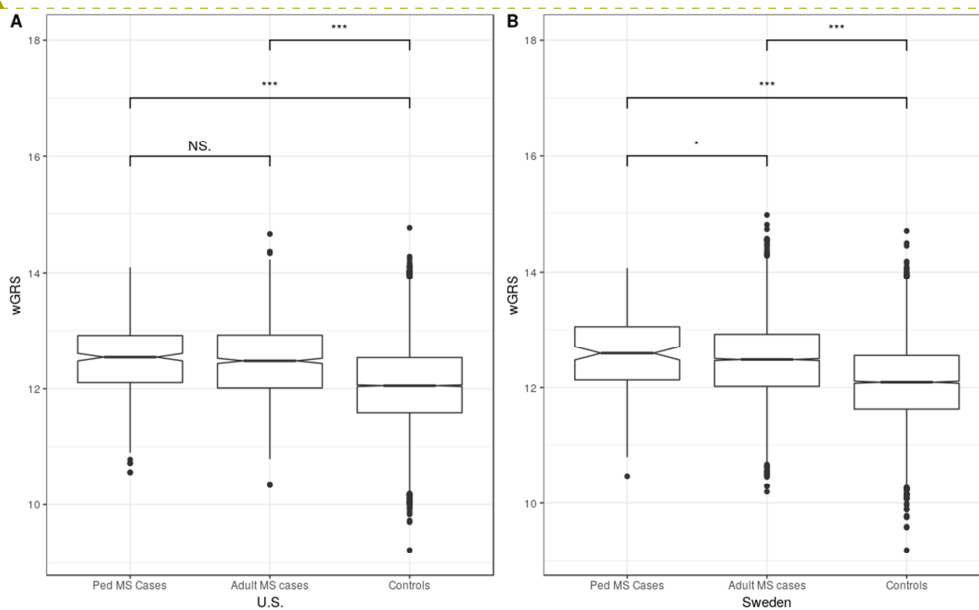

**Formatted:** Font: (Default) Times New Roman, Bold

**Asterisk denotes statistical significance: \* < 0.05, \*\* < 0.01, \*\*\* < 0.001.**

**Supplementary Table 1. Characteristics of adult-onset MS cases in the U.S. and Sweden**

|                       | U.S.     | Sweden     |
|-----------------------|----------|------------|
| N                     | 1,103    | 6,485      |
| Females:Males         | 4.0:1    | 1.7:1      |
| <i>HLA-DRB1*15:01</i> |          |            |
| 0                     | 517 (47) | 2,708 (42) |
| 1-2                   | 586 (53) | 3,777 (58) |

MS= multiple sclerosis; wGRS=weighted genetic risk score

Table values are mean (SD) for continuous variables or n (%) for categorical variables



**Supplementary Table 2. Individual MS risk variant results for U.S., Sweden and meta-analysis (Excel file)**

**Supplementary Table 3. MHC meta-analyses unadjusted and adjusted for *HLA-DRB1\*15:01* and *HLA-A\*02* (Excel file)**

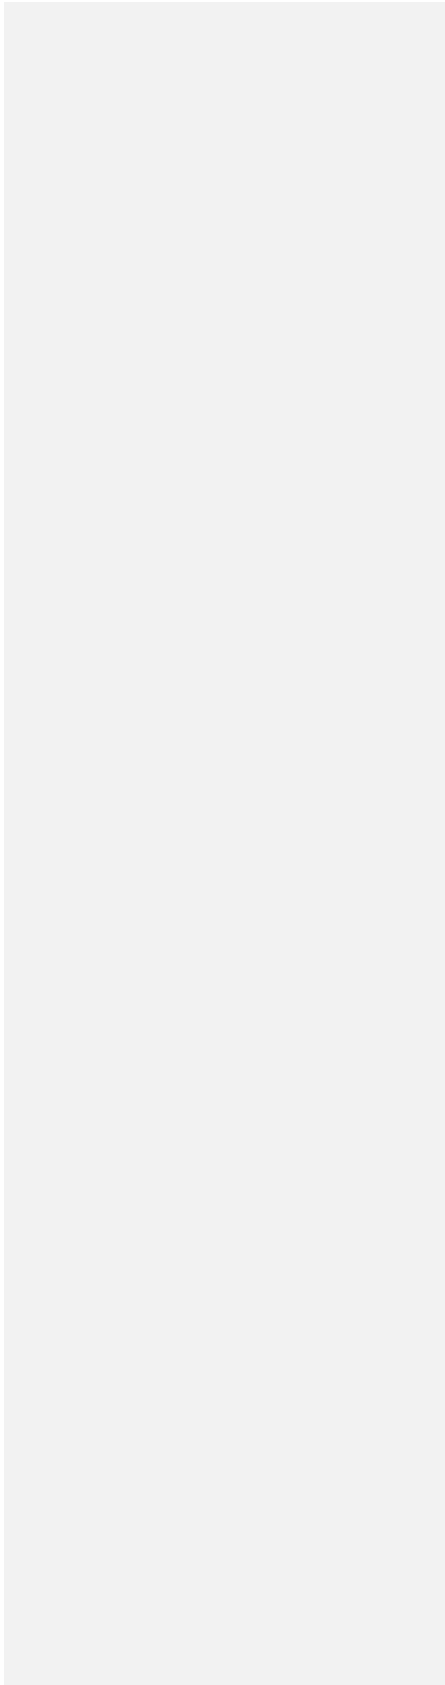

Supplementary Table 4. Comparisons of **pediatric-onset**PO-MS cases based on method of ascertainment

|                       | <b>U.S.<br/>Clinic Diagnosed<br/><u>PO</u>Pediatric-Onset<br/>MS Cases</b> | <b>U.S.<br/>Self-Reported<br/><u>PO</u>Pediatric-Onset<br/>MS Cases</b> | <b>Sweden<br/>Self-Reported<br/><u>Pediatric-Onset</u><u>PO</u><br/>MS Cases</b> |
|-----------------------|----------------------------------------------------------------------------|-------------------------------------------------------------------------|----------------------------------------------------------------------------------|
| N                     | 130                                                                        | 264                                                                     | 175                                                                              |
| Age of onset          | 12.81 (3.96)                                                               | 14.66 (2.80)                                                            | 14.91 (2.67)                                                                     |
| wGRS                  | 12.38 (0.68)                                                               | 12.56 (0.64)                                                            | 12.73 (0.66)                                                                     |
| <i>HLA-DRB1*15:01</i> |                                                                            |                                                                         |                                                                                  |
| 0                     | 67 (52)                                                                    | 126 (48)                                                                | 57 (33)                                                                          |
| 1-2                   | 63 (48)                                                                    | 138 (52)                                                                | 118 (67)                                                                         |

MS= multiple sclerosis; wGRS=weighted genetic risk score

Table values are mean (SD) for continuous variables or n (%) for categorical variables.

| CHR | RS#                     | ImmunoChip ID   | POSITION  | OR   |
|-----|-------------------------|-----------------|-----------|------|
| 1   | rs3748817               | imm_1_2515525   | 2525665   | 1.13 |
| 1   | rs3007421               | rs3007421       | 6530189   | 2.49 |
| 1   | rs12087340              | rs12087340      | 85746993  | 1.32 |
| 1   | rs11587876              | rs11587876      | 85915183  | 1.18 |
| 1   | rs41286801              | 1kg_1_92748052  | 92975464  | 1.26 |
| 1   | rs7552544               | 1kg_1_101013481 | 101240893 | 1.15 |
| 1   | rs11581062 <sup>a</sup> | rs11581062      | 101407519 | 1.20 |
| 1   | rs6677309               | imm_1_116881689 | 117080166 | 1.07 |
| 1   | rs666930                | rs666930        | 120258970 | 1.02 |
| 1   | rs2050568               | rs2050568       | 157770241 | 1.23 |
| 1   | rs35967351              | imm_1_158978428 | 160711804 | 1.05 |
| 1   | rs1359062               | imm_1_190808095 | 192541472 | 1.06 |
| 1   | rs55838263              | imm_1_199141351 | 200874728 | 1.01 |
| 2   | rs4665719               | rs4665719       | 25017860  | 0.85 |
| 2   | rs2163226               | 1kg_2_43214760  | 43361256  | 0.85 |
| 2   | rs842639                | imm_2_60948749  | 61095245  | 1.12 |
| 2   | rs7595717               | imm_2_68440981  | 68587477  | 1.24 |
| 2   | rs17174870              | rs17174870      | 112665201 | 1.03 |
| 2   | rs9967792               | imm_2_191682680 | 191974435 | 1.21 |
| 2   | rs9989735               | imm_2_230823698 | 231115454 | 1.30 |
| 3   | rs11719975              | 1kg_3_18760589  | 18785585  | 1.18 |
| 3   | rs2371108               | 1kg_3_27732022  | 27757018  | 1.23 |
| 3   | rs1813375               | 1kg_3_28053575  | 28078571  | 1.29 |
| 3   | rs4679081               | imm_3_32988487  | 33013483  | 1.16 |
| 3   | rs9828629               | rs9828629       | 71530346  | 1.27 |
| 3   | rs2028597               | rs2028597       | 105558837 | 1.67 |
| 3   | rs1131265               | imm_3_120705146 | 119222456 | 1.12 |
| 3   | rs1920296               | rs1920296       | 121543577 | 1.26 |
| 3   | rs2255214 <sup>b</sup>  | rs2255214       | 121770539 | 1.20 |
| 3   | rs9282641 <sup>c</sup>  | rs9282641       | 121796768 | 1.44 |
| 3   | rs1014486               | imm_3_161173806 | 159691112 | 1.14 |
| 4   | rs7665090               | rs7665090       | 103551603 | 1.11 |
| 4   | rs2726518               | rs2726518       | 106173199 | 1.11 |
| 5   | rs6881706               | imm_5_35914913  | 35879156  | 0.97 |
| 5   | rs6880778               | imm_5_40434853  | 40399096  | 1.07 |
| 5   | rs71624119              | imm_5_55476487  | 55440730  | 1.17 |
| 5   | rs756699                | rs756699        | 133446575 | 0.93 |
| 5   | none                    | imm_5_141486748 | 141506564 |      |

|    |                        |                         |           |      |
|----|------------------------|-------------------------|-----------|------|
| 5  | rs2546890              | imm_5_158692478         | 158759900 | 1.05 |
| 5  | rs4976646              | rs4976646               | 176788570 | 1.42 |
| 6  | rs17119                | rs17119                 | 14719496  | 1.19 |
| 6  | rs941816               | rs941816                | 36375304  | 1.04 |
| 6  | rs72928038             | imm_6_91033489          | 90976768  | 0.77 |
| 6  | rs802734               | imm_6_128320491         | 128278798 | 0.99 |
| 6  | rs11154801             | rs11154801              | 135739355 | 1.07 |
| 6  | rs17066096             | rs17066096              | 137452908 | 1.00 |
| 6  | rs7769192 <sup>d</sup> | imm_6_138004348         | 137962655 | 1.06 |
| 6  | rs67297943             | imm_6_138286509         | 138244816 | 1.25 |
| 6  | rs212405               | imm_6_159390547         | 159470559 | 1.15 |
| 7  | rs1843938              | rs1843938               | 3113034   | 1.05 |
| 7  | rs706015               | imm_7_26981513          | 27014988  | 0.98 |
| 7  | rs917116               | imm_7_28139264          | 28172739  | 1.12 |
| 7  | rs60600003             | 1kg_7_37348990          | 37382465  | 1.03 |
| 7  | rs201847125            | imm_7_50296113          | 50325567  |      |
| 7  | rs354033               | rs354033                | 149289464 | 1.07 |
| 8  | rs1021156              | 1kg_8_79738359          | 79575804  | 1.08 |
| 8  | rs2456449              | rs2456449               | 128192981 | 1.13 |
| 8  | rs4410871              | rs4410871               | 128815029 | 1.08 |
| 8  | rs759648               | imm_8_129228127         | 129158945 | 1.04 |
| 9  | rs2150702              | NA                      | 5893861   | 1.02 |
| 10 | rs2104286              | imm_10_6139051          | 6099045   | 1.22 |
| 10 | rs793108               | rs793108                | 31415106  | 1.14 |
| 10 | rs2688608              | rs2688608               | 75658349  | 1.23 |
| 10 | rs1782645              | imm_10_80718617         | 81048611  | 1.19 |
| 10 | rs7923837              | rs7923837               | 94481917  | 0.99 |
| 11 | rs7120737              | rs7120737               | 47702395  | 1.10 |
| 11 | rs34383631             | imm_11_60549906         | 60793330  | 1.05 |
| 11 | rs694739               | rs694739                | 64097233  | 1.21 |
| 11 | rs533646 <sup>e</sup>  | imm_11_118071956        | 118566746 | 1.13 |
| 11 | rs9736016              | imm_11_118230104        | 118724894 | 0.95 |
| 11 | rs523604 <sup>f</sup>  | imm_11_118260948        | 118755738 | 1.04 |
| 12 | rs1800693              | imm_12_6310270          | 6440009   | 1.74 |
| 12 | rs12296430             | ccc-12-6373761-G-C      | 6503500   | 1.08 |
| 12 | rs11052877             | imm_12_9796957          | 9905690   | 0.99 |
| 12 | rs201202118            | seq-t1d-12-56468329-A-T | 58182062  |      |
| 12 | rs7132277              | imm_12_122159335        | 123593382 | 1.26 |
| 13 | rs4772201              | 1kg_13_98884260         | 100086259 | 0.92 |
| 14 | rs2236262              | imm_14_68331225         | 69261472  | 1.03 |

|    |            |                 |           |      |
|----|------------|-----------------|-----------|------|
| 14 | rs4903324  | rs4903324       | 75961511  | 1.05 |
| 14 | rs74796499 | 1kg_14_87502081 | 88432328  | 1.59 |
| 14 | rs12148050 | rs12148050      | 103263788 | 1.10 |
| 15 | rs59772922 | imm_15_76994521 | 79207466  | 1.11 |
| 15 | rs8042861  | rs8042861       | 90977333  | 1.04 |
| 16 | rs2744148  | rs2744148       | 1073552   |      |
| 16 | rs12927355 | imm_16_11102272 | 11194771  | 1.33 |
| 16 | rs4780346  | imm_16_11196307 | 11288806  | 1.15 |
| 16 | rs6498184  | imm_16_11343491 | 11435990  | 1.12 |
| 16 | rs7204270  | rs7204270       | 30156963  | 1.26 |
| 16 | rs1886700  | imm_16_67243406 | 68685905  | 1.08 |
| 16 | rs12149527 | rs12149527      | 79110596  | 0.98 |
| 16 | rs7196953  | rs7196953       | 79649394  | 1.01 |
| 16 | rs35929052 | imm_16_84551985 | 85994484  | 0.84 |
| 17 | rs12946510 | imm_17_35165903 | 37912377  | 1.05 |
| 17 | rs4796791  | imm_17_37784289 | 40530763  | 1.10 |
| 17 | rs4794058  | rs4794058       | 45597098  | 1.00 |
| 17 | rs8070345  | rs8070345       | 57816757  | 1.29 |
| 18 | rs7238078  | rs7238078       | 56384192  | 1.09 |
| 19 | rs1077667  | rs1077667       | 6668972   | 1.00 |
| 19 | rs34536443 | imm_19_10324118 | 10463118  | 0.48 |
| 19 | rs2288904  | rs2288904       | 10742170  | 1.22 |
| 19 | rs1870071  | rs1870071       | 16505106  | 1.11 |
| 19 | rs11554159 | chr19_18146944  | 18285944  | 0.74 |
| 19 | rs8107548  | rs8107548       | 49870643  | 1.16 |
| 20 | rs4810485  | imm_20_44181354 | 44747947  | 1.06 |
| 20 | rs17785991 | imm_20_47872168 | 48438761  | 1.15 |
| 20 | rs2248359  | rs2248359       | 52791518  | 1.11 |
| 20 | rs2256814  | imm_20_61844427 | 62373983  | 0.92 |
| 20 | rs6062314  | rs6062314       | 62409713  | 0.70 |
| 22 | rs2283792  | rs2283792       | 22131125  | 1.12 |
| 22 | rs470119   | rs470119        | 50966914  | 1.25 |

| Coef  | U.S. Cohort |      |      |        | OR   | Swedis |      |
|-------|-------------|------|------|--------|------|--------|------|
|       | SE          | L95  | U95  | P      |      | Coef   | SE   |
| 0.12  | 0.08        | 0.97 | 1.32 | 0.110  | 1.10 | 0.10   | 0.12 |
| 0.91  | 0.10        | 2.04 | 3.03 | <0.001 | 1.29 | 0.25   | 0.15 |
| 0.28  | 0.12        | 1.05 | 1.67 | 0.017  | 1.06 | 0.06   | 0.20 |
| 0.16  | 0.10        | 0.97 | 1.42 | 0.091  | 1.17 | 0.15   | 0.14 |
| 0.23  | 0.09        | 1.04 | 1.51 | 0.016  | 1.10 | 0.09   | 0.15 |
| 0.14  | 0.08        | 1.00 | 1.34 | 0.058  | 1.09 | 0.09   | 0.11 |
| 0.18  | 0.08        | 1.03 | 1.39 | 0.021  | 1.25 | 0.23   | 0.12 |
| 0.07  | 0.12        | 0.85 | 1.34 | 0.559  | 1.59 | 0.47   | 0.19 |
| 0.02  | 0.07        | 0.88 | 1.18 | 0.787  | 0.95 | -0.05  | 0.11 |
| 0.20  | 0.07        | 1.06 | 1.42 | 0.006  | 0.77 | -0.27  | 0.11 |
| 0.05  | 0.08        | 0.89 | 1.23 | 0.564  | 0.66 | -0.41  | 0.13 |
| 0.05  | 0.10        | 0.87 | 1.28 | 0.572  | 1.35 | 0.30   | 0.15 |
| 0.01  | 0.08        | 0.86 | 1.19 | 0.910  | 1.47 | 0.38   | 0.13 |
| -0.16 | 0.09        | 0.72 | 1.02 | 0.075  | 1.12 | 0.12   | 0.12 |
| -0.17 | 0.09        | 0.71 | 1.00 | 0.056  | 1.38 | 0.32   | 0.13 |
| 0.11  | 0.08        | 0.96 | 1.31 | 0.165  | 1.07 | 0.06   | 0.12 |
| 0.21  | 0.08        | 1.06 | 1.44 | 0.007  | 1.12 | 0.11   | 0.12 |
| 0.03  | 0.09        | 0.87 | 1.22 | 0.756  | 0.96 | -0.04  | 0.12 |
| 0.19  | 0.08        | 1.03 | 1.42 | 0.022  | 1.00 | 0.00   | 0.11 |
| 0.26  | 0.09        | 1.10 | 1.54 | 0.002  | 1.27 | 0.24   | 0.13 |
| 0.17  | 0.08        | 1.01 | 1.38 | 0.039  | 1.26 | 0.23   | 0.12 |
| 0.20  | 0.07        | 1.06 | 1.42 | 0.006  | 1.12 | 0.11   | 0.11 |
| 0.25  | 0.07        | 1.11 | 1.48 | 0.001  | 1.23 | 0.21   | 0.11 |
| 0.15  | 0.08        | 1.00 | 1.35 | 0.047  |      |        |      |
| 0.24  | 0.08        | 1.09 | 1.47 | 0.002  | 1.22 | 0.20   | 0.12 |
| 0.51  | 0.16        | 1.22 | 2.29 | 0.001  |      |        |      |
| 0.11  | 0.10        | 0.93 | 1.35 | 0.236  | 1.17 | 0.15   | 0.15 |
| 0.23  | 0.08        | 1.08 | 1.46 | 0.003  | 1.30 | 0.26   | 0.12 |
| 0.18  | 0.07        | 1.04 | 1.39 | 0.014  | 1.18 | 0.17   | 0.11 |
| 0.37  | 0.15        | 1.08 | 1.93 | 0.014  | 2.21 | 0.79   | 0.26 |
| 0.13  | 0.07        | 0.99 | 1.32 | 0.064  | 1.42 | 0.35   | 0.11 |
| 0.11  | 0.07        | 0.96 | 1.28 | 0.145  | 1.18 | 0.17   | 0.11 |
| 0.11  | 0.07        | 0.96 | 1.29 | 0.143  | 0.90 | -0.11  | 0.11 |
| -0.03 | 0.08        | 0.83 | 1.15 | 0.752  | 1.26 | 0.23   | 0.13 |
| 0.07  | 0.07        | 0.93 | 1.24 | 0.348  | 1.00 | 0.00   | 0.11 |
| 0.16  | 0.09        | 0.98 | 1.40 | 0.082  | 1.47 | 0.38   | 0.15 |
| -0.07 | 0.11        | 0.75 | 1.15 | 0.497  | 1.29 | 0.25   | 0.17 |

|       |      |      |      |        |      |       |      |
|-------|------|------|------|--------|------|-------|------|
| 0.05  | 0.07 | 0.91 | 1.21 | 0.504  | 0.99 | -0.01 | 0.11 |
| 0.35  | 0.08 | 1.22 | 1.66 | <0.001 | 1.08 | 0.07  | 0.11 |
| 0.17  | 0.10 | 0.99 | 1.44 | 0.070  | 1.17 | 0.16  | 0.15 |
| 0.04  | 0.09 | 0.87 | 1.24 | 0.701  | 1.39 | 0.33  | 0.13 |
| -0.26 | 0.12 | 0.61 | 0.97 | 0.027  | 0.85 | -0.17 | 0.16 |
| -0.01 | 0.08 | 0.85 | 1.16 | 0.882  | 1.27 | 0.24  | 0.12 |
| 0.06  | 0.08 | 0.92 | 1.24 | 0.395  | 1.19 | 0.18  | 0.11 |
| 0.00  | 0.09 | 0.85 | 1.19 | 0.977  | 1.36 | 0.31  | 0.12 |
| 0.06  | 0.07 | 0.92 | 1.22 | 0.439  | 0.75 | -0.28 | 0.12 |
| 0.22  | 0.10 | 1.02 | 1.52 | 0.032  | 1.21 | 0.19  | 0.14 |
| 0.14  | 0.08 | 0.99 | 1.35 | 0.074  | 1.17 | 0.16  | 0.12 |
| 0.05  | 0.07 | 0.91 | 1.22 | 0.469  | 0.95 | -0.06 | 0.11 |
| -0.02 | 0.10 | 0.81 | 1.18 | 0.823  | 0.94 | -0.06 | 0.14 |
| 0.11  | 0.08 | 0.95 | 1.32 | 0.184  | 0.85 | -0.16 | 0.13 |
| 0.03  | 0.12 | 0.81 | 1.31 | 0.784  | 0.99 | -0.01 | 0.18 |
|       |      |      |      |        | 1.16 | 0.15  | 0.13 |
| 0.07  | 0.08 | 0.91 | 1.26 | 0.409  | 1.22 | 0.20  | 0.14 |
| 0.08  | 0.08 | 0.92 | 1.27 | 0.341  | 1.35 | 0.30  | 0.12 |
| 0.12  | 0.08 | 0.97 | 1.31 | 0.116  | 1.04 | 0.04  | 0.11 |
| 0.08  | 0.08 | 0.92 | 1.27 | 0.341  | 1.11 | 0.10  | 0.12 |
| 0.04  | 0.08 | 0.89 | 1.22 | 0.597  | 1.51 | 0.41  | 0.12 |
| 0.02  | 0.07 | 0.88 | 1.17 | 0.827  | 0.97 | -0.03 | 0.11 |
| 0.20  | 0.09 | 1.03 | 1.45 | 0.022  | 1.34 | 0.29  | 0.13 |
| 0.13  | 0.07 | 0.99 | 1.32 | 0.072  | 1.24 | 0.21  | 0.11 |
| 0.20  | 0.08 | 1.06 | 1.42 | 0.007  | 1.16 | 0.15  | 0.13 |
| 0.17  | 0.08 | 1.02 | 1.39 | 0.028  | 1.37 | 0.32  | 0.11 |
| -0.01 | 0.08 | 0.85 | 1.15 | 0.906  | 1.34 | 0.29  | 0.12 |
| 0.10  | 0.10 | 0.90 | 1.34 | 0.350  | 1.06 | 0.06  | 0.15 |
| 0.05  | 0.08 | 0.90 | 1.21 | 0.536  | 1.11 | 0.11  | 0.11 |
| 0.19  | 0.08 | 1.04 | 1.41 | 0.015  | 0.92 | -0.08 | 0.11 |
| 0.12  | 0.08 | 0.96 | 1.32 | 0.140  | 1.20 | 0.18  | 0.12 |
| -0.06 | 0.08 | 0.82 | 1.10 | 0.464  | 1.00 | 0.00  | 0.11 |
| 0.04  | 0.07 | 0.90 | 1.21 | 0.573  | 1.21 | 0.19  | 0.11 |
| 0.55  | 0.07 | 1.50 | 2.01 | <0.001 | 1.17 | 0.15  | 0.11 |
| 0.07  | 0.10 | 0.89 | 1.30 | 0.455  | 1.13 | 0.12  | 0.13 |
| -0.01 | 0.08 | 0.85 | 1.15 | 0.880  | 1.14 | 0.13  | 0.11 |
|       |      |      |      |        | 0.89 | -0.12 | 0.11 |
| 0.23  | 0.09 | 1.06 | 1.49 | 0.010  | 1.05 | 0.05  | 0.13 |
| -0.08 | 0.10 | 0.76 | 1.11 | 0.390  | 1.19 | 0.17  | 0.15 |
| 0.03  | 0.07 | 0.90 | 1.19 | 0.652  | 0.89 | -0.11 | 0.11 |



|       |      |      |      |        |      |       |      |
|-------|------|------|------|--------|------|-------|------|
| 0.05  | 0.09 | 0.88 | 1.26 | 0.570  | 1.04 | 0.04  | 0.13 |
| 0.47  | 0.22 | 1.04 | 2.44 | 0.033  | 2.10 | 0.74  | 0.38 |
| 0.10  | 0.08 | 0.95 | 1.28 | 0.205  | 1.35 | 0.30  | 0.11 |
| 0.10  | 0.10 | 0.92 | 1.34 | 0.295  | 1.04 | 0.04  | 0.14 |
| 0.04  | 0.07 | 0.90 | 1.20 | 0.574  | 0.96 | -0.05 | 0.11 |
| 0.29  | 0.08 | 1.14 | 1.56 | <0.001 | 1.43 | 0.36  | 0.13 |
| 0.14  | 0.08 | 0.98 | 1.35 | 0.085  | 1.11 | 0.11  | 0.12 |
| 0.11  | 0.10 | 0.92 | 1.37 | 0.269  | 1.07 | 0.06  | 0.15 |
| 0.23  | 0.07 | 1.09 | 1.45 | 0.002  | 1.03 | 0.03  | 0.11 |
| 0.07  | 0.10 | 0.88 | 1.31 | 0.462  | 0.88 | -0.12 | 0.15 |
| -0.02 | 0.07 | 0.85 | 1.14 | 0.801  | 1.15 | 0.14  | 0.11 |
| 0.01  | 0.08 | 0.87 | 1.18 | 0.876  | 0.87 | -0.14 | 0.12 |
| -0.18 | 0.13 | 0.65 | 1.08 | 0.167  | 1.40 | 0.34  | 0.18 |
| 0.05  | 0.07 | 0.91 | 1.21 | 0.515  | 1.15 | 0.14  | 0.11 |
| 0.09  | 0.08 | 0.95 | 1.27 | 0.215  | 1.18 | 0.17  | 0.11 |
| 0.00  | 0.07 | 0.87 | 1.16 | 0.956  | 1.02 | 0.02  | 0.11 |
| 0.25  | 0.07 | 1.11 | 1.48 | 0.001  | 1.06 | 0.05  | 0.11 |
| 0.08  | 0.09 | 0.92 | 1.29 | 0.346  | 1.05 | 0.05  | 0.13 |
| 0.00  | 0.09 | 0.83 | 1.20 | 0.989  | 1.32 | 0.27  | 0.14 |
| -0.73 | 0.22 | 0.32 | 0.74 | 0.001  | 0.91 | -0.09 | 0.27 |
| 0.20  | 0.09 | 1.02 | 1.47 | 0.032  | 0.95 | -0.06 | 0.14 |
| 0.10  | 0.08 | 0.95 | 1.29 | 0.186  | 1.07 | 0.07  | 0.11 |
| -0.30 | 0.09 | 0.62 | 0.87 | <0.001 | 1.42 | 0.35  | 0.14 |
| 0.15  | 0.08 | 0.99 | 1.36 | 0.060  | 0.98 | -0.02 | 0.12 |
| 0.06  | 0.08 | 0.90 | 1.25 | 0.498  | 1.09 | 0.08  | 0.12 |
| 0.14  | 0.08 | 0.99 | 1.34 | 0.065  | 0.92 | -0.08 | 0.11 |
| 0.10  | 0.07 | 0.96 | 1.29 | 0.167  | 1.14 | 0.13  | 0.12 |
| -0.09 | 0.10 | 0.76 | 1.11 | 0.385  | 1.18 | 0.17  | 0.13 |
| -0.35 | 0.14 | 0.53 | 0.93 | 0.012  | 1.01 | 0.00  | 0.19 |
| 0.12  | 0.07 | 0.97 | 1.30 | 0.110  | 1.10 | 0.10  | 0.11 |
| 0.22  | 0.08 | 1.07 | 1.46 | 0.005  | 1.05 | 0.05  | 0.11 |

| ih Cohort |      |       | META |      |      |        |
|-----------|------|-------|------|------|------|--------|
| L95       | U95  | P     | OR   | L95  | U95  | P      |
| 0.88      | 1.39 | 0.397 | 1.12 | 0.98 | 1.27 | 0.090  |
| 0.95      | 1.73 | 0.099 | 1.80 | 0.95 | 3.44 | 0.074  |
| 0.72      | 1.55 | 0.777 | 1.24 | 1.02 | 1.52 | 0.030  |
| 0.88      | 1.55 | 0.282 | 1.17 | 1.00 | 1.38 | 0.050  |
| 0.82      | 1.47 | 0.534 | 1.21 | 1.04 | 1.41 | 0.010  |
| 0.88      | 1.36 | 0.431 | 1.13 | 1.00 | 1.28 | 0.060  |
| 0.99      | 1.59 | 0.060 | 1.21 | 1.06 | 1.38 | 0.004  |
| 1.09      | 2.33 | 0.016 | 1.27 | 0.87 | 1.86 | 0.222  |
| 0.77      | 1.18 | 0.666 | 1.00 | 0.89 | 1.12 | 0.994  |
| 0.61      | 0.96 | 0.020 | 0.98 | 0.62 | 1.54 | 0.920  |
| 0.51      | 0.85 | 0.001 | 0.84 | 0.54 | 1.33 | 0.460  |
| 1.00      | 1.83 | 0.052 | 1.16 | 0.91 | 1.47 | 0.230  |
| 1.13      | 1.90 | 0.004 | 1.20 | 0.83 | 1.72 | 0.330  |
| 0.88      | 1.43 | 0.349 | 0.97 | 0.74 | 1.26 | 0.800  |
| 1.07      | 1.77 | 0.013 | 1.07 | 0.66 | 1.73 | 0.790  |
| 0.85      | 1.34 | 0.583 | 1.10 | 0.97 | 1.25 | 0.150  |
| 0.88      | 1.41 | 0.368 | 1.20 | 1.05 | 1.36 | 0.007  |
| 0.76      | 1.23 | 0.770 | 1.01 | 0.87 | 1.16 | 0.923  |
| 0.80      | 1.25 | 0.986 | 1.12 | 0.93 | 1.34 | 0.220  |
| 0.98      | 1.65 | 0.074 | 1.29 | 1.12 | 1.49 | 0.001  |
| 1.00      | 1.58 | 0.047 | 1.21 | 1.06 | 1.38 | 0.004  |
| 0.90      | 1.39 | 0.312 | 1.19 | 1.06 | 1.34 | 0.003  |
| 0.99      | 1.52 | 0.058 | 1.27 | 1.13 | 1.42 | <0.001 |
| 0.97      | 1.53 | 0.090 | 1.25 | 1.10 | 1.43 | 0.001  |
| 0.86      | 1.57 | 0.314 | 1.13 | 0.96 | 1.33 | 0.14   |
| 1.03      | 1.65 | 0.027 | 1.27 | 1.12 | 1.45 | <0.001 |
| 0.95      | 1.46 | 0.126 | 1.19 | 1.06 | 1.34 | 0.003  |
| 1.33      | 3.66 | 0.002 | 1.70 | 1.14 | 2.53 | 0.01   |
| 1.14      | 1.76 | 0.001 | 1.25 | 1.01 | 1.54 | 0.04   |
| 0.96      | 1.47 | 0.122 | 1.14 | 1.01 | 1.28 | 0.03   |
| 0.73      | 1.11 | 0.333 | 1.02 | 0.83 | 1.25 | 0.87   |
| 0.98      | 1.62 | 0.076 | 1.08 | 0.84 | 1.39 | 0.53   |
| 0.81      | 1.25 | 0.968 | 1.05 | 0.94 | 1.18 | 0.39   |
| 1.10      | 1.96 | 0.009 | 1.27 | 1.03 | 1.57 | 0.025  |
| 0.93      | 1.78 | 0.124 | 1.07 | 0.78 | 1.47 | 0.67   |

|      |      |       |      |      |      |       |
|------|------|-------|------|------|------|-------|
| 0.80 | 1.23 | 0.955 | 1.03 | 0.92 | 1.16 | 0.57  |
| 0.86 | 1.35 | 0.523 | 1.25 | 0.95 | 1.64 | 0.11  |
| 0.87 | 1.58 | 0.297 | 1.18 | 1.00 | 1.39 | 0.046 |
| 1.08 | 1.79 | 0.010 | 1.19 | 0.89 | 1.57 | 0.24  |
| 0.62 | 1.15 | 0.291 | 0.80 | 0.66 | 0.96 | 0.02  |
| 1.00 | 1.62 | 0.054 | 1.10 | 0.87 | 1.40 | 0.434 |
| 0.96 | 1.49 | 0.115 | 1.10 | 0.97 | 1.25 | 0.13  |
| 1.07 | 1.73 | 0.013 | 1.15 | 0.85 | 1.55 | 0.35  |
| 0.60 | 0.95 | 0.018 | 0.91 | 0.65 | 1.27 | 0.57  |
| 0.93 | 1.58 | 0.154 | 1.23 | 1.05 | 1.44 | 0.01  |
| 0.93 | 1.48 | 0.181 | 1.16 | 1.02 | 1.32 | 0.03  |
| 0.76 | 1.17 | 0.612 | 1.02 | 0.91 | 1.14 | 0.74  |
| 0.71 | 1.24 | 0.658 | 0.97 | 0.82 | 1.13 | 0.68  |
| 0.66 | 1.09 | 0.199 | 0.99 | 0.76 | 1.29 | 0.95  |
| 0.70 | 1.41 | 0.973 | 1.02 | 0.84 | 1.24 | 0.85  |
| 0.90 | 1.50 | 0.258 |      |      |      |       |
| 0.93 | 1.59 | 0.148 | 1.11 | 0.97 | 1.27 | 0.14  |
| 1.08 | 1.70 | 0.009 | 1.19 | 0.96 | 1.48 | 0.11  |
| 0.84 | 1.30 | 0.699 | 1.10 | 0.97 | 1.25 | 0.15  |
| 0.87 | 1.41 | 0.413 | 1.09 | 0.96 | 1.25 | 0.2   |
| 1.18 | 1.92 | 0.001 | 1.24 | 0.86 | 1.78 | 0.25  |
| 0.79 | 1.20 | 0.801 | 1.01 | 0.90 | 1.13 | 0.92  |
| 1.03 | 1.73 | 0.028 | 1.26 | 1.09 | 1.45 | 0.002 |
| 1.00 | 1.53 | 0.053 | 1.17 | 1.04 | 1.31 | 0.01  |
| 0.89 | 1.50 | 0.275 | 1.20 | 1.05 | 1.38 | 0.01  |
| 1.11 | 1.70 | 0.004 | 1.25 | 1.09 | 1.43 | 0.001 |
| 1.07 | 1.68 | 0.012 | 1.14 | 0.85 | 1.52 | 0.391 |
| 0.80 | 1.41 | 0.693 | 1.09 | 0.93 | 1.28 | 0.3   |
| 0.89 | 1.39 | 0.359 | 1.07 | 0.94 | 1.22 | 0.3   |
| 0.74 | 1.15 | 0.482 | 1.07 | 0.82 | 1.39 | 0.62  |
| 0.96 | 1.51 | 0.120 | 1.15 | 1.01 | 1.31 | 0.04  |
| 0.80 | 1.24 | 0.981 | 0.96 | 0.85 | 1.09 | 0.53  |
| 0.98 | 1.51 | 0.083 | 1.09 | 0.95 | 1.26 | 0.2   |
| 0.94 | 1.45 | 0.163 | 1.43 | 0.97 | 2.12 | 0.07  |
| 0.88 | 1.46 | 0.345 | 1.09 | 0.93 | 1.28 | 0.26  |
| 0.91 | 1.42 | 0.251 | 1.04 | 0.91 | 1.18 | 0.58  |
| 0.71 | 1.11 | 0.310 |      |      |      |       |
| 0.81 | 1.37 | 0.704 | 1.18 | 1.00 | 1.40 | 0.048 |
| 0.89 | 1.59 | 0.240 | 1.02 | 0.80 | 1.30 | 0.87  |
| 0.72 | 1.11 | 0.302 | 0.98 | 0.86 | 1.12 | 0.8   |

|      |      |       |      |      |      |        |
|------|------|-------|------|------|------|--------|
| 0.80 | 1.35 | 0.779 | 1.05 | 0.90 | 1.21 | 0.54   |
| 0.99 | 4.46 | 0.053 | 1.71 | 1.18 | 2.49 | 0.005  |
| 1.09 | 1.68 | 0.007 | 1.20 | 0.99 | 1.47 | 0.06   |
| 0.79 | 1.37 | 0.762 | 1.08 | 0.92 | 1.27 | 0.32   |
| 0.77 | 1.19 | 0.681 | 1.02 | 0.90 | 1.14 | 0.79   |
|      |      |       |      |      |      |        |
| 1.11 | 1.84 | 0.006 | 1.36 | 1.19 | 1.56 | <0.001 |
| 0.89 | 1.40 | 0.358 | 1.14 | 1.00 | 1.29 | 0.049  |
| 0.80 | 1.43 | 0.664 | 1.10 | 0.94 | 1.30 | 0.25   |
| 0.83 | 1.28 | 0.770 | 1.16 | 0.96 | 1.40 | 0.125  |
| 0.66 | 1.18 | 0.397 | 1.00 | 0.84 | 1.20 | 0.98   |
| 0.92 | 1.42 | 0.214 | 1.04 | 0.89 | 1.20 | 0.64   |
| 0.68 | 1.11 | 0.269 | 0.97 | 0.85 | 1.10 | 0.621  |
| 0.98 | 2.00 | 0.063 | 1.07 | 0.64 | 1.76 | 0.808  |
| 0.93 | 1.42 | 0.186 | 1.08 | 0.96 | 1.21 | 0.19   |
| 0.95 | 1.48 | 0.139 | 1.12 | 0.99 | 1.28 | 0.08   |
| 0.82 | 1.26 | 0.877 | 1.01 | 0.89 | 1.13 | 0.94   |
| 0.85 | 1.31 | 0.623 | 1.19 | 0.98 | 1.43 | 0.08   |
| 0.81 | 1.36 | 0.708 | 1.07 | 0.93 | 1.24 | 0.344  |
| 0.99 | 1.75 | 0.057 | 1.12 | 0.86 | 1.46 | 0.4    |
| 0.54 | 1.54 | 0.734 | 0.65 | 0.35 | 1.22 | 0.18   |
| 0.72 | 1.24 | 0.689 | 1.10 | 0.85 | 1.41 | 0.47   |
| 0.86 | 1.34 | 0.532 | 1.09 | 0.96 | 1.24 | 0.17   |
| 1.07 | 1.87 | 0.014 | 1.02 | 0.54 | 1.92 | 0.96   |
| 0.77 | 1.25 | 0.878 | 1.10 | 0.94 | 1.28 | 0.26   |
| 0.85 | 1.38 | 0.512 | 1.07 | 0.94 | 1.22 | 0.32   |
| 0.74 | 1.15 | 0.474 | 1.04 | 0.84 | 1.30 | 0.69   |
| 0.90 | 1.43 | 0.283 | 1.11 | 0.99 | 1.25 | 0.08   |
| 0.92 | 1.52 | 0.186 | 1.03 | 0.80 | 1.32 | 0.83   |
| 0.69 | 1.47 | 0.979 | 0.82 | 0.58 | 1.16 | 0.26   |
| 0.89 | 1.37 | 0.373 | 1.12 | 1.00 | 1.26 | 0.054  |
| 0.84 | 1.30 | 0.671 | 1.16 | 0.98 | 1.37 | 0.08   |

**MHC Meta-Analysis Results - Adjusted**

| <b>SNP</b> | <b>P-value</b> | <b>OR</b> |
|------------|----------------|-----------|
| 6:32026257 | 8.95E-42       | 2.516     |
| 6:31812038 | 6.11E-33       | 2.2834    |
| 6:32050544 | 1.09E-31       | 2.421     |
| 6:31618761 | 1.32E-31       | 2.2432    |
| 6:31586094 | 2.29E-30       | 2.2129    |
| 6:32071893 | 2.73E-30       | 2.4658    |
| 6:32415109 | 3.17E-28       | 2.5423    |
| 6:31914935 | 2.27E-26       | 2.0009    |
| 6:32411726 | 6.71E-26       | 2.5395    |
| 6:32627747 | 2.13E-25       | 1.9144    |
| 6:32663631 | 7.31E-25       | 1.9002    |
| 6:32667119 | 7.65E-25       | 1.8979    |
| 6:31636031 | 9.77E-25       | 2.2228    |
| 6:32667946 | 6.90E-24       | 1.8766    |
| 6:32629847 | 1.02E-23       | 1.8781    |
| 6:32295419 | 1.71E-23       | 2.851     |
| 6:32257566 | 1.75E-23       | 1.8453    |
| 6:32413317 | 1.75E-23       | 2.4393    |
| 6:31778272 | 1.85E-23       | 1.9595    |
| 6:32224388 | 2.54E-23       | 1.8402    |
| 6:31813774 | 3.72E-23       | 1.9435    |
| 6:32689078 | 4.65E-23       | 1.8674    |
| 6:32217413 | 9.51E-23       | 1.8236    |
| 6:32691411 | 2.30E-22       | 1.8368    |
| 6:31717692 | 2.59E-22       | 1.9146    |
| 6:32689414 | 3.48E-22       | 1.8345    |
| 6:32694738 | 3.54E-22       | 1.8324    |
| 6:32406342 | 4.54E-22       | 1.8       |
| 6:32694641 | 5.14E-22       | 1.829     |
| 6:32691919 | 5.28E-22       | 1.8263    |
| 6:32694710 | 5.35E-22       | 1.8307    |
| 6:32692919 | 7.48E-22       | 1.825     |
| 6:32694604 | 7.79E-22       | 1.8222    |
| 6:32688804 | 8.50E-22       | 1.8251    |
| 6:31698352 | 9.27E-22       | 1.9012    |
| 6:32690276 | 9.61E-22       | 1.82      |
| 6:32698457 | 9.87E-22       | 1.8226    |
| 6:32697739 | 1.02E-21       | 1.8172    |
| 6:32706334 | 1.09E-21       | 1.8252    |
| 6:32685953 | 1.10E-21       | 1.8167    |

|            |          |        |
|------------|----------|--------|
| 6:32694242 | 1.15E-21 | 1.8231 |
| 6:32697801 | 1.16E-21 | 1.8154 |
| 6:32042322 | 1.24E-21 | 1.8455 |
| 6:32688617 | 1.50E-21 | 1.8126 |
| 6:32698047 | 1.53E-21 | 1.8119 |
| 6:32687689 | 1.56E-21 | 1.8126 |
| 6:32688728 | 1.59E-21 | 1.8161 |
| 6:32688730 | 1.59E-21 | 1.8161 |
| 6:32693566 | 1.81E-21 | 1.8091 |
| 6:32698417 | 1.82E-21 | 1.8091 |
| 6:32698421 | 1.82E-21 | 1.8091 |
| 6:32695022 | 1.87E-21 | 1.8088 |
| 6:32697907 | 1.87E-21 | 1.8105 |
| 6:32690027 | 1.92E-21 | 1.8084 |
| 6:32692711 | 1.92E-21 | 1.8084 |
| 6:32698322 | 1.92E-21 | 1.8076 |
| 6:32688273 | 1.98E-21 | 1.8134 |
| 6:32695082 | 1.98E-21 | 1.8081 |
| 6:32688055 | 2.03E-21 | 1.8098 |
| 6:32702930 | 2.07E-21 | 1.8077 |
| 6:32692509 | 2.09E-21 | 1.807  |
| 6:32688343 | 2.11E-21 | 1.8091 |
| 6:32697943 | 2.18E-21 | 1.8084 |
| 6:32699080 | 2.18E-21 | 1.8059 |
| 6:32706480 | 2.22E-21 | 1.8099 |
| 6:32704982 | 2.43E-21 | 1.8085 |
| 6:32693182 | 2.52E-21 | 1.8064 |
| 6:32692617 | 2.56E-21 | 1.8042 |
| 6:32692023 | 2.65E-21 | 1.8061 |
| 6:32692122 | 2.70E-21 | 1.8064 |
| 6:32687588 | 2.88E-21 | 1.8023 |
| 6:32716022 | 3.07E-21 | 1.8044 |
| 6:32700700 | 3.15E-21 | 1.8045 |
| 6:32706234 | 3.24E-21 | 1.8037 |
| 6:32713188 | 3.51E-21 | 1.8034 |
| 6:32688302 | 4.26E-21 | 1.7943 |
| 6:32690713 | 4.90E-21 | 1.7974 |
| 6:32688798 | 5.87E-21 | 1.7984 |
| 6:32698285 | 6.42E-21 | 1.7965 |
| 6:32693200 | 7.50E-21 | 1.7917 |
| 6:31604044 | 1.72E-20 | 2.2024 |
| 6:32427789 | 2.48E-20 | 1.7694 |
| 6:31449327 | 5.23E-20 | 1.918  |

|            |          |        |
|------------|----------|--------|
| 6:31707730 | 7.06E-20 | 2.1907 |
| 6:32602482 | 8.80E-20 | 2.056  |
| 6:32414420 | 4.73E-19 | 2.4528 |
| 6:32693711 | 5.15E-19 | 1.7556 |
| 6:32413150 | 6.34E-19 | 1.7734 |
| 6:32411646 | 1.30E-18 | 1.7743 |
| 6:32223258 | 1.64E-18 | 1.7484 |
| 6:31481113 | 1.66E-18 | 1.7935 |
| 6:32289390 | 4.50E-18 | 2.6653 |
| 6:31614102 | 1.07E-17 | 1.9871 |
| 6:31480923 | 1.34E-17 | 1.7858 |
| 6:32413051 | 1.35E-17 | 2.9346 |
| 6:32786917 | 1.41E-17 | 1.7506 |
| 6:31577825 | 1.42E-17 | 2.1935 |
| 6:31922254 | 1.57E-17 | 1.7049 |
| 6:31947460 | 1.71E-17 | 1.7021 |
| 6:32237926 | 1.82E-17 | 2.6585 |
| 6:32080146 | 1.85E-17 | 2.4691 |
| 6:32259527 | 2.89E-17 | 2.655  |
| 6:32320153 | 4.20E-17 | 2.7149 |
| 6:32316016 | 4.26E-17 | 2.7189 |
| 6:32413459 | 8.02E-17 | 1.7703 |
| 6:32323529 | 8.38E-17 | 1.6606 |
| 6:31506744 | 9.54E-17 | 1.7469 |
| 6:31929014 | 9.71E-17 | 1.6832 |
| 6:31496925 | 1.05E-16 | 1.7457 |
| 6:31498497 | 1.07E-16 | 1.7454 |
| 6:31504587 | 1.07E-16 | 1.7412 |
| 6:31506854 | 1.07E-16 | 1.741  |
| 6:31502767 | 1.20E-16 | 1.7393 |
| 6:31506624 | 1.27E-16 | 1.7389 |
| 6:31499354 | 1.28E-16 | 1.7387 |
| 6:31497457 | 1.29E-16 | 1.7383 |
| 6:31497744 | 1.40E-16 | 1.7373 |
| 6:32649676 | 1.43E-16 | 1.6477 |
| 6:32326045 | 1.45E-16 | 1.6536 |
| 6:32305979 | 1.78E-16 | 2.7247 |
| 6:31488904 | 1.83E-16 | 1.734  |
| 6:32793981 | 2.22E-16 | 1.7319 |
| 6:32325707 | 3.96E-16 | 1.641  |
| 6:32337630 | 4.10E-16 | 1.6356 |
| 6:31508761 | 4.37E-16 | 1.7208 |
| 6:32322393 | 4.75E-16 | 1.6391 |

|            |          |        |
|------------|----------|--------|
| 6:32327781 | 6.34E-16 | 1.6319 |
| 6:32328403 | 6.34E-16 | 1.6319 |
| 6:32333195 | 6.38E-16 | 1.6319 |
| 6:32321115 | 6.68E-16 | 1.6312 |
| 6:32321872 | 6.72E-16 | 1.6312 |
| 6:32412539 | 7.30E-16 | 1.7682 |
| 6:32669018 | 7.52E-16 | 1.6293 |
| 6:32412480 | 1.46E-15 | 1.7675 |
| 6:32413094 | 1.46E-15 | 1.7675 |
| 6:32413259 | 1.46E-15 | 1.7675 |
| 6:32678999 | 2.75E-15 | 1.6233 |
| 6:32278635 | 4.67E-15 | 2.3094 |
| 6:31475127 | 5.06E-15 | 1.6592 |
| 6:32451570 | 5.35E-15 | 0.5916 |
| 6:32665285 | 6.58E-15 | 1.6016 |
| 6:31524851 | 7.32E-15 | 1.6686 |
| 6:32664880 | 8.56E-15 | 1.5985 |
| 6:32661294 | 1.07E-14 | 1.5972 |
| 6:32420179 | 1.33E-14 | 1.7341 |
| 6:32665086 | 1.33E-14 | 1.5949 |
| 6:32666738 | 1.37E-14 | 1.5956 |
| 6:32663925 | 1.40E-14 | 1.5969 |
| 6:32410576 | 1.57E-14 | 2.2242 |
| 6:31657413 | 1.67E-14 | 1.6511 |
| 6:32658327 | 1.77E-14 | 1.5883 |
| 6:32664458 | 1.87E-14 | 1.5916 |
| 6:32927969 | 3.44E-14 | 1.8875 |
| 6:32921774 | 3.70E-14 | 1.8873 |
| 6:32670464 | 3.91E-14 | 1.5821 |
| 6:31484561 | 4.01E-14 | 1.6311 |
| 6:32944987 | 4.21E-14 | 1.8836 |
| 6:32671765 | 4.22E-14 | 1.5807 |
| 6:32670897 | 4.26E-14 | 1.5807 |
| 6:32674952 | 4.29E-14 | 1.5808 |
| 6:32917857 | 5.20E-14 | 1.8739 |
| 6:32660375 | 6.09E-14 | 1.5761 |
| 6:32668323 | 6.12E-14 | 1.5739 |
| 6:32948804 | 6.57E-14 | 1.8731 |
| 6:32670308 | 7.91E-14 | 1.5714 |
| 6:32626739 | 1.01E-13 | 0.6275 |
| 6:32668336 | 1.04E-13 | 1.5714 |
| 6:32199352 | 1.24E-13 | 1.5804 |
| 6:31220567 | 1.44E-13 | 1.6836 |



|            |          |        |
|------------|----------|--------|
| 6:31610384 | 3.17E-13 | 1.5573 |
| 6:31485354 | 3.29E-13 | 1.6096 |
| 6:32658310 | 7.01E-13 | 0.6394 |
| 6:32743217 | 8.69E-13 | 1.5578 |
| 6:32176211 | 1.07E-12 | 1.6329 |
| 6:32742059 | 1.35E-12 | 1.5494 |
| 6:32746920 | 1.45E-12 | 1.5474 |
| 6:32746984 | 1.47E-12 | 1.5474 |
| 6:32744145 | 1.49E-12 | 1.5474 |
| 6:32752577 | 1.49E-12 | 1.547  |
| 6:32752788 | 1.56E-12 | 1.548  |
| 6:32745324 | 1.61E-12 | 1.546  |
| 6:32753682 | 1.63E-12 | 1.5466 |
| 6:32757396 | 1.67E-12 | 1.5461 |
| 6:32747060 | 1.69E-12 | 1.5456 |
| 6:31438390 | 1.77E-12 | 1.557  |
| 6:32757453 | 1.78E-12 | 1.5445 |
| 6:32757158 | 1.89E-12 | 1.544  |
| 6:31464571 | 2.14E-12 | 1.6482 |
| 6:32804414 | 2.53E-12 | 1.5463 |
| 6:32592200 | 2.85E-12 | 2.6388 |
| 6:32797488 | 2.98E-12 | 1.7354 |
| 6:32337686 | 3.20E-12 | 2.3378 |
| 6:32757938 | 3.49E-12 | 1.5372 |
| 6:32221782 | 5.02E-12 | 1.7791 |
| 6:32592209 | 5.48E-12 | 2.6357 |
| 6:31437318 | 5.49E-12 | 1.5461 |
| 6:32315727 | 6.53E-12 | 2.2889 |
| 6:31437158 | 6.97E-12 | 1.5443 |
| 6:32741742 | 8.13E-12 | 1.5275 |
| 6:32323745 | 9.87E-12 | 2.3459 |
| 6:31221396 | 1.11E-11 | 1.7174 |
| 6:31437195 | 1.34E-11 | 1.5361 |
| 6:31473286 | 1.40E-11 | 1.6549 |
| 6:31497399 | 1.70E-11 | 1.5317 |
| 6:31209045 | 2.42E-11 | 1.4971 |
| 6:31510858 | 2.68E-11 | 1.5232 |
| 6:31475486 | 2.70E-11 | 1.5288 |
| 6:31476514 | 2.72E-11 | 1.5268 |
| 6:31490725 | 2.72E-11 | 1.5342 |
| 6:31476134 | 3.22E-11 | 1.5294 |
| 6:31492025 | 3.31E-11 | 1.5296 |
| 6:31492004 | 3.76E-11 | 1.5282 |

|            |          |        |
|------------|----------|--------|
| 6:31488145 | 3.97E-11 | 1.5296 |
| 6:31488191 | 4.05E-11 | 1.5273 |
| 6:31208610 | 4.20E-11 | 1.4885 |
| 6:31491131 | 4.20E-11 | 1.5263 |
| 6:31510105 | 4.24E-11 | 1.5161 |
| 6:31643399 | 4.54E-11 | 1.6412 |
| 6:32310396 | 4.90E-11 | 2.3235 |
| 6:31475413 | 5.30E-11 | 1.5271 |
| 6:31509432 | 7.37E-11 | 1.5093 |
| 6:32725193 | 7.42E-11 | 1.4847 |
| 6:32184345 | 8.67E-11 | 0.503  |
| 6:31234381 | 9.01E-11 | 1.4908 |
| 6:31475811 | 1.21E-10 | 1.5333 |
| 6:32740442 | 1.24E-10 | 1.4868 |
| 6:32312082 | 1.29E-10 | 2.2684 |
| 6:32184574 | 1.41E-10 | 0.5048 |
| 6:32186193 | 1.41E-10 | 0.5048 |
| 6:32418031 | 1.41E-10 | 1.7595 |
| 6:32730012 | 1.44E-10 | 1.4758 |
| 6:29930619 | 1.54E-10 | 1.5607 |
| 6:30853796 | 1.59E-10 | 1.5288 |
| 6:31847012 | 1.59E-10 | 1.4842 |
| 6:32218843 | 1.62E-10 | 0.662  |
| 6:32325292 | 1.72E-10 | 2.3172 |
| 6:32220685 | 1.74E-10 | 0.6624 |
| 6:32221228 | 1.76E-10 | 1.7708 |
| 6:32186245 | 1.77E-10 | 0.4655 |
| 6:31216262 | 2.06E-10 | 1.4675 |
| 6:32316240 | 2.33E-10 | 2.3147 |
| 6:31218984 | 2.68E-10 | 1.4631 |
| 6:31860337 | 2.71E-10 | 1.4775 |
| 6:31211436 | 2.98E-10 | 1.462  |
| 6:32424882 | 3.28E-10 | 1.7575 |
| 6:32297901 | 3.36E-10 | 2.3223 |
| 6:31856070 | 3.41E-10 | 1.4729 |
| 6:32186264 | 3.65E-10 | 1.684  |
| 6:32297906 | 3.65E-10 | 2.3218 |
| 6:31218327 | 3.89E-10 | 1.459  |
| 6:32298942 | 4.32E-10 | 2.3208 |
| 6:31220109 | 5.87E-10 | 1.4475 |
| 6:32338400 | 6.49E-10 | 2.325  |
| 6:32186872 | 6.54E-10 | 0.5166 |
| 6:31233845 | 7.66E-10 | 1.735  |

|            |          |        |
|------------|----------|--------|
| 6:32335516 | 1.10E-09 | 2.3058 |
| 6:31208340 | 1.24E-09 | 1.4435 |
| 6:29937826 | 1.57E-09 | 1.603  |
| 6:31210216 | 1.63E-09 | 1.4392 |
| 6:31439740 | 1.80E-09 | 1.441  |
| 6:32582548 | 2.04E-09 | 0.6835 |
| 6:30142674 | 2.26E-09 | 1.5699 |
| 6:29934454 | 2.56E-09 | 1.5876 |
| 6:29926139 | 2.70E-09 | 1.5892 |
| 6:29981427 | 3.91E-09 | 1.584  |
| 6:31480906 | 4.18E-09 | 1.4453 |
| 6:30140342 | 4.61E-09 | 1.5588 |
| 6:29973925 | 5.41E-09 | 1.498  |
| 6:29955199 | 5.66E-09 | 1.5933 |
| 6:30067681 | 6.19E-09 | 1.5771 |
| 6:29928574 | 6.32E-09 | 1.5765 |
| 6:32404859 | 7.03E-09 | 1.9631 |
| 6:31302525 | 7.38E-09 | 1.7794 |
| 6:32685865 | 7.91E-09 | 1.432  |
| 6:29996255 | 7.93E-09 | 1.5658 |
| 6:30030114 | 8.20E-09 | 1.5646 |
| 6:32752840 | 8.31E-09 | 1.4179 |
| 6:30037990 | 8.49E-09 | 1.5655 |
| 6:31210462 | 8.68E-09 | 1.463  |
| 6:31610529 | 9.14E-09 | 0.6991 |
| 6:31234541 | 9.22E-09 | 1.7425 |
| 6:32758571 | 9.26E-09 | 1.4161 |
| 6:32759297 | 9.52E-09 | 1.4158 |
| 6:31610686 | 9.61E-09 | 0.6995 |
| 6:32296780 | 9.80E-09 | 0.6907 |
| 6:32301289 | 9.92E-09 | 0.6907 |
| 6:32754409 | 1.01E-08 | 1.415  |
| 6:32303511 | 1.02E-08 | 0.6909 |
| 6:32581253 | 1.04E-08 | 0.6858 |
| 6:31302168 | 1.05E-08 | 1.7766 |
| 6:30199016 | 1.06E-08 | 1.5351 |
| 6:32292084 | 1.08E-08 | 0.6913 |
| 6:32307260 | 1.08E-08 | 0.6915 |
| 6:30200873 | 1.09E-08 | 1.5302 |
| 6:32581190 | 1.09E-08 | 0.6861 |
| 6:32754081 | 1.10E-08 | 1.4142 |
| 6:29983715 | 1.17E-08 | 1.564  |
| 6:31209510 | 1.27E-08 | 1.4095 |

|            |          |        |
|------------|----------|--------|
| 6:32758219 | 1.30E-08 | 1.4112 |
| 6:29929336 | 1.37E-08 | 1.5549 |
| 6:32757971 | 1.38E-08 | 1.4105 |
| 6:30069137 | 1.41E-08 | 1.5501 |
| 6:32290954 | 1.49E-08 | 0.6924 |
| 6:32759335 | 1.69E-08 | 1.4081 |
| 6:32740761 | 2.19E-08 | 1.4181 |
| 6:32298372 | 2.25E-08 | 0.6953 |
| 6:31233353 | 2.32E-08 | 1.6968 |
| 6:32333955 | 2.35E-08 | 0.696  |
| 6:32254654 | 2.36E-08 | 0.6956 |
| 6:31314313 | 2.40E-08 | 1.7732 |
| 6:31315540 | 2.40E-08 | 1.7732 |
| 6:32257337 | 2.40E-08 | 0.6969 |
| 6:32307382 | 2.43E-08 | 0.696  |
| 6:32297337 | 2.47E-08 | 0.6962 |
| 6:31461089 | 2.59E-08 | 1.4096 |
| 6:32405671 | 2.60E-08 | 1.9559 |
| 6:31314347 | 2.86E-08 | 1.7733 |
| 6:32681161 | 2.97E-08 | 0.709  |
| 6:31300518 | 3.01E-08 | 1.7722 |
| 6:31112899 | 3.02E-08 | 1.4281 |
| 6:32198948 | 3.06E-08 | 0.6719 |
| 6:32294712 | 3.09E-08 | 0.6986 |
| 6:32294992 | 3.24E-08 | 0.6995 |
| 6:32305370 | 3.25E-08 | 0.6995 |
| 6:32200754 | 3.26E-08 | 0.6724 |
| 6:32336586 | 3.29E-08 | 0.6987 |
| 6:32260559 | 3.30E-08 | 0.6996 |
| 6:32331841 | 3.33E-08 | 0.6995 |
| 6:32336074 | 3.34E-08 | 0.6998 |
| 6:32301322 | 3.40E-08 | 0.6998 |
| 6:32305690 | 3.40E-08 | 0.6999 |
| 6:32313143 | 3.40E-08 | 0.6999 |
| 6:32278266 | 3.43E-08 | 0.6999 |
| 6:32299873 | 3.47E-08 | 0.7    |
| 6:32299715 | 3.49E-08 | 0.7    |
| 6:32304031 | 3.49E-08 | 0.7    |
| 6:32195935 | 3.52E-08 | 0.6839 |
| 6:32295350 | 3.59E-08 | 0.7002 |
| 6:32302067 | 3.63E-08 | 0.7004 |
| 6:32331824 | 3.63E-08 | 0.7001 |
| 6:32330153 | 3.65E-08 | 0.7005 |

|            |          |        |
|------------|----------|--------|
| 6:32313136 | 3.68E-08 | 0.7006 |
| 6:32312796 | 3.69E-08 | 0.7005 |
| 6:32309352 | 3.74E-08 | 0.7007 |
| 6:32313097 | 3.74E-08 | 0.7006 |
| 6:31315425 | 3.75E-08 | 1.7715 |
| 6:32307137 | 3.76E-08 | 0.7007 |
| 6:32317215 | 3.77E-08 | 0.7008 |
| 6:32317127 | 3.84E-08 | 0.701  |
| 6:32314676 | 3.85E-08 | 0.7008 |
| 6:32309864 | 3.88E-08 | 0.701  |
| 6:29942191 | 3.91E-08 | 1.4593 |
| 6:32315557 | 3.93E-08 | 0.7011 |
| 6:32313461 | 3.98E-08 | 0.701  |
| 6:32310684 | 4.10E-08 | 0.7011 |
| 6:32405192 | 4.39E-08 | 1.9529 |
| 6:32310967 | 4.59E-08 | 0.7019 |
| 6:32301514 | 4.90E-08 | 0.7029 |
| 6:32681277 | 4.94E-08 | 0.6941 |
| 6:32400088 | 5.20E-08 | 1.9519 |
| 6:32317471 | 5.36E-08 | 0.7036 |
| 6:32449411 | 5.45E-08 | 0.608  |
| 6:31139452 | 5.69E-08 | 1.3925 |
| 6:32282033 | 5.71E-08 | 0.7042 |
| 6:31318303 | 5.80E-08 | 1.7693 |
| 6:30171881 | 5.86E-08 | 1.4992 |
| 6:31837277 | 9.14E-08 | 1.3848 |
| 6:31348580 | 9.67E-08 | 1.3837 |
| 6:31838441 | 9.69E-08 | 1.3839 |
| 6:32261771 | 1.00E-07 | 0.709  |
| 6:30154928 | 1.19E-07 | 1.5213 |
| 6:32776854 | 1.40E-07 | 1.3792 |
| 6:29837188 | 1.53E-07 | 1.4062 |
| 6:32657578 | 1.55E-07 | 0.7078 |
| 6:32270500 | 1.60E-07 | 0.7123 |
| 6:30210807 | 1.67E-07 | 1.5246 |
| 6:32266535 | 1.67E-07 | 0.7126 |
| 6:31211050 | 1.70E-07 | 1.7438 |
| 6:32451526 | 1.70E-07 | 0.609  |
| 6:32318036 | 1.87E-07 | 0.7137 |
| 6:32317276 | 1.90E-07 | 0.7139 |
| 6:32778531 | 1.92E-07 | 1.3742 |
| 6:32765383 | 2.13E-07 | 1.3728 |
| 6:31348879 | 2.41E-07 | 1.3721 |

|            |          |        |
|------------|----------|--------|
| 6:30282332 | 2.42E-07 | 1.5139 |
| 6:30267748 | 2.45E-07 | 1.5088 |
| 6:32777216 | 2.46E-07 | 1.3698 |
| 6:32776976 | 2.58E-07 | 1.369  |
| 6:31235610 | 2.60E-07 | 1.7209 |
| 6:32191457 | 2.67E-07 | 0.6546 |
| 6:32775821 | 2.68E-07 | 1.3684 |
| 6:29842172 | 2.91E-07 | 1.3998 |
| 6:31919578 | 3.18E-07 | 1.3665 |
| 6:32763821 | 3.28E-07 | 1.367  |
| 6:32209861 | 3.70E-07 | 0.7103 |
| 6:30306553 | 3.90E-07 | 1.501  |
| 6:31232147 | 4.26E-07 | 1.72   |
| 6:32297417 | 4.42E-07 | 0.7235 |
| 6:32779996 | 5.23E-07 | 1.356  |
| 6:32723917 | 5.63E-07 | 0.7363 |
| 6:32609126 | 6.56E-07 | 1.3513 |
| 6:31021504 | 7.15E-07 | 1.3553 |
| 6:31483415 | 7.69E-07 | 1.3595 |
| 6:31481146 | 7.85E-07 | 1.3587 |
| 6:31481526 | 8.40E-07 | 1.3578 |
| 6:30061361 | 8.54E-07 | 1.5838 |
| 6:32626311 | 8.59E-07 | 0.7337 |
| 6:32808232 | 9.26E-07 | 1.3518 |
| 6:32605274 | 1.10E-06 | 1.3439 |
| 6:32341398 | 1.14E-06 | 0.6079 |
| 6:31301098 | 1.21E-06 | 1.346  |
| 6:32097611 | 1.32E-06 | 0.4994 |
| 6:32194854 | 1.35E-06 | 0.7283 |
| 6:31300968 | 1.42E-06 | 1.3421 |
| 6:32194609 | 1.58E-06 | 0.7301 |
| 6:32865997 | 1.59E-06 | 0.7359 |
| 6:32194751 | 1.60E-06 | 0.7302 |
| 6:32070074 | 1.62E-06 | 0.5023 |
| 6:32194740 | 1.62E-06 | 0.7302 |
| 6:32299592 | 1.72E-06 | 0.718  |
| 6:32663936 | 1.87E-06 | 0.5707 |
| 6:32629802 | 1.98E-06 | 1.3373 |
| 6:29938932 | 2.04E-06 | 1.3296 |
| 6:29939852 | 2.51E-06 | 1.3262 |
| 6:32629868 | 2.55E-06 | 0.5263 |
| 6:30116078 | 2.95E-06 | 1.4201 |
| 6:32561327 | 2.95E-06 | 1.5726 |

|            |          |        |
|------------|----------|--------|
| 6:31894626 | 3.03E-06 | 0.7408 |
| 6:31585219 | 3.10E-06 | 0.7388 |
| 6:31628733 | 3.17E-06 | 0.7502 |
| 6:31603591 | 3.18E-06 | 0.7505 |
| 6:31300414 | 3.23E-06 | 1.3279 |
| 6:31301944 | 3.39E-06 | 1.3291 |
| 6:30335350 | 3.52E-06 | 1.4545 |
| 6:31105633 | 3.63E-06 | 1.4637 |
| 6:31303236 | 3.66E-06 | 1.5189 |
| 6:31583155 | 4.02E-06 | 0.7426 |
| 6:29944004 | 4.21E-06 | 1.3221 |
| 6:29912517 | 4.47E-06 | 1.4144 |
| 6:32190620 | 4.55E-06 | 0.7197 |
| 6:31595487 | 4.67E-06 | 0.7431 |
| 6:29940260 | 4.77E-06 | 1.3153 |
| 6:32358513 | 4.82E-06 | 1.9841 |
| 6:29937924 | 5.19E-06 | 1.3783 |
| 6:29940750 | 5.23E-06 | 1.3157 |
| 6:29835073 | 5.51E-06 | 1.3573 |
| 6:29913542 | 5.57E-06 | 1.4089 |
| 6:31230882 | 5.76E-06 | 1.7073 |
| 6:29832332 | 6.29E-06 | 1.3735 |
| 6:29755451 | 7.50E-06 | 1.3434 |
| 6:32668105 | 7.58E-06 | 0.599  |
| 6:31235276 | 7.63E-06 | 1.7055 |
| 6:29815637 | 8.30E-06 | 1.4028 |
| 6:29777911 | 8.37E-06 | 1.4001 |
| 6:32415080 | 8.73E-06 | 0.6935 |
| 6:31303131 | 8.80E-06 | 1.6914 |
| 6:29812578 | 8.83E-06 | 1.4007 |
| 6:29799103 | 9.78E-06 | 1.3965 |
| 6:31469323 | 1.02E-05 | 1.31   |
| 6:31465103 | 1.07E-05 | 1.3094 |
| 6:29806107 | 1.08E-05 | 1.3959 |
| 6:31468546 | 1.10E-05 | 1.3088 |
| 6:32339076 | 1.14E-05 | 0.7365 |
| 6:32582577 | 1.16E-05 | 0.744  |
| 6:31005726 | 1.18E-05 | 1.7317 |
| 6:30077229 | 1.31E-05 | 1.31   |
| 6:31578772 | 1.32E-05 | 0.7507 |
| 6:32354644 | 1.33E-05 | 1.9741 |
| 6:32376788 | 1.46E-05 | 0.6757 |
| 6:29836577 | 1.53E-05 | 1.3646 |

|            |          |        |
|------------|----------|--------|
| 6:29840648 | 1.75E-05 | 1.3642 |
| 6:31232111 | 1.81E-05 | 1.6988 |
| 6:32256473 | 1.81E-05 | 0.716  |
| 6:32407310 | 1.96E-05 | 0.6419 |
| 6:29839816 | 1.99E-05 | 1.3636 |
| 6:31589676 | 2.02E-05 | 0.7555 |
| 6:31170914 | 2.07E-05 | 0.7622 |
| 6:31917540 | 2.11E-05 | 0.7517 |
| 6:31593476 | 2.15E-05 | 0.7557 |
| 6:31233270 | 2.18E-05 | 1.6974 |
| 6:29835834 | 2.20E-05 | 1.3595 |
| 6:32410691 | 2.21E-05 | 0.6906 |
| 6:31583827 | 2.22E-05 | 0.7562 |
| 6:31449022 | 2.23E-05 | 1.3072 |
| 6:31331166 | 2.63E-05 | 1.7189 |
| 6:31298681 | 2.81E-05 | 1.3094 |
| 6:29705772 | 2.97E-05 | 1.3599 |
| 6:32592862 | 2.99E-05 | 0.7095 |
| 6:32365580 | 3.03E-05 | 1.9638 |
| 6:31421297 | 3.21E-05 | 1.2855 |
| 6:31893944 | 3.29E-05 | 0.7746 |
| 6:32592845 | 3.37E-05 | 0.7096 |
| 6:31241537 | 3.39E-05 | 1.3032 |
| 6:30339602 | 3.43E-05 | 1.2892 |
| 6:32212264 | 3.47E-05 | 0.7203 |
| 6:31176335 | 3.49E-05 | 0.7643 |
| 6:29742809 | 3.50E-05 | 1.3576 |
| 6:32411376 | 3.65E-05 | 0.6956 |
| 6:32596324 | 3.66E-05 | 0.5667 |
| 6:32408842 | 3.91E-05 | 0.6968 |
| 6:31346193 | 4.11E-05 | 1.715  |
| 6:32099817 | 4.15E-05 | 0.7491 |
| 6:32804881 | 4.44E-05 | 1.4073 |
| 6:30455920 | 4.69E-05 | 1.3552 |
| 6:30414011 | 4.88E-05 | 1.3605 |
| 6:31342484 | 4.89E-05 | 1.7264 |
| 6:29730358 | 5.24E-05 | 1.3475 |
| 6:32590916 | 5.58E-05 | 0.5996 |
| 6:31240353 | 5.84E-05 | 1.7845 |
| 6:31165566 | 5.87E-05 | 1.802  |
| 6:32590899 | 5.90E-05 | 0.5995 |
| 6:31236998 | 5.96E-05 | 1.785  |
| 6:32590953 | 5.97E-05 | 0.5995 |



|            |           |        |
|------------|-----------|--------|
| 6:29704400 | 5.98E-05  | 1.281  |
| 6:29730730 | 6.00E-05  | 1.294  |
| 6:32195988 | 6.02E-05  | 0.7315 |
| 6:31130502 | 6.13E-05  | 1.3722 |
| 6:32203537 | 6.53E-05  | 0.7358 |
| 6:31461966 | 6.60E-05  | 1.5091 |
| 6:31330546 | 6.62E-05  | 1.7104 |
| 6:31129616 | 6.81E-05  | 1.3718 |
| 6:32410210 | 6.86E-05  | 0.7074 |
| 6:32412592 | 7.09E-05  | 0.708  |
| 6:32602483 | 7.51E-05  | 0.5563 |
| 6:31136453 | 7.55E-05  | 1.3717 |
| 6:32256418 | 7.55E-05  | 0.7322 |
| 6:32428285 | 7.63E-05  | 2.0693 |
| 6:31302904 | 7.64E-05  | 1.2708 |
| 6:31459972 | 7.90E-05  | 1.272  |
| 6:32210799 | 8.22E-05  | 0.7464 |
| 6:31350328 | 8.26E-05  | 1.4952 |
| 6:31130078 | 8.37E-05  | 1.371  |
| 6:30405956 | 8.41E-05  | 1.3442 |
| 6:32199239 | 8.62E-05  | 0.7404 |
| 6:31348516 | 8.66E-05  | 1.5096 |
| 6:29823606 | 8.88E-05  | 1.2946 |
| 6:32441100 | 8.97E-05  | 2.1084 |
| 6:29829986 | 9.65E-05  | 1.308  |
| 6:29833541 | 9.69E-05  | 1.2783 |
| 6:29732244 | 9.93E-05  | 1.303  |
| 6:32196313 | 0.0001014 | 0.7399 |
| 6:31304135 | 0.0001023 | 1.2654 |
| 6:31113842 | 0.0001026 | 1.5301 |
| 6:32734829 | 0.0001045 | 0.7516 |
| 6:32629963 | 0.0001062 | 0.5435 |
| 6:32101762 | 0.0001085 | 0.7594 |
| 6:32731258 | 0.0001087 | 0.7504 |
| 6:31350704 | 0.0001125 | 1.5127 |
| 6:31340620 | 0.0001131 | 1.6855 |
| 6:32197736 | 0.0001164 | 0.7459 |
| 6:32627700 | 0.0001189 | 0.5509 |
| 6:32376471 | 0.0001198 | 0.7228 |
| 6:32209963 | 0.000128  | 0.7513 |
| 6:29942045 | 0.0001344 | 0.7326 |
| 6:31518354 | 0.0001362 | 1.3452 |
| 6:32375374 | 0.0001369 | 0.7011 |

|            |           |        |
|------------|-----------|--------|
| 6:31207920 | 0.0001441 | 1.774  |
| 6:31147081 | 0.0001446 | 1.7918 |
| 6:32679462 | 0.0001476 | 0.747  |
| 6:31339871 | 0.0001489 | 1.6905 |
| 6:32431358 | 0.0001489 | 2.0528 |
| 6:31247067 | 0.0001532 | 1.7681 |
| 6:31161210 | 0.000155  | 1.7888 |
| 6:32447364 | 0.0001552 | 2.0526 |
| 6:32261507 | 0.0001571 | 0.7424 |
| 6:32375424 | 0.000163  | 0.7015 |
| 6:32244627 | 0.0001637 | 0.7424 |
| 6:32245827 | 0.0001637 | 0.7424 |
| 6:32198056 | 0.0001638 | 0.7486 |
| 6:31320810 | 0.0001644 | 1.5213 |
| 6:32083175 | 0.000165  | 0.7644 |
| 6:32375330 | 0.0001652 | 0.7099 |
| 6:32392945 | 0.0001664 | 0.7173 |
| 6:32255410 | 0.0001694 | 0.7437 |
| 6:32260350 | 0.0001729 | 0.7433 |
| 6:32582678 | 0.0001735 | 0.762  |
| 6:32394313 | 0.0001736 | 0.7229 |
| 6:32279284 | 0.000175  | 0.7439 |
| 6:32235177 | 0.0001752 | 0.7442 |
| 6:31888869 | 0.0001759 | 0.543  |
| 6:32238680 | 0.0001761 | 0.7442 |
| 6:32281676 | 0.0001765 | 0.7443 |
| 6:31919956 | 0.0001794 | 0.6126 |
| 6:32224139 | 0.0001797 | 0.7445 |
| 6:31136714 | 0.0001801 | 1.3616 |
| 6:32280344 | 0.000181  | 0.7447 |
| 6:32235096 | 0.0001814 | 0.7447 |
| 6:32199144 | 0.0001817 | 0.7362 |
| 6:32268701 | 0.0001837 | 0.7449 |
| 6:32375352 | 0.000185  | 0.7018 |
| 6:32230608 | 0.0001851 | 0.7449 |
| 6:32383441 | 0.0001872 | 0.7225 |
| 6:31135706 | 0.0001882 | 1.3621 |
| 6:31243971 | 0.0001895 | 1.4948 |
| 6:31244021 | 0.0001897 | 1.4947 |
| 6:31510924 | 0.0001913 | 0.7416 |
| 6:32732210 | 0.0001923 | 0.7495 |
| 6:32113980 | 0.0001925 | 0.7517 |
| 6:31898285 | 0.0001942 | 0.545  |

|            |           |        |
|------------|-----------|--------|
| 6:32804909 | 0.0001948 | 1.404  |
| 6:31244068 | 0.0001962 | 1.7644 |
| 6:29838099 | 0.0001978 | 1.369  |
| 6:32311459 | 0.0002014 | 0.6193 |
| 6:32234512 | 0.000202  | 0.7463 |
| 6:32278792 | 0.0002032 | 0.7466 |
| 6:32272327 | 0.0002081 | 0.7445 |
| 6:31185977 | 0.0002091 | 1.7793 |
| 6:32385605 | 0.0002095 | 0.7225 |
| 6:31928306 | 0.0002121 | 0.6159 |
| 6:31916951 | 0.0002193 | 0.6165 |
| 6:31136832 | 0.000225  | 1.3611 |
| 6:31890158 | 0.0002334 | 0.549  |
| 6:32273765 | 0.0002338 | 0.7456 |
| 6:32246156 | 0.000237  | 0.7491 |
| 6:32281360 | 0.0002383 | 0.7471 |
| 6:31919917 | 0.0002433 | 0.6192 |
| 6:31367865 | 0.0002449 | 0.7743 |
| 6:31536224 | 0.0002466 | 1.3234 |
| 6:32282081 | 0.0002481 | 0.7472 |
| 6:31910929 | 0.0002496 | 0.6197 |
| 6:32277211 | 0.0002524 | 0.7474 |
| 6:31245736 | 0.0002533 | 1.3681 |
| 6:32386061 | 0.0002534 | 0.7258 |
| 6:29728209 | 0.0002567 | 1.3037 |
| 6:31173678 | 0.0002583 | 1.7871 |
| 6:32387752 | 0.0002587 | 0.726  |
| 6:32279622 | 0.0002603 | 0.7482 |
| 6:32271807 | 0.000263  | 0.7483 |
| 6:32384677 | 0.0002665 | 0.7266 |
| 6:32385099 | 0.0002665 | 0.7266 |
| 6:32270875 | 0.0002669 | 0.7486 |
| 6:31351608 | 0.0002676 | 1.5757 |
| 6:32385653 | 0.0002686 | 0.7268 |
| 6:30162809 | 0.0002694 | 0.7579 |
| 6:30433611 | 0.0002717 | 1.3275 |
| 6:32385782 | 0.0002733 | 0.7271 |
| 6:32385873 | 0.0002749 | 0.7271 |
| 6:31910162 | 0.0002764 | 0.6219 |
| 6:32387860 | 0.0002764 | 0.7272 |
| 6:32385470 | 0.0002786 | 0.7275 |
| 6:32275194 | 0.00028   | 0.7493 |
| 6:32383858 | 0.0002802 | 0.7274 |

|            |           |        |
|------------|-----------|--------|
| 6:32388308 | 0.0002802 | 0.7274 |
| 6:32385573 | 0.0002813 | 0.7275 |
| 6:32626750 | 0.0002814 | 0.5213 |
| 6:32272510 | 0.0002823 | 0.7493 |
| 6:29704379 | 0.0002924 | 1.2975 |
| 6:31238259 | 0.0003001 | 1.4918 |
| 6:30152367 | 0.0003042 | 0.7603 |
| 6:31903121 | 0.0003071 | 0.5591 |
| 6:31604355 | 0.0003151 | 0.4413 |
| 6:31907147 | 0.0003213 | 0.6267 |
| 6:31081989 | 0.0003275 | 0.7816 |
| 6:31177915 | 0.0003299 | 1.7814 |
| 6:32383246 | 0.0003326 | 0.73   |
| 6:32383410 | 0.0003326 | 0.73   |
| 6:32383307 | 0.0003339 | 0.73   |
| 6:30033884 | 0.0003347 | 0.7518 |
| 6:31425499 | 0.0003348 | 0.7852 |
| 6:32283494 | 0.0003368 | 0.7526 |
| 6:31236567 | 0.0003467 | 1.4902 |
| 6:32383208 | 0.0003476 | 0.7305 |
| 6:32238013 | 0.0003479 | 0.7549 |
| 6:29706933 | 0.0003515 | 1.2961 |
| 6:29717980 | 0.000362  | 1.2926 |
| 6:29710963 | 0.0003673 | 1.2923 |
| 6:32953711 | 0.0003677 | 1.248  |
| 6:31907168 | 0.0003679 | 0.63   |
| 6:32030284 | 0.000371  | 0.7866 |
| 6:29938507 | 0.0003732 | 0.7405 |
| 6:31529883 | 0.0003732 | 1.3269 |
| 6:32038700 | 0.0003748 | 0.7865 |
| 6:32336364 | 0.0003784 | 0.7286 |
| 6:29724745 | 0.0003806 | 1.2913 |
| 6:29726015 | 0.0003816 | 1.2913 |
| 6:29708222 | 0.0003842 | 1.2913 |
| 6:31424778 | 0.0003869 | 0.7874 |
| 6:29713768 | 0.0003873 | 1.291  |
| 6:31531215 | 0.0003895 | 1.3274 |
| 6:31777946 | 0.0003903 | 0.7883 |
| 6:29732302 | 0.000391  | 1.2915 |
| 6:31417872 | 0.000391  | 0.8055 |
| 6:31905328 | 0.0003911 | 0.6312 |
| 6:32332322 | 0.0003916 | 0.7292 |
| 6:29730642 | 0.0003934 | 1.2907 |

|            |           |        |
|------------|-----------|--------|
| 6:32336766 | 0.0003939 | 0.7283 |
| 6:29943656 | 0.0004042 | 0.7846 |
| 6:30142690 | 0.0004073 | 0.765  |
| 6:29726423 | 0.0004125 | 1.2893 |
| 6:32409530 | 0.000415  | 1.8823 |
| 6:32804570 | 0.0004227 | 0.7892 |
| 6:31362930 | 0.0004314 | 0.787  |
| 6:29727023 | 0.0004446 | 1.2877 |
| 6:29730530 | 0.0004511 | 1.2878 |
| 6:29730546 | 0.0004511 | 1.2878 |
| 6:31419387 | 0.0004551 | 0.8078 |
| 6:29692562 | 0.0004556 | 1.2879 |
| 6:30743241 | 0.000456  | 1.2398 |
| 6:31418475 | 0.0004633 | 0.808  |
| 6:31729359 | 0.0004661 | 0.7894 |
| 6:31136666 | 0.0004688 | 1.3574 |
| 6:32335347 | 0.0004747 | 0.7332 |
| 6:32281889 | 0.0004762 | 0.7571 |
| 6:32590501 | 0.0004838 | 2.0428 |
| 6:32680070 | 0.0004841 | 0.7644 |
| 6:29923351 | 0.0004871 | 1.2573 |
| 6:32822186 | 0.0004934 | 0.5504 |
| 6:31416156 | 0.0004939 | 0.808  |
| 6:31446466 | 0.0005099 | 0.7909 |
| 6:32279340 | 0.0005274 | 0.7587 |
| 6:31143582 | 0.0005342 | 1.235  |
| 6:32235895 | 0.0005488 | 0.7593 |
| 6:32062687 | 0.0005602 | 0.7908 |
| 6:29944158 | 0.0005616 | 0.7317 |
| 6:30726748 | 0.0005669 | 1.2361 |
| 6:31022206 | 0.0005765 | 0.7829 |
| 6:30117913 | 0.000602  | 0.7793 |
| 6:32238219 | 0.0006046 | 0.761  |
| 6:32592219 | 0.0006134 | 2.0593 |
| 6:32681355 | 0.000625  | 0.7683 |
| 6:32255594 | 0.0006476 | 0.7622 |
| 6:32626130 | 0.000655  | 0.7883 |
| 6:31369151 | 0.0006701 | 0.7922 |
| 6:32255269 | 0.0006715 | 0.7628 |
| 6:32280182 | 0.0006732 | 0.7629 |
| 6:32257035 | 0.0006737 | 0.7628 |
| 6:32277934 | 0.0006752 | 0.7629 |
| 6:32161430 | 0.0006806 | 0.7465 |

|            |           |        |
|------------|-----------|--------|
| 6:32161366 | 0.0006862 | 0.7467 |
| 6:32243155 | 0.0006968 | 0.7639 |
| 6:31007590 | 0.0007092 | 1.2317 |
| 6:30095329 | 0.0007748 | 0.7751 |
| 6:30100221 | 0.0007824 | 0.7759 |
| 6:32066177 | 0.0007845 | 0.7961 |
| 6:31432125 | 0.0008026 | 0.665  |
| 6:30094788 | 0.0008113 | 0.7766 |
| 6:30115542 | 0.0008132 | 0.7763 |
| 6:32291643 | 0.0008444 | 0.7202 |
| 6:32268080 | 0.0008447 | 0.7675 |
| 6:32342537 | 0.0008585 | 0.7705 |
| 6:30855907 | 0.000868  | 0.8076 |
| 6:30115063 | 0.0008736 | 0.7776 |
| 6:31074030 | 0.0008757 | 1.2267 |
| 6:29987184 | 0.0008759 | 0.7485 |
| 6:31062667 | 0.0008831 | 1.2264 |
| 6:32105512 | 0.0008874 | 0.4859 |
| 6:30109412 | 0.0009022 | 0.7783 |
| 6:31786730 | 0.0009023 | 0.6519 |
| 6:31238297 | 0.0009046 | 1.4621 |
| 6:30028800 | 0.0009082 | 0.7488 |
| 6:30099951 | 0.000911  | 0.7785 |
| 6:30115965 | 0.0009129 | 0.7795 |
| 6:30114955 | 0.000921  | 0.7785 |
| 6:30094611 | 0.0009227 | 0.7778 |
| 6:29938455 | 0.0009231 | 0.7372 |
| 6:30119392 | 0.0009342 | 0.7854 |
| 6:30106493 | 0.0009413 | 0.7809 |
| 6:29938110 | 0.0009557 | 0.7371 |
| 6:32306419 | 0.0009652 | 0.6498 |
| 6:32263458 | 0.0009767 | 0.745  |
| 6:32702449 | 0.0009787 | 0.7687 |
| 6:29938174 | 0.0009791 | 0.737  |
| 6:29938487 | 0.0009837 | 0.7374 |
| 6:30094840 | 0.0009846 | 0.78   |
| 6:29938371 | 0.0009868 | 0.7373 |
| 6:30113955 | 0.0009869 | 0.7865 |
| 6:30112408 | 0.0009915 | 0.7804 |
| 6:30089280 | 0.0009925 | 0.7975 |
| 6:32313550 | 0.0009949 | 0.6595 |
| 6:29973526 | 0.0009983 | 0.7493 |
| 6:30121048 | 0.0009983 | 0.7798 |

|            |          |        |
|------------|----------|--------|
| 6:30104808 | 0.001    | 0.7815 |
| 6:30096717 | 0.001007 | 0.7804 |
| 6:32284340 | 0.001008 | 0.7455 |
| 6:32102231 | 0.001009 | 0.4635 |
| 6:30106296 | 0.001013 | 0.7804 |
| 6:32169574 | 0.001022 | 0.7951 |
| 6:30075864 | 0.001029 | 1.2211 |
| 6:30098609 | 0.001032 | 0.7809 |
| 6:30105349 | 0.001036 | 0.7808 |
| 6:32266795 | 0.001036 | 0.7461 |
| 6:30109482 | 0.001042 | 0.7809 |
| 6:30093744 | 0.001043 | 0.781  |
| 6:29731241 | 0.001044 | 1.2679 |
| 6:32338986 | 0.001053 | 0.7854 |
| 6:30118360 | 0.001068 | 0.7814 |
| 6:30103898 | 0.001073 | 0.7814 |
| 6:30104480 | 0.001074 | 0.7813 |
| 6:30103745 | 0.001077 | 0.7815 |
| 6:30108751 | 0.001077 | 0.7832 |
| 6:30110880 | 0.00108  | 0.7807 |
| 6:31430799 | 0.001087 | 0.6704 |
| 6:31843924 | 0.001093 | 0.8041 |
| 6:31335454 | 0.001095 | 0.7997 |
| 6:31107087 | 0.0011   | 1.3515 |
| 6:31354104 | 0.001101 | 0.8023 |
| 6:31114900 | 0.001102 | 1.3459 |
| 6:32358270 | 0.001102 | 0.7745 |
| 6:32317635 | 0.001107 | 0.6598 |
| 6:30118707 | 0.001111 | 0.7818 |
| 6:30114666 | 0.001114 | 0.7823 |
| 6:31351153 | 0.001125 | 1.2355 |
| 6:31335647 | 0.00113  | 0.8001 |
| 6:31107258 | 0.001134 | 1.3518 |
| 6:30103840 | 0.001135 | 0.7836 |
| 6:30109831 | 0.001138 | 0.789  |
| 6:30113427 | 0.001142 | 0.789  |
| 6:32583159 | 0.001145 | 0.6086 |
| 6:30108683 | 0.001148 | 0.7911 |
| 6:30112704 | 0.00115  | 0.7892 |
| 6:30112627 | 0.001151 | 0.7891 |
| 6:31353593 | 0.001152 | 0.803  |
| 6:29978352 | 0.001158 | 0.7482 |
| 6:32668258 | 0.00116  | 0.7907 |

|            |          |        |
|------------|----------|--------|
| 6:32092207 | 0.001162 | 0.4686 |
| 6:30113344 | 0.001176 | 0.7895 |
| 6:30112906 | 0.001179 | 0.7896 |
| 6:30105391 | 0.001184 | 0.7848 |
| 6:30118637 | 0.001186 | 0.7833 |
| 6:32317973 | 0.001188 | 0.6602 |
| 6:31844684 | 0.001192 | 0.6324 |
| 6:32333439 | 0.001196 | 0.7146 |
| 6:32310811 | 0.001197 | 0.6602 |
| 6:29724147 | 0.001202 | 1.2661 |
| 6:30117101 | 0.001205 | 0.7897 |
| 6:32312351 | 0.001207 | 0.6603 |
| 6:30115484 | 0.001211 | 0.7912 |
| 6:31238613 | 0.001213 | 1.471  |
| 6:32316604 | 0.001216 | 0.6603 |
| 6:31237048 | 0.001223 | 1.4695 |
| 6:30111014 | 0.001229 | 0.7903 |
| 6:30114101 | 0.001237 | 0.7916 |
| 6:31237124 | 0.001245 | 1.4701 |
| 6:31237664 | 0.001246 | 1.47   |
| 6:31115874 | 0.001252 | 1.3505 |
| 6:32688638 | 0.001255 | 0.7744 |
| 6:30110058 | 0.001282 | 0.7911 |
| 6:32671676 | 0.001291 | 0.7933 |
| 6:32669883 | 0.001299 | 0.7936 |
| 6:32324544 | 0.001305 | 0.7189 |
| 6:32980608 | 0.001306 | 1.2798 |
| 6:32669084 | 0.001307 | 0.7937 |
| 6:32669878 | 0.001307 | 0.7937 |
| 6:32670037 | 0.001307 | 0.7937 |
| 6:31361897 | 0.00131  | 0.8053 |
| 6:32121659 | 0.001316 | 0.4728 |
| 6:31237405 | 0.001319 | 1.4714 |
| 6:32671521 | 0.001321 | 0.7939 |
| 6:32668917 | 0.001327 | 0.794  |
| 6:32670978 | 0.001332 | 0.794  |
| 6:32669156 | 0.001343 | 0.7942 |
| 6:32668898 | 0.001365 | 0.7944 |
| 6:31006092 | 0.001386 | 1.2168 |
| 6:32682862 | 0.001391 | 0.7555 |
| 6:31366622 | 0.001408 | 0.8065 |
| 6:32666943 | 0.001415 | 0.7952 |
| 6:31111180 | 0.001418 | 1.3496 |



|            |          |        |
|------------|----------|--------|
| 6:32282854 | 0.00142  | 0.7712 |
| 6:31361710 | 0.001433 | 0.8068 |
| 6:31006855 | 0.001438 | 1.2158 |
| 6:32586221 | 0.001441 | 0.719  |
| 6:29937127 | 0.00145  | 0.7321 |
| 6:32667318 | 0.001485 | 0.7963 |
| 6:31585084 | 0.00149  | 0.8038 |
| 6:30120912 | 0.001492 | 0.7931 |
| 6:31008368 | 0.001511 | 1.2139 |
| 6:29940943 | 0.001513 | 0.7383 |
| 6:29936914 | 0.00153  | 0.7331 |
| 6:30760181 | 0.001543 | 0.8206 |
| 6:31366595 | 0.001553 | 0.8077 |
| 6:31114573 | 0.001557 | 1.2117 |
| 6:32985052 | 0.00156  | 1.2761 |
| 6:32313531 | 0.00157  | 0.6617 |
| 6:30008746 | 0.001571 | 0.7509 |
| 6:30900664 | 0.001573 | 1.21   |
| 6:30209802 | 0.001576 | 0.8054 |
| 6:31368964 | 0.001581 | 0.8082 |
| 6:31008818 | 0.001606 | 1.2129 |
| 6:29937580 | 0.001626 | 0.7438 |
| 6:31420500 | 0.001631 | 0.8219 |
| 6:32986782 | 0.001659 | 1.2737 |
| 6:31047620 | 0.00166  | 0.8227 |
| 6:32325399 | 0.001689 | 0.7145 |
| 6:32669439 | 0.001692 | 0.7982 |
| 6:31941557 | 0.001697 | 0.7202 |
| 6:32595063 | 0.001701 | 1.5409 |
| 6:31101674 | 0.001712 | 0.7721 |
| 6:30106202 | 0.001716 | 0.7917 |
| 6:31341379 | 0.001724 | 1.3598 |
| 6:29942386 | 0.001738 | 0.741  |
| 6:32987277 | 0.001746 | 1.2721 |
| 6:29943178 | 0.001747 | 0.7427 |
| 6:32093922 | 0.001747 | 0.5138 |
| 6:29935891 | 0.001755 | 0.7302 |
| 6:30575603 | 0.001778 | 1.2192 |
| 6:32330430 | 0.00181  | 0.7148 |
| 6:31005139 | 0.001814 | 1.2114 |
| 6:30010492 | 0.00182  | 0.7495 |
| 6:32593127 | 0.001851 | 0.645  |
| 6:32324817 | 0.001888 | 0.7149 |

|            |          |        |
|------------|----------|--------|
| 6:32136838 | 0.001896 | 0.7981 |
| 6:30120268 | 0.001899 | 0.7959 |
| 6:32585589 | 0.001914 | 0.7244 |
| 6:31328542 | 0.00193  | 1.5237 |
| 6:30760698 | 0.001953 | 0.8244 |
| 6:29942083 | 0.001961 | 0.7411 |
| 6:30120633 | 0.001974 | 0.7966 |
| 6:31331829 | 0.001991 | 1.4224 |
| 6:32659077 | 0.002007 | 0.8008 |
| 6:30006765 | 0.002016 | 0.7516 |
| 6:30075903 | 0.002037 | 0.7846 |
| 6:31340433 | 0.002045 | 1.362  |
| 6:32686103 | 0.002074 | 0.7813 |
| 6:30099996 | 0.002079 | 0.7974 |
| 6:31742067 | 0.002079 | 0.8148 |
| 6:31246703 | 0.002084 | 1.6751 |
| 6:31575276 | 0.002112 | 0.6277 |
| 6:29936351 | 0.002136 | 0.729  |
| 6:32686196 | 0.002142 | 0.7822 |
| 6:31641139 | 0.002143 | 0.8104 |
| 6:30005754 | 0.00215  | 0.7497 |
| 6:30120945 | 0.002167 | 0.7983 |
| 6:29928838 | 0.002169 | 0.7308 |
| 6:29942205 | 0.00217  | 0.7391 |
| 6:30094315 | 0.002172 | 0.7992 |
| 6:31622606 | 0.002183 | 0.8105 |
| 6:30097920 | 0.002185 | 0.7984 |
| 6:32686248 | 0.002187 | 0.7826 |
| 6:31609813 | 0.002192 | 0.8105 |
| 6:30111932 | 0.002205 | 0.7988 |
| 6:32688752 | 0.002233 | 0.783  |
| 6:30118582 | 0.002237 | 0.7711 |
| 6:29943281 | 0.002243 | 0.7418 |
| 6:32374595 | 0.002244 | 0.7558 |
| 6:31354287 | 0.002281 | 0.799  |
| 6:32586831 | 0.002292 | 0.6135 |
| 6:31354388 | 0.002302 | 0.7993 |
| 6:31726688 | 0.002327 | 0.8181 |
| 6:30209493 | 0.002332 | 0.8063 |
| 6:32680576 | 0.002349 | 0.7146 |
| 6:32680928 | 0.002362 | 0.7148 |
| 6:31359599 | 0.002381 | 0.7997 |
| 6:31936679 | 0.002383 | 0.7286 |

|            |          |        |
|------------|----------|--------|
| 6:32637696 | 0.002391 | 0.8071 |
| 6:30718180 | 0.002405 | 0.7677 |
| 6:32079567 | 0.002415 | 0.6306 |
| 6:29936408 | 0.002425 | 0.7262 |
| 6:29984252 | 0.002501 | 0.7457 |
| 6:30098323 | 0.002511 | 0.8008 |
| 6:31353950 | 0.002514 | 0.801  |
| 6:30097818 | 0.00254  | 0.8011 |
| 6:29930706 | 0.002547 | 0.7298 |
| 6:32405144 | 0.002553 | 0.5526 |
| 6:32319364 | 0.002569 | 0.7163 |
| 6:31353541 | 0.002592 | 0.8016 |
| 6:31353323 | 0.002612 | 0.8017 |
| 6:32973878 | 0.002686 | 1.2581 |
| 6:32332564 | 0.002732 | 0.7166 |
| 6:32333243 | 0.002732 | 0.7166 |
| 6:32333425 | 0.002732 | 0.7166 |
| 6:31354504 | 0.002736 | 0.803  |
| 6:31344273 | 0.002765 | 1.3439 |
| 6:30736151 | 0.002783 | 0.7679 |
| 6:30090820 | 0.002791 | 0.8021 |
| 6:32338695 | 0.002808 | 0.7175 |
| 6:30024677 | 0.002815 | 0.8032 |
| 6:31506210 | 0.002818 | 0.7561 |
| 6:31124849 | 0.002847 | 0.8344 |
| 6:32330695 | 0.002865 | 0.7543 |
| 6:31640518 | 0.002927 | 0.8182 |
| 6:32334754 | 0.002957 | 0.7538 |
| 6:32603355 | 0.003027 | 0.4909 |
| 6:31354560 | 0.003033 | 0.805  |
| 6:31935311 | 0.003056 | 0.7343 |
| 6:32097891 | 0.003064 | 0.5461 |
| 6:32179896 | 0.003115 | 0.7963 |
| 6:32973743 | 0.003119 | 1.2548 |
| 6:32961361 | 0.003145 | 0.7562 |
| 6:31360433 | 0.003151 | 0.8056 |
| 6:32304085 | 0.003175 | 0.7054 |
| 6:31354819 | 0.003182 | 0.8058 |
| 6:30890871 | 0.00326  | 1.1942 |
| 6:32326165 | 0.00326  | 0.718  |
| 6:32825090 | 0.003266 | 0.7704 |
| 6:32325358 | 0.003267 | 0.7561 |
| 6:31219982 | 0.003271 | 0.8125 |

|            |          |        |
|------------|----------|--------|
| 6:32375695 | 0.003327 | 0.7091 |
| 6:33006338 | 0.003332 | 1.2544 |
| 6:31601513 | 0.003384 | 0.8227 |
| 6:31355474 | 0.003391 | 0.8071 |
| 6:31934372 | 0.003396 | 0.7373 |
| 6:31933161 | 0.003406 | 0.7373 |
| 6:31634193 | 0.003414 | 0.8145 |
| 6:31607674 | 0.003472 | 0.6094 |
| 6:31355119 | 0.003492 | 0.8081 |
| 6:30889260 | 0.003518 | 1.1915 |
| 6:31510933 | 0.003527 | 0.7604 |
| 6:30731505 | 0.003585 | 0.774  |
| 6:31417191 | 0.00362  | 0.8188 |
| 6:29941431 | 0.003666 | 0.7431 |
| 6:31170713 | 0.003727 | 0.8364 |
| 6:30888161 | 0.003731 | 1.1901 |
| 6:30758861 | 0.003758 | 0.8351 |
| 6:33020168 | 0.00376  | 1.2841 |
| 6:30139699 | 0.003815 | 0.7911 |
| 6:31360526 | 0.003833 | 0.8095 |
| 6:32335433 | 0.003853 | 0.7604 |
| 6:30894759 | 0.003883 | 1.1895 |
| 6:30893941 | 0.003896 | 0.7899 |
| 6:30899524 | 0.003905 | 0.7907 |
| 6:32387809 | 0.003964 | 0.7477 |
| 6:32324945 | 0.003998 | 0.7189 |
| 6:31360341 | 0.004015 | 0.8104 |
| 6:32576036 | 0.004022 | 0.6232 |
| 6:31361485 | 0.004032 | 0.8105 |
| 6:31360255 | 0.004218 | 0.8113 |
| 6:32911814 | 0.004223 | 1.1979 |
| 6:32050067 | 0.004283 | 0.7415 |
| 6:30800577 | 0.004298 | 0.8084 |
| 6:30040084 | 0.004302 | 0.738  |
| 6:32170433 | 0.004337 | 0.7413 |
| 6:30758555 | 0.004363 | 0.7794 |
| 6:30900150 | 0.004401 | 0.7936 |
| 6:30758466 | 0.004427 | 0.8375 |
| 6:31022489 | 0.004487 | 0.8047 |
| 6:32668667 | 0.004509 | 0.8153 |
| 6:30764420 | 0.004514 | 0.7797 |
| 6:32569691 | 0.004541 | 0.7611 |
| 6:29937833 | 0.004662 | 1.2371 |

|            |          |        |
|------------|----------|--------|
| 6:31026009 | 0.004706 | 0.8052 |
| 6:31592064 | 0.004779 | 0.6239 |
| 6:31583224 | 0.004796 | 0.6241 |
| 6:31669295 | 0.004828 | 0.6245 |
| 6:31024738 | 0.004855 | 0.8065 |
| 6:31025848 | 0.004882 | 0.8066 |
| 6:31095270 | 0.004907 | 0.7715 |
| 6:32070838 | 0.004907 | 0.5497 |
| 6:31034264 | 0.004912 | 0.8068 |
| 6:31038963 | 0.004915 | 0.8066 |
| 6:31024673 | 0.004968 | 0.8069 |
| 6:32798350 | 0.004985 | 0.7497 |
| 6:31029173 | 0.004996 | 0.8071 |
| 6:31352631 | 0.005091 | 0.8281 |
| 6:31628216 | 0.005107 | 0.6266 |
| 6:31616366 | 0.005155 | 0.8228 |
| 6:31025989 | 0.005198 | 0.8075 |
| 6:32345514 | 0.005211 | 0.7413 |
| 6:31106177 | 0.005262 | 0.8125 |
| 6:31230701 | 0.005266 | 1.4442 |
| 6:33016033 | 0.005316 | 1.2681 |
| 6:32321004 | 0.005383 | 0.7693 |
| 6:31162520 | 0.005386 | 0.8426 |
| 6:31168494 | 0.005388 | 0.8424 |
| 6:31339240 | 0.005464 | 1.4194 |
| 6:31167512 | 0.00555  | 0.8431 |
| 6:32669373 | 0.005563 | 0.5566 |
| 6:31031904 | 0.005569 | 0.8062 |
| 6:31513402 | 0.005608 | 0.7783 |
| 6:31333499 | 0.005615 | 1.1879 |
| 6:31036253 | 0.005703 | 0.8066 |
| 6:32838949 | 0.005735 | 0.759  |
| 6:33002354 | 0.005758 | 1.2676 |
| 6:32837696 | 0.005779 | 0.759  |
| 6:30104783 | 0.005907 | 0.7734 |
| 6:32840139 | 0.006003 | 0.7588 |
| 6:30815035 | 0.006016 | 0.8007 |
| 6:32367722 | 0.006074 | 0.7421 |
| 6:32843238 | 0.006078 | 0.7595 |
| 6:30297529 | 0.006132 | 1.2064 |
| 6:31318144 | 0.006172 | 0.7966 |
| 6:31331257 | 0.006173 | 1.1848 |
| 6:32841319 | 0.00618  | 0.7603 |

|            |          |        |
|------------|----------|--------|
| 6:31240692 | 0.006187 | 0.8408 |
| 6:32835615 | 0.006238 | 0.7596 |
| 6:31617957 | 0.006241 | 0.8245 |
| 6:32342129 | 0.006261 | 0.7476 |
| 6:32368087 | 0.006272 | 0.7343 |
| 6:30794346 | 0.006277 | 0.8326 |
| 6:31265490 | 0.006284 | 1.4491 |
| 6:32865911 | 0.006302 | 0.7834 |
| 6:32736936 | 0.006305 | 0.7997 |
| 6:33020842 | 0.00636  | 1.2452 |
| 6:32830013 | 0.006381 | 0.7387 |
| 6:31098832 | 0.006389 | 1.4079 |
| 6:32346794 | 0.006451 | 0.7456 |
| 6:31451680 | 0.006458 | 0.8052 |
| 6:30773899 | 0.006473 | 0.8326 |
| 6:32838584 | 0.006476 | 0.7593 |
| 6:32602518 | 0.006478 | 0.4982 |
| 6:32687570 | 0.006488 | 0.7866 |
| 6:32208843 | 0.006497 | 0.6304 |
| 6:32665597 | 0.00651  | 0.688  |
| 6:31336349 | 0.006575 | 1.3366 |
| 6:31015182 | 0.00661  | 0.8471 |
| 6:32371269 | 0.006615 | 0.7537 |
| 6:31175015 | 0.006631 | 0.8135 |
| 6:31618121 | 0.006671 | 0.8235 |
| 6:32833646 | 0.006755 | 0.7395 |
| 6:32838664 | 0.006763 | 0.7574 |
| 6:32341473 | 0.006791 | 0.7431 |
| 6:30076630 | 0.006819 | 0.8468 |
| 6:32207512 | 0.006832 | 0.6327 |
| 6:31025271 | 0.006992 | 0.8111 |
| 6:32635949 | 0.00704  | 0.8268 |
| 6:31027510 | 0.007047 | 0.8113 |
| 6:31337671 | 0.00709  | 1.4077 |
| 6:32331998 | 0.007093 | 0.7217 |
| 6:30438226 | 0.007099 | 0.8127 |
| 6:31255286 | 0.007157 | 0.8403 |
| 6:32208324 | 0.007178 | 0.8299 |
| 6:32177900 | 0.007192 | 0.8252 |
| 6:32822858 | 0.007207 | 0.7383 |
| 6:32357165 | 0.007211 | 0.7437 |
| 6:31315120 | 0.007212 | 0.8455 |
| 6:30782105 | 0.007216 | 0.8349 |

|            |          |        |
|------------|----------|--------|
| 6:32358231 | 0.007401 | 0.7435 |
| 6:31081251 | 0.007419 | 0.7403 |
| 6:31260218 | 0.007436 | 0.841  |
| 6:31330411 | 0.007445 | 1.3352 |
| 6:31272261 | 0.007446 | 1.4507 |
| 6:33004387 | 0.007501 | 1.2627 |
| 6:32208921 | 0.007513 | 0.6566 |
| 6:30791971 | 0.007546 | 0.8361 |
| 6:32626730 | 0.007567 | 0.5223 |
| 6:30786676 | 0.00757  | 0.836  |
| 6:31446796 | 0.007581 | 0.8081 |
| 6:32344973 | 0.007588 | 0.7437 |
| 6:32207483 | 0.00761  | 0.637  |
| 6:31259387 | 0.007633 | 0.8414 |
| 6:31340328 | 0.007661 | 1.4234 |
| 6:30448668 | 0.007673 | 0.815  |
| 6:29702709 | 0.007709 | 1.1787 |
| 6:30782235 | 0.007719 | 0.8362 |
| 6:31340559 | 0.007728 | 1.4241 |
| 6:31343604 | 0.007749 | 1.4078 |
| 6:32351901 | 0.007771 | 0.7438 |
| 6:31483458 | 0.007832 | 0.8421 |
| 6:30862423 | 0.007886 | 0.8077 |
| 6:31620020 | 0.007901 | 0.8231 |
| 6:32825348 | 0.007975 | 0.7369 |
| 6:30777604 | 0.008069 | 0.8373 |
| 6:31540071 | 0.008122 | 0.738  |
| 6:31430359 | 0.008165 | 1.3297 |
| 6:31344348 | 0.008187 | 1.4063 |
| 6:31337850 | 0.008205 | 1.4174 |
| 6:30829522 | 0.008206 | 0.807  |
| 6:31095864 | 0.008249 | 1.4038 |
| 6:31671498 | 0.008369 | 0.7563 |
| 6:31013085 | 0.008385 | 0.8502 |
| 6:30782407 | 0.008413 | 0.8381 |
| 6:31345021 | 0.008459 | 1.4058 |
| 6:30778203 | 0.008503 | 0.8383 |
| 6:30781923 | 0.008534 | 0.8384 |
| 6:30315210 | 0.008567 | 1.1987 |
| 6:32349711 | 0.008646 | 0.7444 |
| 6:30077967 | 0.008686 | 0.791  |
| 6:30767013 | 0.008765 | 0.8381 |
| 6:30121185 | 0.008954 | 0.8315 |

|            |          |        |
|------------|----------|--------|
| 6:31345876 | 0.00902  | 1.4048 |
| 6:32349946 | 0.009053 | 0.7447 |
| 6:30302600 | 0.009105 | 1.1977 |
| 6:31448625 | 0.009111 | 0.8127 |
| 6:32367847 | 0.00919  | 0.7367 |
| 6:30215592 | 0.009315 | 0.8181 |
| 6:32998729 | 0.009325 | 0.8488 |
| 6:32740411 | 0.009423 | 0.6871 |
| 6:31447135 | 0.009436 | 0.8131 |
| 6:32838269 | 0.009535 | 0.7624 |
| 6:32830568 | 0.009559 | 0.7485 |
| 6:32586639 | 0.009563 | 0.7331 |
| 6:30179422 | 0.009639 | 0.7956 |
| 6:29937104 | 0.009703 | 0.7279 |
| 6:31602967 | 0.009779 | 0.8302 |
| 6:31089125 | 0.009791 | 1.4114 |
| 6:32368314 | 0.009912 | 0.7453 |
| 6:29700079 | 0.01007  | 1.1786 |
| 6:30271334 | 0.01024  | 0.769  |
| 6:31333303 | 0.01025  | 0.7861 |
| 6:31428967 | 0.01028  | 1.501  |
| 6:32370616 | 0.0103   | 0.7456 |
| 6:31688217 | 0.01042  | 0.8066 |
| 6:32370684 | 0.01047  | 0.7457 |
| 6:30768636 | 0.01048  | 0.8417 |
| 6:31269262 | 0.0105   | 0.841  |
| 6:30768412 | 0.0106   | 0.8419 |
| 6:31126790 | 0.01072  | 1.1654 |
| 6:31085882 | 0.01073  | 1.4098 |
| 6:31087934 | 0.01073  | 1.4098 |
| 6:31088856 | 0.01073  | 1.4098 |
| 6:31515799 | 0.01087  | 0.7371 |
| 6:30767947 | 0.01088  | 0.8424 |
| 6:31525184 | 0.01094  | 0.7465 |
| 6:32822269 | 0.01097  | 0.7411 |
| 6:31273745 | 0.01102  | 0.8523 |
| 6:31083813 | 0.01107  | 1.3998 |
| 6:29935590 | 0.01132  | 0.7298 |
| 6:31274380 | 0.01132  | 0.7022 |
| 6:31087908 | 0.01137  | 1.4088 |
| 6:31252396 | 0.0114   | 1.4522 |
| 6:31540313 | 0.0116   | 0.7306 |
| 6:31011013 | 0.01175  | 0.8558 |



|            |         |        |
|------------|---------|--------|
| 6:31234114 | 0.01175 | 0.8306 |
| 6:32363816 | 0.01176 | 0.6437 |
| 6:31447588 | 0.01177 | 0.819  |
| 6:31017334 | 0.01181 | 1.2257 |
| 6:31373445 | 0.01196 | 0.5867 |
| 6:32846570 | 0.01199 | 0.7647 |
| 6:31431780 | 0.01207 | 0.5806 |
| 6:31692163 | 0.01212 | 0.8059 |
| 6:31236115 | 0.01213 | 1.4054 |
| 6:31528130 | 0.01222 | 0.754  |
| 6:29700615 | 0.01235 | 1.1754 |
| 6:31230800 | 0.01243 | 0.8318 |
| 6:29699784 | 0.0125  | 1.1774 |
| 6:31266767 | 0.01263 | 0.8443 |
| 6:31012466 | 0.01264 | 0.8573 |
| 6:32194339 | 0.01266 | 0.8181 |
| 6:30764241 | 0.0127  | 0.8072 |
| 6:32682812 | 0.01277 | 0.7882 |
| 6:31100768 | 0.01282 | 1.3547 |
| 6:31834197 | 0.01284 | 1.4818 |
| 6:30768955 | 0.01286 | 0.8453 |
| 6:31233510 | 0.01297 | 0.833  |
| 6:32179709 | 0.01297 | 0.6698 |
| 6:31088579 | 0.01298 | 1.3975 |
| 6:30313268 | 0.013   | 0.7625 |
| 6:32915823 | 0.01303 | 0.6404 |
| 6:32693506 | 0.01305 | 0.6775 |
| 6:32376746 | 0.01311 | 0.7472 |
| 6:32188383 | 0.01326 | 0.7706 |
| 6:31085269 | 0.01336 | 1.397  |
| 6:30314116 | 0.01342 | 0.7627 |
| 6:31207692 | 0.01379 | 1.3033 |
| 6:31228634 | 0.01401 | 0.8358 |
| 6:33034596 | 0.01405 | 0.7869 |
| 6:32361111 | 0.01415 | 0.6482 |
| 6:32209198 | 0.01425 | 0.6939 |
| 6:32934441 | 0.01468 | 1.1584 |
| 6:30993958 | 0.01473 | 1.6198 |
| 6:31018407 | 0.01474 | 1.2248 |
| 6:31128552 | 0.01477 | 1.2807 |
| 6:31267515 | 0.01483 | 0.8495 |
| 6:31312538 | 0.01505 | 0.7719 |
| 6:32569667 | 0.01507 | 0.6306 |

|            |         |        |
|------------|---------|--------|
| 6:31126944 | 0.01516 | 1.1576 |
| 6:30232514 | 0.01539 | 1.1834 |
| 6:29944314 | 0.01548 | 1.286  |
| 6:31257511 | 0.01567 | 1.444  |
| 6:31145116 | 0.01584 | 0.853  |
| 6:32196873 | 0.01588 | 0.725  |
| 6:32192617 | 0.016   | 0.6661 |
| 6:31020821 | 0.01604 | 1.2404 |
| 6:32218989 | 0.01629 | 0.7179 |
| 6:32942302 | 0.01632 | 1.1558 |
| 6:31528951 | 0.01698 | 0.7819 |
| 6:32219725 | 0.01698 | 0.7182 |
| 6:30154199 | 0.01704 | 0.7952 |
| 6:32350868 | 0.01708 | 0.6505 |
| 6:31675765 | 0.01719 | 0.8077 |
| 6:31235869 | 0.01749 | 0.8395 |
| 6:32379489 | 0.0176  | 0.7477 |
| 6:32948426 | 0.01774 | 0.7435 |
| 6:31601012 | 0.0178  | 0.8331 |
| 6:31346898 | 0.01782 | 1.5976 |
| 6:32218681 | 0.01791 | 0.7187 |
| 6:31221698 | 0.01792 | 0.8423 |
| 6:31133509 | 0.01794 | 1.2724 |
| 6:31710020 | 0.01817 | 0.8092 |
| 6:31463333 | 0.01828 | 0.768  |
| 6:32354428 | 0.0184  | 0.651  |
| 6:31463208 | 0.01845 | 0.7651 |
| 6:32845873 | 0.01852 | 0.7561 |
| 6:32974401 | 0.0186  | 0.8639 |
| 6:32590925 | 0.01866 | 0.836  |
| 6:31114182 | 0.01886 | 0.8533 |
| 6:32658079 | 0.01899 | 0.7915 |
| 6:32299822 | 0.01902 | 0.6897 |
| 6:32626179 | 0.01932 | 0.6348 |
| 6:32925692 | 0.01932 | 1.1516 |
| 6:32848168 | 0.01934 | 0.7722 |
| 6:31132140 | 0.01953 | 0.8666 |
| 6:32848566 | 0.01964 | 0.7674 |
| 6:31094636 | 0.01972 | 0.8065 |
| 6:30309508 | 0.01981 | 1.1758 |
| 6:30796738 | 0.01996 | 1.4719 |
| 6:32363955 | 0.01997 | 0.6521 |
| 6:31482203 | 0.01999 | 0.6856 |

|            |         |        |
|------------|---------|--------|
| 6:30270609 | 0.0201  | 1.1763 |
| 6:31118019 | 0.02015 | 0.8548 |
| 6:32298814 | 0.02041 | 0.6905 |
| 6:31132649 | 0.02051 | 1.2719 |
| 6:29941943 | 0.02058 | 0.7893 |
| 6:30235184 | 0.02061 | 1.1747 |
| 6:31267516 | 0.02064 | 0.856  |
| 6:31190977 | 0.02065 | 0.6125 |
| 6:32367795 | 0.02069 | 0.6908 |
| 6:32626037 | 0.02075 | 0.6362 |
| 6:30234494 | 0.02076 | 1.1746 |
| 6:30275124 | 0.02086 | 1.1752 |
| 6:32597022 | 0.0209  | 0.8229 |
| 6:30264307 | 0.0212  | 1.1749 |
| 6:31561747 | 0.0212  | 0.546  |
| 6:30142458 | 0.02128 | 0.7978 |
| 6:31778077 | 0.02135 | 1.4371 |
| 6:32591629 | 0.02135 | 0.6791 |
| 6:31463926 | 0.02153 | 0.7651 |
| 6:31546789 | 0.02174 | 0.6266 |
| 6:32586134 | 0.02175 | 0.7394 |
| 6:29970427 | 0.02178 | 1.3326 |
| 6:31437305 | 0.02183 | 0.7168 |
| 6:32581491 | 0.02187 | 0.6356 |
| 6:29939240 | 0.02196 | 1.2441 |
| 6:32194308 | 0.02197 | 0.7382 |
| 6:32851507 | 0.02198 | 0.7686 |
| 6:32581628 | 0.02199 | 0.6803 |
| 6:32849639 | 0.02206 | 0.7696 |
| 6:30240926 | 0.0222  | 1.1723 |
| 6:31186534 | 0.0222  | 0.7269 |
| 6:31314781 | 0.02229 | 0.7656 |
| 6:31464050 | 0.02261 | 0.7651 |
| 6:30155131 | 0.02265 | 0.799  |
| 6:30259657 | 0.02279 | 1.1717 |
| 6:31472459 | 0.02279 | 0.6605 |
| 6:31568469 | 0.02293 | 0.8329 |
| 6:32350454 | 0.02294 | 0.6216 |
| 6:32575983 | 0.02317 | 0.6809 |
| 6:31266730 | 0.02335 | 0.8589 |
| 6:30778786 | 0.02342 | 0.8281 |
| 6:31480398 | 0.02363 | 0.6857 |
| 6:29942126 | 0.02364 | 0.7895 |

|            |         |        |
|------------|---------|--------|
| 6:30202442 | 0.02364 | 0.8009 |
| 6:31347144 | 0.02367 | 0.8524 |
| 6:31198987 | 0.02373 | 1.2208 |
| 6:32844523 | 0.02394 | 0.7729 |
| 6:32585574 | 0.02398 | 0.737  |
| 6:30316739 | 0.02404 | 1.1703 |
| 6:31643522 | 0.02406 | 0.6541 |
| 6:29734098 | 0.02413 | 0.7439 |
| 6:30808762 | 0.02416 | 0.8693 |
| 6:31481299 | 0.02434 | 0.6859 |
| 6:31221299 | 0.0246  | 0.7992 |
| 6:31406811 | 0.0246  | 0.811  |
| 6:30155313 | 0.02469 | 0.7946 |
| 6:30202429 | 0.02469 | 0.8012 |
| 6:30773349 | 0.02469 | 0.822  |
| 6:30230128 | 0.02478 | 1.1687 |
| 6:32713867 | 0.02479 | 0.8278 |
| 6:30228938 | 0.02481 | 1.1687 |
| 6:31189543 | 0.02499 | 0.6149 |
| 6:32434639 | 0.0251  | 0.7697 |
| 6:31189798 | 0.02512 | 0.615  |
| 6:32109979 | 0.02514 | 0.7992 |
| 6:32850850 | 0.02514 | 0.7676 |
| 6:30157654 | 0.02515 | 0.7948 |
| 6:30201955 | 0.02518 | 0.8014 |
| 6:32430729 | 0.02519 | 0.7706 |
| 6:30112623 | 0.0252  | 0.7745 |
| 6:32439508 | 0.0252  | 0.7697 |
| 6:32351510 | 0.02524 | 0.6007 |
| 6:31198801 | 0.02529 | 0.5671 |
| 6:31231989 | 0.02533 | 0.8666 |
| 6:30193513 | 0.02534 | 0.7965 |
| 6:30229922 | 0.02536 | 1.168  |
| 6:31267812 | 0.02538 | 0.8608 |
| 6:30231108 | 0.02544 | 1.168  |
| 6:31204491 | 0.02546 | 0.5672 |
| 6:32188099 | 0.02555 | 0.8111 |
| 6:32216236 | 0.02557 | 0.7406 |
| 6:31646398 | 0.02564 | 0.8124 |
| 6:30188199 | 0.02566 | 0.8015 |
| 6:30199512 | 0.02569 | 0.7966 |
| 6:31186904 | 0.02589 | 0.6153 |
| 6:31388109 | 0.02604 | 0.8133 |

|            |         |        |
|------------|---------|--------|
| 6:32431129 | 0.02614 | 0.7703 |
| 6:31189006 | 0.02616 | 0.6155 |
| 6:32440487 | 0.02622 | 0.6913 |
| 6:30194531 | 0.02634 | 0.7949 |
| 6:31602489 | 0.02636 | 0.8135 |
| 6:32850839 | 0.02641 | 0.7815 |
| 6:31176602 | 0.02651 | 0.7717 |
| 6:30199067 | 0.02653 | 0.7969 |
| 6:32432615 | 0.02663 | 0.7736 |
| 6:30194103 | 0.02665 | 0.7969 |
| 6:30145740 | 0.0267  | 0.8006 |
| 6:30270080 | 0.0267  | 1.1674 |
| 6:32431105 | 0.02688 | 0.7712 |
| 6:31269022 | 0.0269  | 0.8623 |
| 6:30146650 | 0.02698 | 0.8002 |
| 6:30175847 | 0.02707 | 0.8005 |
| 6:32430167 | 0.02712 | 0.7706 |
| 6:30196855 | 0.02714 | 0.7971 |
| 6:32428804 | 0.02718 | 0.7691 |
| 6:32289594 | 0.02735 | 0.7845 |
| 6:32085278 | 0.02744 | 0.5922 |
| 6:30237859 | 0.02749 | 0.7837 |
| 6:31262169 | 0.02754 | 0.8617 |
| 6:30229830 | 0.02766 | 1.1655 |
| 6:32434939 | 0.02769 | 0.7706 |
| 6:32429739 | 0.02777 | 0.77   |
| 6:30159854 | 0.02778 | 0.8019 |
| 6:31445771 | 0.02788 | 0.6377 |
| 6:31409857 | 0.0282  | 0.8159 |
| 6:32432858 | 0.02834 | 0.7707 |
| 6:30797083 | 0.02852 | 0.8272 |
| 6:31611840 | 0.02869 | 0.8158 |
| 6:31204008 | 0.02891 | 0.8326 |
| 6:30196313 | 0.02901 | 0.7976 |
| 6:31407828 | 0.02904 | 0.8164 |
| 6:31618723 | 0.0291  | 0.6567 |
| 6:31198896 | 0.02911 | 0.8335 |
| 6:32825379 | 0.02914 | 0.7676 |
| 6:30181275 | 0.02922 | 0.7973 |
| 6:30179026 | 0.02929 | 0.7963 |
| 6:30179152 | 0.02929 | 0.7963 |
| 6:31384578 | 0.02935 | 0.8169 |
| 6:32432664 | 0.02936 | 0.7712 |

|            |         |        |
|------------|---------|--------|
| 6:32345086 | 0.02943 | 0.7642 |
| 6:30785886 | 0.02957 | 0.8285 |
| 6:31632686 | 0.02958 | 0.817  |
| 6:32787056 | 0.02971 | 0.7691 |
| 6:29722515 | 0.02972 | 0.767  |
| 6:30770732 | 0.02972 | 0.8251 |
| 6:31544642 | 0.02973 | 0.6695 |
| 6:32823257 | 0.02974 | 0.766  |
| 6:32373796 | 0.0298  | 0.6349 |
| 6:31352348 | 0.02986 | 0.5189 |
| 6:32438598 | 0.02994 | 0.7714 |
| 6:31379168 | 0.03002 | 0.6623 |
| 6:30791409 | 0.03003 | 0.8288 |
| 6:32626475 | 0.03012 | 0.8603 |
| 6:30178287 | 0.03021 | 0.7983 |
| 6:32663919 | 0.0303  | 0.5986 |
| 6:30571471 | 0.03051 | 1.1407 |
| 6:31054511 | 0.03051 | 0.8682 |
| 6:30229990 | 0.03061 | 1.1623 |
| 6:31347458 | 0.03063 | 0.5194 |
| 6:32626272 | 0.03064 | 0.8607 |
| 6:32952546 | 0.03064 | 1.1396 |
| 6:31258837 | 0.03097 | 0.8723 |
| 6:32626302 | 0.03106 | 0.8611 |
| 6:32147696 | 0.0311  | 0.8318 |
| 6:31340767 | 0.03111 | 0.5208 |
| 6:31347213 | 0.03123 | 0.5202 |
| 6:31220450 | 0.03128 | 0.855  |
| 6:30145083 | 0.03136 | 0.8019 |
| 6:31273495 | 0.0314  | 1.219  |
| 6:30846830 | 0.03153 | 0.8721 |
| 6:31334477 | 0.03161 | 0.52   |
| 6:30787175 | 0.03165 | 0.8305 |
| 6:31145839 | 0.03176 | 0.8746 |
| 6:31338768 | 0.03192 | 0.5252 |
| 6:31145271 | 0.032   | 0.875  |
| 6:31327452 | 0.0321  | 1.5637 |
| 6:31354387 | 0.03231 | 0.5203 |
| 6:31177458 | 0.03234 | 0.7732 |
| 6:32434830 | 0.03238 | 0.7722 |
| 6:30155108 | 0.03239 | 0.7975 |
| 6:30203602 | 0.03241 | 0.7893 |
| 6:30782361 | 0.03247 | 0.8321 |

|            |         |        |
|------------|---------|--------|
| 6:31323027 | 0.03247 | 1.5758 |
| 6:31326072 | 0.03248 | 0.5749 |
| 6:31328528 | 0.03263 | 1.5616 |
| 6:31240721 | 0.03264 | 0.7267 |
| 6:31355603 | 0.03287 | 1.5466 |
| 6:30191587 | 0.03291 | 0.798  |
| 6:30769837 | 0.03334 | 0.8286 |
| 6:30832063 | 0.03349 | 0.876  |
| 6:30190640 | 0.03351 | 0.799  |
| 6:31016848 | 0.03367 | 0.6015 |
| 6:31249977 | 0.03378 | 0.8732 |
| 6:30837646 | 0.03381 | 0.8738 |
| 6:31345815 | 0.03382 | 1.543  |
| 6:30790604 | 0.03383 | 0.8324 |
| 6:30790798 | 0.03383 | 0.8324 |
| 6:30793314 | 0.03392 | 0.8324 |
| 6:31268965 | 0.03404 | 1.2274 |
| 6:33039625 | 0.0341  | 0.8658 |
| 6:32923993 | 0.03414 | 0.7697 |
| 6:32357339 | 0.03417 | 0.7011 |
| 6:32325658 | 0.03431 | 0.6479 |
| 6:31587938 | 0.03447 | 0.821  |
| 6:32739888 | 0.03467 | 0.8453 |
| 6:32306922 | 0.03468 | 0.6489 |
| 6:32219041 | 0.0347  | 0.6487 |
| 6:32951662 | 0.03498 | 0.7706 |
| 6:31334852 | 0.03507 | 0.8543 |
| 6:29826092 | 0.0351  | 0.7298 |
| 6:32664093 | 0.03521 | 0.6001 |
| 6:30796073 | 0.03546 | 0.8337 |
| 6:30844260 | 0.03592 | 0.8773 |
| 6:32923988 | 0.03595 | 0.7717 |
| 6:32834732 | 0.03608 | 1.151  |
| 6:32590529 | 0.03629 | 0.5936 |
| 6:29820278 | 0.03639 | 0.749  |
| 6:30789799 | 0.03658 | 0.8349 |
| 6:32758394 | 0.03671 | 0.8395 |
| 6:29736163 | 0.03672 | 0.718  |
| 6:32934409 | 0.03682 | 0.7726 |
| 6:32818678 | 0.03692 | 1.155  |
| 6:32657452 | 0.03706 | 0.6007 |
| 6:30785273 | 0.03712 | 0.835  |
| 6:29828660 | 0.03714 | 0.7307 |

|            |         |        |
|------------|---------|--------|
| 6:31144429 | 0.03734 | 0.8786 |
| 6:31014305 | 0.03744 | 0.6024 |
| 6:31145702 | 0.03744 | 0.8786 |
| 6:32792973 | 0.03745 | 0.732  |
| 6:30778403 | 0.03766 | 0.8358 |
| 6:32954689 | 0.03772 | 0.7735 |
| 6:30449046 | 0.03776 | 0.7787 |
| 6:31085340 | 0.03784 | 0.848  |
| 6:29822261 | 0.03792 | 0.7311 |
| 6:31097301 | 0.0381  | 0.8547 |
| 6:32411573 | 0.03845 | 0.6544 |
| 6:29775662 | 0.03862 | 0.733  |
| 6:32778281 | 0.03907 | 0.8176 |
| 6:32358144 | 0.03913 | 0.694  |
| 6:32687973 | 0.03913 | 0.6282 |
| 6:31445476 | 0.03919 | 0.5715 |
| 6:31143694 | 0.03928 | 0.8798 |
| 6:32818774 | 0.03941 | 0.8409 |
| 6:32430508 | 0.03957 | 0.7743 |
| 6:31337633 | 0.03958 | 0.5244 |
| 6:32914297 | 0.0396  | 0.7754 |
| 6:32367604 | 0.03968 | 0.7926 |
| 6:31143511 | 0.03969 | 0.8809 |
| 6:31915614 | 0.03973 | 0.6668 |
| 6:32358163 | 0.03973 | 0.6942 |
| 6:31206979 | 0.03976 | 0.8601 |
| 6:30897774 | 0.0398  | 0.88   |
| 6:30196980 | 0.04006 | 0.8314 |
| 6:31106268 | 0.04028 | 0.8743 |
| 6:31272392 | 0.04055 | 1.3432 |
| 6:31445564 | 0.04066 | 0.5723 |
| 6:31340449 | 0.04072 | 1.5133 |
| 6:32380892 | 0.04075 | 0.8453 |
| 6:31356960 | 0.04091 | 0.5087 |
| 6:32723614 | 0.04105 | 0.5893 |
| 6:31371355 | 0.04109 | 1.5156 |
| 6:32817130 | 0.04115 | 0.8415 |
| 6:30823760 | 0.04262 | 0.792  |
| 6:30080231 | 0.04281 | 0.7938 |
| 6:32769575 | 0.04282 | 0.7863 |
| 6:32732890 | 0.04306 | 0.5897 |
| 6:32165444 | 0.04307 | 0.8314 |
| 6:31313556 | 0.04328 | 0.7058 |



|            |         |        |
|------------|---------|--------|
| 6:32782582 | 0.04386 | 0.7784 |
| 6:32219838 | 0.04388 | 0.8285 |
| 6:31176921 | 0.0439  | 0.7762 |
| 6:31522669 | 0.04402 | 0.745  |
| 6:32755087 | 0.04448 | 0.7762 |
| 6:31265940 | 0.04452 | 0.8737 |
| 6:32583405 | 0.04455 | 0.742  |
| 6:31199573 | 0.0447  | 0.8187 |
| 6:32367515 | 0.04525 | 0.7943 |
| 6:32784753 | 0.04576 | 0.7789 |
| 6:31266387 | 0.04618 | 0.8746 |
| 6:32784073 | 0.04635 | 0.7791 |
| 6:31206920 | 0.04647 | 0.864  |
| 6:31266361 | 0.04662 | 0.8749 |
| 6:32755034 | 0.04702 | 0.7785 |
| 6:30446055 | 0.04711 | 0.7765 |
| 6:32582796 | 0.04715 | 0.743  |
| 6:32784620 | 0.04716 | 0.779  |
| 6:30749712 | 0.0474  | 0.8746 |
| 6:31346445 | 0.0475  | 1.3776 |
| 6:31543758 | 0.04752 | 0.6872 |
| 6:32938049 | 0.04811 | 0.7846 |
| 6:30920957 | 0.04825 | 0.8464 |
| 6:32936441 | 0.04842 | 0.7848 |
| 6:31678774 | 0.04861 | 0.6192 |
| 6:31350505 | 0.04862 | 0.4925 |
| 6:32975014 | 0.04868 | 0.8801 |
| 6:31117075 | 0.04896 | 0.8799 |
| 6:30757575 | 0.04915 | 0.8755 |
| 6:31107187 | 0.04924 | 0.7576 |
| 6:32718620 | 0.04946 | 0.559  |
| 6:32345131 | 0.04963 | 0.6977 |
| 6:30388701 | 0.04965 | 1.2708 |
| 6:32362075 | 0.05015 | 0.6978 |
| 6:30993499 | 0.05031 | 1.1274 |
| 6:32776583 | 0.05038 | 0.7881 |
| 6:32367927 | 0.05069 | 0.7952 |
| 6:31082404 | 0.05076 | 0.8814 |
| 6:32852647 | 0.051   | 0.8012 |
| 6:30754540 | 0.05125 | 0.8766 |
| 6:30753146 | 0.05142 | 0.8766 |
| 6:30436681 | 0.05146 | 0.7752 |
| 6:32754781 | 0.05149 | 0.7836 |

|            |         |        |
|------------|---------|--------|
| 6:31497975 | 0.05153 | 0.8212 |
| 6:31465917 | 0.05189 | 0.691  |
| 6:31347643 | 0.05196 | 0.753  |
| 6:32365707 | 0.0522  | 0.797  |
| 6:31506691 | 0.05223 | 0.7869 |
| 6:31665194 | 0.05231 | 0.8129 |
| 6:30756596 | 0.05232 | 0.8771 |
| 6:30758348 | 0.05238 | 0.8771 |
| 6:30755320 | 0.05243 | 0.8772 |
| 6:31172044 | 0.05248 | 0.8365 |
| 6:31346902 | 0.05254 | 0.7218 |
| 6:31635710 | 0.05255 | 0.8569 |
| 6:30756593 | 0.05268 | 0.8773 |
| 6:30755893 | 0.05274 | 0.8773 |
| 6:31346822 | 0.05277 | 0.7218 |
| 6:30755744 | 0.05289 | 0.8774 |
| 6:30755863 | 0.05289 | 0.8774 |
| 6:32365896 | 0.05344 | 0.7961 |
| 6:30756744 | 0.05387 | 0.8778 |
| 6:30756140 | 0.05394 | 0.8779 |
| 6:32366625 | 0.05431 | 0.7963 |
| 6:32853042 | 0.05438 | 0.8036 |
| 6:31336757 | 0.0545  | 0.7637 |
| 6:30752184 | 0.05468 | 0.8782 |
| 6:31437617 | 0.05473 | 0.7552 |
| 6:31437506 | 0.05479 | 0.7553 |
| 6:32900642 | 0.05553 | 0.7992 |
| 6:32429894 | 0.05611 | 0.8234 |
| 6:32765302 | 0.05619 | 0.7895 |
| 6:31002616 | 0.05624 | 0.8155 |
| 6:30756822 | 0.05652 | 0.8789 |
| 6:32752685 | 0.05663 | 0.7887 |
| 6:32783896 | 0.05679 | 0.7789 |
| 6:32777150 | 0.05686 | 0.7895 |
| 6:32777900 | 0.05686 | 0.7895 |
| 6:32586782 | 0.05698 | 0.748  |
| 6:32770808 | 0.05703 | 0.7896 |
| 6:32959160 | 0.05706 | 1.1211 |
| 6:31196295 | 0.05728 | 0.8727 |
| 6:32769204 | 0.05736 | 0.7896 |
| 6:32753654 | 0.0575  | 0.7882 |
| 6:31269701 | 0.05792 | 1.3496 |
| 6:32362182 | 0.05798 | 0.7008 |

|            |         |        |
|------------|---------|--------|
| 6:32358533 | 0.05819 | 0.7005 |
| 6:32265528 | 0.05823 | 0.7812 |
| 6:31043249 | 0.05841 | 0.5712 |
| 6:29730095 | 0.05845 | 0.7783 |
| 6:32361035 | 0.05879 | 0.7007 |
| 6:31317024 | 0.05891 | 0.7342 |
| 6:32362408 | 0.05903 | 0.7007 |
| 6:31318024 | 0.05907 | 0.737  |
| 6:32358459 | 0.05938 | 0.7008 |
| 6:31141523 | 0.05939 | 0.8762 |
| 6:32361613 | 0.0594  | 0.7008 |
| 6:31334945 | 0.05955 | 0.7617 |
| 6:31317382 | 0.05981 | 0.7376 |
| 6:31199208 | 0.0599  | 0.8734 |
| 6:32653070 | 0.0601  | 0.8714 |
| 6:31193155 | 0.06011 | 0.782  |
| 6:31090552 | 0.06076 | 0.8843 |
| 6:32718602 | 0.06091 | 0.5616 |
| 6:31192963 | 0.06116 | 0.7884 |
| 6:32741002 | 0.06164 | 0.7925 |
| 6:29721146 | 0.06169 | 0.773  |
| 6:32709964 | 0.06188 | 0.6307 |
| 6:31080859 | 0.06244 | 0.8099 |
| 6:31262438 | 0.06259 | 0.8835 |
| 6:31192192 | 0.06267 | 0.8644 |
| 6:32743138 | 0.06268 | 0.7932 |
| 6:32754430 | 0.06268 | 0.7932 |
| 6:32754949 | 0.06307 | 0.7935 |
| 6:32752647 | 0.06312 | 0.7935 |
| 6:32752150 | 0.06326 | 0.7936 |
| 6:32752649 | 0.06327 | 0.7937 |
| 6:32756857 | 0.06369 | 0.7939 |
| 6:32748021 | 0.06413 | 0.7942 |
| 6:32751370 | 0.06413 | 0.7942 |
| 6:32751555 | 0.06413 | 0.7942 |
| 6:32752504 | 0.06413 | 0.7942 |
| 6:32752641 | 0.06413 | 0.7942 |
| 6:32754516 | 0.06413 | 0.7942 |
| 6:32755275 | 0.06413 | 0.7942 |
| 6:32758677 | 0.06413 | 0.7942 |
| 6:32752436 | 0.06447 | 0.7945 |
| 6:32447058 | 0.06456 | 0.8251 |
| 6:32650233 | 0.06458 | 0.8736 |

|            |         |        |
|------------|---------|--------|
| 6:32748690 | 0.06521 | 0.795  |
| 6:32911127 | 0.06521 | 0.7995 |
| 6:32581454 | 0.06534 | 0.7457 |
| 6:31273030 | 0.0654  | 1.2186 |
| 6:31008598 | 0.0658  | 0.8683 |
| 6:32915797 | 0.06613 | 0.791  |
| 6:32358368 | 0.06661 | 0.7117 |
| 6:32769926 | 0.06714 | 0.7849 |
| 6:32823567 | 0.06723 | 0.7869 |
| 6:29731635 | 0.06728 | 0.7756 |
| 6:32769663 | 0.06739 | 0.7846 |
| 6:30756361 | 0.06763 | 0.8834 |
| 6:31480272 | 0.06862 | 0.6291 |
| 6:30921364 | 0.06873 | 0.8634 |
| 6:29773158 | 0.06882 | 0.7207 |
| 6:32255417 | 0.06882 | 0.5711 |
| 6:31161229 | 0.06918 | 0.867  |
| 6:32362217 | 0.06936 | 0.7038 |
| 6:31091862 | 0.0694  | 0.8875 |
| 6:32796653 | 0.06999 | 0.7155 |
| 6:32668946 | 0.07001 | 0.8345 |
| 6:32945466 | 0.0701  | 0.7938 |
| 6:32677397 | 0.07012 | 0.6087 |
| 6:31317291 | 0.0704  | 0.7463 |
| 6:32361694 | 0.07047 | 0.7128 |
| 6:32792659 | 0.07068 | 0.8    |
| 6:32279532 | 0.07094 | 0.5719 |
| 6:31112737 | 0.07158 | 0.8739 |
| 6:30904714 | 0.07207 | 0.8547 |
| 6:32361223 | 0.07225 | 0.7133 |
| 6:31610479 | 0.07227 | 0.8626 |
| 6:30823630 | 0.0727  | 0.8548 |
| 6:31266208 | 0.0727  | 0.891  |
| 6:32297209 | 0.07279 | 0.5725 |
| 6:32361566 | 0.07283 | 0.7134 |
| 6:32212985 | 0.07304 | 0.7791 |
| 6:29949821 | 0.07318 | 1.1142 |
| 6:31619576 | 0.07322 | 0.8628 |
| 6:31070664 | 0.07338 | 0.575  |
| 6:31105310 | 0.0734  | 0.8587 |
| 6:30825741 | 0.07345 | 0.8556 |
| 6:31380449 | 0.07401 | 0.8954 |
| 6:31122482 | 0.07407 | 0.8709 |

|            |         |        |
|------------|---------|--------|
| 6:31465030 | 0.07429 | 0.8034 |
| 6:31071645 | 0.07433 | 0.5263 |
| 6:32760318 | 0.07447 | 0.8021 |
| 6:32189032 | 0.07454 | 0.8076 |
| 6:31084435 | 0.07503 | 0.8897 |
| 6:31274555 | 0.07509 | 0.8445 |
| 6:31192796 | 0.07516 | 0.7619 |
| 6:31020152 | 0.07521 | 0.8247 |
| 6:32763405 | 0.07536 | 0.8027 |
| 6:32435123 | 0.07548 | 0.7831 |
| 6:29710726 | 0.07552 | 0.7735 |
| 6:32768721 | 0.07559 | 0.7933 |
| 6:31197293 | 0.0757  | 0.8811 |
| 6:32761690 | 0.07592 | 0.803  |
| 6:30445476 | 0.07596 | 0.799  |
| 6:32361525 | 0.07597 | 0.7143 |
| 6:32592737 | 0.07601 | 1.3024 |
| 6:32816998 | 0.07612 | 0.8629 |
| 6:31192766 | 0.07614 | 0.6762 |
| 6:32761398 | 0.07618 | 0.8031 |
| 6:31121945 | 0.0763  | 0.8716 |
| 6:32361080 | 0.07652 | 0.7145 |
| 6:31130593 | 0.07676 | 0.898  |
| 6:32835258 | 0.07684 | 0.7824 |
| 6:32360955 | 0.07694 | 0.7146 |
| 6:31417456 | 0.07708 | 0.8441 |
| 6:32789480 | 0.07757 | 0.7162 |
| 6:32794676 | 0.07767 | 0.7182 |
| 6:30413907 | 0.07784 | 0.7985 |
| 6:31218038 | 0.07808 | 0.5738 |
| 6:30899571 | 0.0781  | 0.8581 |
| 6:30902181 | 0.07818 | 0.8584 |
| 6:31081052 | 0.07827 | 0.8081 |
| 6:32781776 | 0.07856 | 0.776  |
| 6:31087354 | 0.07862 | 0.8914 |
| 6:30434900 | 0.0787  | 0.7734 |
| 6:32670000 | 0.07879 | 0.6082 |
| 6:31632134 | 0.0792  | 0.8654 |
| 6:31465637 | 0.07928 | 0.7723 |
| 6:30293789 | 0.07955 | 1.2815 |
| 6:33048380 | 0.08038 | 1.1699 |
| 6:29707050 | 0.08076 | 0.7759 |
| 6:31023148 | 0.08149 | 0.8395 |

|            |         |        |
|------------|---------|--------|
| 6:30865204 | 0.08207 | 0.8599 |
| 6:32795965 | 0.08239 | 0.7179 |
| 6:31018546 | 0.08277 | 0.8255 |
| 6:31566204 | 0.08299 | 0.6892 |
| 6:30902009 | 0.08304 | 0.8603 |
| 6:30901926 | 0.0832  | 0.8603 |
| 6:31023186 | 0.08346 | 0.8397 |
| 6:30394628 | 0.08354 | 0.8369 |
| 6:30228138 | 0.08383 | 1.2402 |
| 6:31029918 | 0.08419 | 0.8399 |
| 6:30867958 | 0.08463 | 0.8609 |
| 6:32188603 | 0.08475 | 0.8099 |
| 6:31080586 | 0.08482 | 0.58   |
| 6:31591808 | 0.08552 | 0.8688 |
| 6:31238822 | 0.08558 | 1.356  |
| 6:31601843 | 0.08564 | 0.8683 |
| 6:31038593 | 0.08578 | 0.8377 |
| 6:29983039 | 0.08595 | 1.1088 |
| 6:30434566 | 0.08615 | 0.7754 |
| 6:33041064 | 0.0863  | 1.1679 |
| 6:30231224 | 0.08642 | 0.8567 |
| 6:32913246 | 0.08655 | 0.8166 |
| 6:31346937 | 0.08656 | 0.8703 |
| 6:30849822 | 0.08712 | 0.862  |
| 6:31261276 | 0.08717 | 1.3458 |
| 6:31119422 | 0.08735 | 0.8495 |
| 6:31543101 | 0.08765 | 0.7628 |
| 6:29768344 | 0.08846 | 0.8118 |
| 6:32785515 | 0.08862 | 0.7416 |
| 6:31052684 | 0.08869 | 0.8309 |
| 6:32796521 | 0.0894  | 0.722  |
| 6:32796226 | 0.08971 | 0.72   |
| 6:31261185 | 0.08974 | 1.3446 |
| 6:31261196 | 0.08996 | 1.345  |
| 6:31347566 | 0.08999 | 0.8843 |
| 6:31788479 | 0.09022 | 0.7681 |
| 6:30955738 | 0.09023 | 0.7315 |
| 6:31002013 | 0.09031 | 0.7893 |
| 6:30076755 | 0.0906  | 0.8998 |
| 6:31043232 | 0.09103 | 0.8434 |
| 6:31031381 | 0.09109 | 0.8384 |
| 6:31050244 | 0.09117 | 0.8335 |
| 6:31240884 | 0.09123 | 1.3419 |

|            |         |        |
|------------|---------|--------|
| 6:31044863 | 0.09132 | 0.8314 |
| 6:31016978 | 0.09139 | 0.8273 |
| 6:31028920 | 0.09174 | 0.8409 |
| 6:30774474 | 0.0919  | 0.8621 |
| 6:31271141 | 0.09191 | 1.1938 |
| 6:31272209 | 0.09228 | 1.1927 |
| 6:32928984 | 0.09289 | 0.8278 |
| 6:31272463 | 0.09301 | 1.193  |
| 6:31042608 | 0.09315 | 0.8385 |
| 6:31031696 | 0.09348 | 0.841  |
| 6:31089631 | 0.09351 | 0.8014 |
| 6:31851354 | 0.09355 | 0.7543 |
| 6:31037794 | 0.09382 | 0.841  |
| 6:31883679 | 0.09408 | 0.8159 |
| 6:31274036 | 0.09412 | 1.1923 |
| 6:29789999 | 0.09418 | 1.1839 |
| 6:31036783 | 0.09426 | 0.8411 |
| 6:31039252 | 0.09429 | 0.8411 |
| 6:32787036 | 0.09452 | 0.7589 |
| 6:31273992 | 0.09457 | 1.192  |
| 6:31520426 | 0.09461 | 0.8287 |
| 6:31273578 | 0.09478 | 1.1919 |
| 6:31269154 | 0.09486 | 1.3328 |
| 6:31047471 | 0.09502 | 0.8343 |
| 6:31032358 | 0.09506 | 0.8414 |
| 6:31041493 | 0.09509 | 0.8412 |
| 6:31607111 | 0.0951  | 0.6316 |
| 6:32802807 | 0.0953  | 0.8616 |
| 6:31032937 | 0.09584 | 0.8391 |
| 6:31044468 | 0.09589 | 0.8393 |
| 6:32609789 | 0.09592 | 1.2772 |
| 6:31010200 | 0.09662 | 0.8448 |
| 6:31038976 | 0.09664 | 0.8392 |
| 6:31032387 | 0.09671 | 0.8399 |
| 6:31012356 | 0.09691 | 0.7787 |
| 6:31042811 | 0.09691 | 0.8392 |
| 6:31265262 | 0.09693 | 1.3531 |
| 6:31026434 | 0.09695 | 0.8415 |
| 6:30204526 | 0.09706 | 0.8267 |
| 6:31298515 | 0.09712 | 1.2059 |
| 6:31042306 | 0.09716 | 0.8393 |
| 6:31257625 | 0.09728 | 1.3407 |
| 6:31088922 | 0.09731 | 0.8034 |

|            |         |        |
|------------|---------|--------|
| 6:31260397 | 0.09747 | 1.3412 |
| 6:31259579 | 0.0975  | 1.3412 |
| 6:31259930 | 0.0975  | 1.3412 |
| 6:29834449 | 0.09766 | 1.1175 |
| 6:30246212 | 0.0977  | 1.2663 |
| 6:31272157 | 0.09779 | 1.1902 |
| 6:31346599 | 0.09784 | 0.7949 |
| 6:31254088 | 0.09789 | 1.3421 |
| 6:31600106 | 0.09792 | 0.6653 |
| 6:31804610 | 0.09795 | 0.7679 |
| 6:30976219 | 0.09804 | 0.7352 |
| 6:31086997 | 0.09846 | 0.8036 |
| 6:31087133 | 0.09846 | 0.8036 |
| 6:30293186 | 0.09869 | 1.2621 |
| 6:32782387 | 0.0989  | 0.8173 |
| 6:32029183 | 0.09891 | 0.8232 |
| 6:31050179 | 0.09895 | 0.8348 |
| 6:31253878 | 0.09919 | 1.3416 |
| 6:31053741 | 0.09934 | 0.8314 |
| 6:31605768 | 0.09944 | 0.6256 |
| 6:32740895 | 0.09944 | 0.8063 |
| 6:31016114 | 0.1003  | 0.6908 |
| 6:31014633 | 0.1004  | 0.7805 |
| 6:31048387 | 0.1005  | 0.8351 |
| 6:31240636 | 0.1008  | 1.3285 |
| 6:31332239 | 0.1008  | 0.5831 |
| 6:32987120 | 0.1009  | 1.1051 |
| 6:32796751 | 0.101   | 0.7225 |
| 6:29786487 | 0.1011  | 1.1818 |
| 6:29796640 | 0.1011  | 1.1689 |
| 6:31187075 | 0.1011  | 0.8916 |
| 6:31252925 | 0.1012  | 0.8566 |
| 6:32797361 | 0.1014  | 0.7118 |
| 6:31803130 | 0.1016  | 0.6944 |
| 6:29701564 | 0.1017  | 0.7897 |
| 6:31051854 | 0.1018  | 0.8329 |
| 6:31537606 | 0.1018  | 1.137  |
| 6:32986822 | 0.1018  | 1.1047 |
| 6:31033509 | 0.1019  | 0.84   |
| 6:32987110 | 0.1019  | 1.1047 |
| 6:31489644 | 0.1022  | 0.9011 |
| 6:31388214 | 0.1025  | 0.9041 |
| 6:31047160 | 0.103   | 0.833  |



|            |        |        |
|------------|--------|--------|
| 6:31347057 | 0.1032 | 0.8955 |
| 6:29703262 | 0.1033 | 0.7902 |
| 6:30059616 | 0.1035 | 1.1421 |
| 6:30321189 | 0.1042 | 0.8476 |
| 6:32171075 | 0.1044 | 0.8676 |
| 6:29975453 | 0.1049 | 1.1024 |
| 6:31273366 | 0.1049 | 1.1859 |
| 6:31176226 | 0.105  | 0.8893 |
| 6:32796019 | 0.1052 | 0.7252 |
| 6:30066358 | 0.1054 | 1.1602 |
| 6:31271157 | 0.1061 | 1.1852 |
| 6:31539767 | 0.1061 | 1.1349 |
| 6:29702510 | 0.1062 | 0.7908 |
| 6:29730504 | 0.1063 | 0.9028 |
| 6:31265375 | 0.1065 | 1.2649 |
| 6:32797072 | 0.1065 | 0.7146 |
| 6:29709234 | 0.1074 | 0.787  |
| 6:29705659 | 0.1076 | 0.7911 |
| 6:31505480 | 0.1078 | 0.8517 |
| 6:30137890 | 0.1082 | 1.3477 |
| 6:32759448 | 0.1083 | 0.8052 |
| 6:32816700 | 0.1085 | 0.8668 |
| 6:29789190 | 0.1088 | 1.1809 |
| 6:30025503 | 0.1091 | 0.899  |
| 6:32797109 | 0.1093 | 0.7152 |
| 6:32985835 | 0.1098 | 1.1023 |
| 6:30512505 | 0.1105 | 0.7814 |
| 6:31333716 | 0.1106 | 0.5863 |
| 6:29706277 | 0.1107 | 0.7912 |
| 6:29794049 | 0.1113 | 1.1805 |
| 6:32355511 | 0.1116 | 0.8268 |
| 6:30830292 | 0.1117 | 0.7215 |
| 6:30334994 | 0.1123 | 0.8469 |
| 6:31127037 | 0.1124 | 0.7665 |
| 6:30763562 | 0.1127 | 0.8682 |
| 6:29705688 | 0.1129 | 0.7677 |
| 6:31048263 | 0.1129 | 0.8346 |
| 6:32266506 | 0.1129 | 0.5855 |
| 6:31892641 | 0.1133 | 0.8228 |
| 6:31901773 | 0.1137 | 0.6968 |
| 6:32922908 | 0.114  | 1.1    |
| 6:31804729 | 0.1147 | 0.8083 |
| 6:31679307 | 0.1148 | 0.8004 |

|            |        |        |
|------------|--------|--------|
| 6:31023840 | 0.1151 | 0.7937 |
| 6:32996217 | 0.1154 | 1.1022 |
| 6:30993590 | 0.1155 | 0.8795 |
| 6:32995081 | 0.118  | 1.2583 |
| 6:32345183 | 0.1181 | 0.6407 |
| 6:31266117 | 0.1189 | 1.3232 |
| 6:31272030 | 0.1201 | 0.5646 |
| 6:32176782 | 0.1208 | 0.8694 |
| 6:31273554 | 0.121  | 1.1926 |
| 6:32962420 | 0.1214 | 1.0973 |
| 6:30825220 | 0.1218 | 0.7235 |
| 6:29699156 | 0.1222 | 0.7688 |
| 6:29702679 | 0.1222 | 0.7693 |
| 6:30359293 | 0.1227 | 0.8481 |
| 6:32719666 | 0.1227 | 0.5754 |
| 6:31155670 | 0.1228 | 0.8756 |
| 6:31542476 | 0.1229 | 1.1291 |
| 6:33050036 | 0.123  | 1.1277 |
| 6:30055179 | 0.1231 | 0.7673 |
| 6:32720302 | 0.1232 | 0.5797 |
| 6:31155186 | 0.1233 | 0.8757 |
| 6:32716181 | 0.1233 | 0.5794 |
| 6:30782002 | 0.1236 | 0.8596 |
| 6:30093137 | 0.1237 | 0.8947 |
| 6:32714083 | 0.1237 | 0.5807 |
| 6:33054457 | 0.1241 | 1.1053 |
| 6:32408497 | 0.1245 | 0.8512 |
| 6:31022169 | 0.1246 | 0.7999 |
| 6:32714603 | 0.1246 | 0.5769 |
| 6:32714516 | 0.1248 | 0.576  |
| 6:32715722 | 0.1248 | 0.576  |
| 6:32718452 | 0.1248 | 0.576  |
| 6:32717024 | 0.1249 | 0.5759 |
| 6:31256753 | 0.125  | 0.7411 |
| 6:32722702 | 0.125  | 0.5786 |
| 6:31190303 | 0.1252 | 0.8986 |
| 6:32724499 | 0.1255 | 0.576  |
| 6:30232374 | 0.1263 | 1.2336 |
| 6:31301658 | 0.1269 | 1.1892 |
| 6:31352113 | 0.1273 | 0.5939 |
| 6:32998121 | 0.1273 | 1.1    |
| 6:30296681 | 0.1274 | 1.13   |
| 6:31268183 | 0.1275 | 0.664  |

|            |        |        |
|------------|--------|--------|
| 6:31407579 | 0.1276 | 0.7696 |
| 6:31258846 | 0.1278 | 0.7417 |
| 6:31272892 | 0.1278 | 1.2973 |
| 6:31417396 | 0.1284 | 0.8719 |
| 6:31511350 | 0.1284 | 0.7256 |
| 6:30925985 | 0.1285 | 0.812  |
| 6:30432785 | 0.1292 | 0.8437 |
| 6:31488879 | 0.1301 | 0.7302 |
| 6:31265759 | 0.1308 | 1.2936 |
| 6:32679992 | 0.1308 | 1.2644 |
| 6:31432006 | 0.131  | 0.8252 |
| 6:31154593 | 0.1312 | 0.7906 |
| 6:30208364 | 0.1314 | 1.3143 |
| 6:31232543 | 0.1315 | 0.6301 |
| 6:32715653 | 0.1315 | 0.5771 |
| 6:31254604 | 0.1318 | 1.2929 |
| 6:31077646 | 0.132  | 0.6943 |
| 6:32782605 | 0.1322 | 0.7681 |
| 6:31188654 | 0.1324 | 0.7395 |
| 6:30222020 | 0.1344 | 1.311  |
| 6:30347306 | 0.1344 | 0.8493 |
| 6:29723674 | 0.1346 | 0.9101 |
| 6:31269323 | 0.1347 | 1.2902 |
| 6:31079440 | 0.1351 | 0.798  |
| 6:29963065 | 0.1355 | 1.0938 |
| 6:30208902 | 0.1357 | 1.3098 |
| 6:31005432 | 0.1359 | 0.8264 |
| 6:31308630 | 0.136  | 0.8348 |
| 6:31124491 | 0.1361 | 0.793  |
| 6:31107733 | 0.1366 | 0.8919 |
| 6:31124211 | 0.1368 | 0.7933 |
| 6:31273703 | 0.1368 | 1.2895 |
| 6:30936014 | 0.1372 | 0.8341 |
| 6:32802820 | 0.1374 | 1.0954 |
| 6:32409996 | 0.1376 | 0.7032 |
| 6:31184462 | 0.1382 | 0.9022 |
| 6:30209977 | 0.1389 | 1.3069 |
| 6:30212504 | 0.139  | 1.3076 |
| 6:31113214 | 0.1399 | 0.8927 |
| 6:31930351 | 0.1406 | 0.7844 |
| 6:31917291 | 0.141  | 0.6877 |
| 6:31244520 | 0.1412 | 0.6413 |
| 6:29967302 | 0.1415 | 1.0924 |

|            |        |        |
|------------|--------|--------|
| 6:30872274 | 0.1415 | 0.7254 |
| 6:31118511 | 0.1417 | 0.8931 |
| 6:33003065 | 0.1422 | 0.901  |
| 6:31081205 | 0.1426 | 0.8856 |
| 6:31261514 | 0.1431 | 0.7967 |
| 6:31258096 | 0.1435 | 1.2836 |
| 6:31272321 | 0.1439 | 1.1806 |
| 6:30848253 | 0.1449 | 0.8893 |
| 6:32021130 | 0.1451 | 0.8207 |
| 6:31237354 | 0.1454 | 0.7912 |
| 6:31023203 | 0.1455 | 0.8094 |
| 6:31271070 | 0.1456 | 0.5732 |
| 6:32917544 | 0.1457 | 0.8659 |
| 6:31001143 | 0.1462 | 0.8042 |
| 6:31139131 | 0.1463 | 0.7974 |
| 6:32193678 | 0.1468 | 0.7164 |
| 6:31043230 | 0.147  | 0.8034 |
| 6:31060953 | 0.147  | 0.8033 |
| 6:32654640 | 0.147  | 0.9001 |
| 6:33001488 | 0.148  | 0.9025 |
| 6:32978178 | 0.1491 | 1.1112 |
| 6:31327064 | 0.1494 | 0.7621 |
| 6:31119589 | 0.1498 | 0.9063 |
| 6:31238793 | 0.1498 | 1.2883 |
| 6:31936057 | 0.1498 | 0.8231 |
| 6:30857542 | 0.1499 | 0.891  |
| 6:31182536 | 0.1503 | 0.9052 |
| 6:32787570 | 0.1504 | 0.7253 |
| 6:30858254 | 0.1507 | 0.8912 |
| 6:31147094 | 0.1507 | 0.5263 |
| 6:32743000 | 0.1511 | 0.7796 |
| 6:30855251 | 0.1512 | 0.8913 |
| 6:32988695 | 0.1515 | 1.0957 |
| 6:32744347 | 0.1517 | 0.7797 |
| 6:30825287 | 0.1518 | 0.8426 |
| 6:31815723 | 0.152  | 0.8052 |
| 6:32741918 | 0.1522 | 0.7798 |
| 6:31177034 | 0.1525 | 0.9055 |
| 6:31243170 | 0.1525 | 1.2029 |
| 6:32689529 | 0.1526 | 0.8348 |
| 6:31178943 | 0.1533 | 0.9058 |
| 6:32984231 | 0.1536 | 1.2472 |
| 6:32995863 | 0.1536 | 1.2242 |

|            |        |        |
|------------|--------|--------|
| 6:32788707 | 0.1537 | 0.7248 |
| 6:32019769 | 0.1551 | 0.8256 |
| 6:33006869 | 0.1553 | 0.9042 |
| 6:30362961 | 0.1564 | 1.1262 |
| 6:31255500 | 0.157  | 0.6187 |
| 6:32900787 | 0.1583 | 0.8837 |
| 6:31431691 | 0.1584 | 0.8368 |
| 6:30986040 | 0.1595 | 0.6994 |
| 6:31002101 | 0.1598 | 0.8302 |
| 6:33005208 | 0.1598 | 0.9052 |
| 6:30983348 | 0.1603 | 0.6996 |
| 6:31271630 | 0.1604 | 0.5772 |
| 6:33005273 | 0.1606 | 0.9054 |
| 6:30209836 | 0.1607 | 1.2889 |
| 6:30735105 | 0.161  | 0.8918 |
| 6:32289423 | 0.1612 | 0.7365 |
| 6:30041559 | 0.1613 | 1.0882 |
| 6:31762311 | 0.1617 | 0.7316 |
| 6:31271775 | 0.1619 | 0.5776 |
| 6:30740680 | 0.1621 | 0.8892 |
| 6:31179014 | 0.1621 | 0.9077 |
| 6:32399286 | 0.1623 | 0.7456 |
| 6:32710307 | 0.1623 | 0.4476 |
| 6:31271220 | 0.1628 | 0.8389 |
| 6:29717380 | 0.1631 | 0.8878 |
| 6:29831532 | 0.1631 | 0.7796 |
| 6:31273146 | 0.1635 | 0.8391 |
| 6:32046275 | 0.1637 | 0.8285 |
| 6:30042057 | 0.1641 | 1.1825 |
| 6:30870763 | 0.1642 | 0.8946 |
| 6:30888617 | 0.1648 | 0.6601 |
| 6:31102884 | 0.1652 | 0.9189 |
| 6:31007081 | 0.1658 | 0.7984 |
| 6:31259531 | 0.166  | 0.586  |
| 6:31066671 | 0.1663 | 0.7316 |
| 6:31271601 | 0.1663 | 0.5838 |
| 6:32357274 | 0.1665 | 0.7294 |
| 6:31269382 | 0.167  | 0.8403 |
| 6:31437566 | 0.167  | 0.704  |
| 6:31256050 | 0.1674 | 1.2657 |
| 6:31265565 | 0.1675 | 1.2682 |
| 6:31270951 | 0.1675 | 0.8405 |
| 6:31075161 | 0.1677 | 0.6975 |

|            |        |        |
|------------|--------|--------|
| 6:32862475 | 0.1677 | 1.3053 |
| 6:29714413 | 0.168  | 0.92   |
| 6:32793523 | 0.1681 | 0.7368 |
| 6:31257012 | 0.1685 | 0.5795 |
| 6:31273301 | 0.1688 | 0.5799 |
| 6:32791299 | 0.169  | 0.7336 |
| 6:29726550 | 0.1701 | 1.0859 |
| 6:31448976 | 0.1704 | 0.8738 |
| 6:29829655 | 0.1705 | 0.7829 |
| 6:30899577 | 0.1706 | 0.6615 |
| 6:33050394 | 0.1709 | 1.1133 |
| 6:31736065 | 0.1718 | 0.804  |
| 6:32052983 | 0.1718 | 0.8261 |
| 6:32315486 | 0.1718 | 0.726  |
| 6:29715762 | 0.172  | 0.9207 |
| 6:32584237 | 0.1724 | 0.4275 |
| 6:30871185 | 0.1727 | 0.8967 |
| 6:32689362 | 0.1731 | 0.5102 |
| 6:33053396 | 0.1733 | 1.099  |
| 6:33050325 | 0.1734 | 1.1126 |
| 6:30871000 | 0.1735 | 0.8969 |
| 6:30736402 | 0.1736 | 0.8919 |
| 6:30865115 | 0.1736 | 0.8969 |
| 6:30867666 | 0.1736 | 0.8969 |
| 6:30869593 | 0.1736 | 0.8969 |
| 6:31271226 | 0.1742 | 0.5952 |
| 6:31274693 | 0.1742 | 0.7632 |
| 6:30041509 | 0.1743 | 1.178  |
| 6:31272421 | 0.1752 | 0.5815 |
| 6:30875664 | 0.1757 | 0.8973 |
| 6:31237703 | 0.1758 | 0.9131 |
| 6:29724939 | 0.176  | 0.9213 |
| 6:31271195 | 0.1761 | 0.5818 |
| 6:30899746 | 0.1764 | 0.8922 |
| 6:33054861 | 0.1764 | 1.0983 |
| 6:31264922 | 0.1766 | 0.582  |
| 6:31126232 | 0.1767 | 0.8579 |
| 6:31944851 | 0.1769 | 0.8159 |
| 6:31256561 | 0.1772 | 0.5822 |
| 6:32123639 | 0.1772 | 0.8846 |
| 6:30895990 | 0.1775 | 0.892  |
| 6:30877054 | 0.1776 | 0.8925 |
| 6:31257376 | 0.179  | 0.5827 |

|            |        |        |
|------------|--------|--------|
| 6:31271662 | 0.1791 | 0.5827 |
| 6:32814975 | 0.1792 | 0.8882 |
| 6:30757491 | 0.1793 | 0.8993 |
| 6:30865725 | 0.1794 | 0.8929 |
| 6:30738042 | 0.1795 | 1.3367 |
| 6:31807540 | 0.1803 | 0.8702 |
| 6:31258687 | 0.1804 | 1.25   |
| 6:31255434 | 0.1805 | 0.5832 |
| 6:31935567 | 0.1807 | 0.8025 |
| 6:30444357 | 0.1811 | 1.0879 |
| 6:31272322 | 0.1815 | 0.5834 |
| 6:31272396 | 0.1815 | 0.5834 |
| 6:30875145 | 0.1816 | 0.8987 |
| 6:31272122 | 0.1816 | 0.5837 |
| 6:31273224 | 0.1817 | 0.5835 |
| 6:29725321 | 0.1818 | 0.9222 |
| 6:30713808 | 0.1819 | 0.8897 |
| 6:32434314 | 0.1824 | 1.2349 |
| 6:31273422 | 0.1826 | 0.5834 |
| 6:31273595 | 0.1826 | 0.5837 |
| 6:31068026 | 0.1831 | 0.6918 |
| 6:30769565 | 0.1833 | 0.8938 |
| 6:31272853 | 0.1834 | 0.5832 |
| 6:30861225 | 0.1838 | 0.8938 |
| 6:30979910 | 0.1839 | 0.7239 |
| 6:31272447 | 0.1843 | 0.5842 |
| 6:30792270 | 0.1851 | 0.8912 |
| 6:30877202 | 0.1851 | 0.8995 |
| 6:32814659 | 0.1852 | 0.8896 |
| 6:31379109 | 0.1854 | 0.9139 |
| 6:32687358 | 0.1854 | 0.4711 |
| 6:32688288 | 0.1856 | 0.4713 |
| 6:30875280 | 0.1858 | 0.8996 |
| 6:31264912 | 0.1859 | 0.5847 |
| 6:31273455 | 0.1859 | 0.5847 |
| 6:30878919 | 0.1863 | 0.8997 |
| 6:31093482 | 0.1863 | 0.9179 |
| 6:30875622 | 0.1864 | 0.8998 |
| 6:32862682 | 0.1866 | 0.8588 |
| 6:31255541 | 0.1868 | 0.5853 |
| 6:31256591 | 0.1869 | 0.585  |
| 6:31259854 | 0.1869 | 0.585  |
| 6:30348090 | 0.1871 | 1.117  |

|            |        |        |
|------------|--------|--------|
| 6:30905313 | 0.1877 | 0.9192 |
| 6:32685648 | 0.1879 | 0.4758 |
| 6:32685673 | 0.1879 | 0.4757 |
| 6:31313482 | 0.188  | 0.462  |
| 6:30878769 | 0.1882 | 0.9002 |
| 6:31147194 | 0.1882 | 0.9067 |
| 6:30980582 | 0.1883 | 0.7248 |
| 6:31079894 | 0.1884 | 0.7002 |
| 6:32796480 | 0.1885 | 0.7401 |
| 6:32922459 | 0.1895 | 0.8767 |
| 6:30986527 | 0.1902 | 0.725  |
| 6:31335566 | 0.1905 | 0.9041 |
| 6:31382690 | 0.1907 | 0.9149 |
| 6:32688779 | 0.1907 | 0.4731 |
| 6:31080899 | 0.1911 | 0.7138 |
| 6:30327753 | 0.1915 | 1.1163 |
| 6:32804219 | 0.1917 | 1.0861 |
| 6:30859520 | 0.1921 | 0.8957 |
| 6:31868938 | 0.1921 | 0.5816 |
| 6:32977535 | 0.1925 | 1.1127 |
| 6:30792235 | 0.1927 | 0.8932 |
| 6:30362995 | 0.1936 | 1.1138 |
| 6:31234150 | 0.1938 | 0.8169 |
| 6:33051683 | 0.1938 | 1.0895 |
| 6:30397089 | 0.194  | 0.8316 |
| 6:31259137 | 0.194  | 0.5698 |
| 6:31080432 | 0.1941 | 0.7106 |
| 6:31273562 | 0.1943 | 0.5669 |
| 6:30790481 | 0.1944 | 0.8937 |
| 6:31081635 | 0.1948 | 0.8715 |
| 6:32684468 | 0.1948 | 0.5792 |
| 6:30734080 | 0.195  | 0.9077 |
| 6:32803840 | 0.1955 | 1.082  |
| 6:32704523 | 0.1957 | 0.4742 |
| 6:32707360 | 0.1963 | 0.4744 |
| 6:29716901 | 0.1965 | 0.9248 |
| 6:30331027 | 0.1966 | 1.1145 |
| 6:30990490 | 0.1966 | 0.7431 |
| 6:32400344 | 0.1966 | 0.8761 |
| 6:32705110 | 0.197  | 0.4781 |
| 6:32402705 | 0.1971 | 0.8762 |
| 6:32707783 | 0.1973 | 0.4747 |
| 6:30769687 | 0.1975 | 0.8969 |



|            |        |        |
|------------|--------|--------|
| 6:32709738 | 0.1977 | 0.4749 |
| 6:32704900 | 0.1982 | 0.475  |
| 6:30979824 | 0.1984 | 0.727  |
| 6:30397840 | 0.1985 | 0.8324 |
| 6:30068195 | 0.1986 | 0.8452 |
| 6:32975381 | 0.1992 | 1.0954 |
| 6:30790759 | 0.1993 | 0.8945 |
| 6:32980031 | 0.1996 | 1.2307 |
| 6:31379377 | 0.1998 | 0.9166 |
| 6:32989477 | 0.1998 | 1.2219 |
| 6:30319930 | 0.1999 | 0.8481 |
| 6:31127562 | 0.2    | 0.9095 |
| 6:31232125 | 0.2    | 0.8193 |
| 6:30790807 | 0.2001 | 0.8947 |
| 6:31009055 | 0.2001 | 0.8874 |
| 6:32743103 | 0.2001 | 0.654  |
| 6:30981715 | 0.2003 | 0.7271 |
| 6:29945620 | 0.2004 | 1.1416 |
| 6:30035485 | 0.2004 | 0.805  |
| 6:30932068 | 0.201  | 0.892  |
| 6:30874165 | 0.2011 | 0.9029 |
| 6:31340611 | 0.2011 | 0.9078 |
| 6:33053307 | 0.2012 | 1.0872 |
| 6:33051139 | 0.2013 | 1.0872 |
| 6:30569489 | 0.2015 | 1.1082 |
| 6:30411089 | 0.2018 | 0.8325 |
| 6:32692780 | 0.2021 | 0.4839 |
| 6:31336100 | 0.2023 | 0.9119 |
| 6:32804217 | 0.2023 | 1.084  |
| 6:30731633 | 0.2024 | 0.9092 |
| 6:31245911 | 0.2024 | 0.8209 |
| 6:32690157 | 0.2024 | 0.484  |
| 6:32992077 | 0.2024 | 1.1714 |
| 6:30115204 | 0.2026 | 0.8711 |
| 6:32698026 | 0.2026 | 0.4841 |
| 6:33052803 | 0.2026 | 1.0867 |
| 6:30792867 | 0.2027 | 0.8956 |
| 6:31240988 | 0.2029 | 0.5889 |
| 6:30730960 | 0.2032 | 0.9093 |
| 6:30986396 | 0.2032 | 0.7277 |
| 6:31340630 | 0.2035 | 0.9082 |
| 6:30698541 | 0.2039 | 0.8993 |
| 6:30986079 | 0.2039 | 0.7278 |

|            |        |        |
|------------|--------|--------|
| 6:30986264 | 0.2039 | 0.7278 |
| 6:30983296 | 0.204  | 0.7264 |
| 6:30987327 | 0.2041 | 0.7278 |
| 6:32798795 | 0.2041 | 1.0809 |
| 6:30989770 | 0.2042 | 0.7278 |
| 6:31241737 | 0.2045 | 0.5897 |
| 6:30788195 | 0.2046 | 0.896  |
| 6:33050877 | 0.2047 | 1.0865 |
| 6:33051051 | 0.2048 | 1.0865 |
| 6:33053682 | 0.2051 | 1.0863 |
| 6:33053942 | 0.2052 | 1.092  |
| 6:30064702 | 0.2057 | 0.8466 |
| 6:30792364 | 0.2057 | 0.8962 |
| 6:33052768 | 0.2064 | 1.086  |
| 6:33052986 | 0.2064 | 1.086  |
| 6:33053723 | 0.2064 | 1.086  |
| 6:30986705 | 0.2066 | 0.7283 |
| 6:32345283 | 0.207  | 0.682  |
| 6:30791561 | 0.2071 | 0.8965 |
| 6:30986491 | 0.2073 | 0.7284 |
| 6:32685685 | 0.2073 | 0.4839 |
| 6:32577380 | 0.2076 | 0.9083 |
| 6:33053248 | 0.2079 | 1.0857 |
| 6:33054807 | 0.2079 | 1.0857 |
| 6:30423223 | 0.2081 | 0.8333 |
| 6:33053399 | 0.2081 | 1.0857 |
| 6:31675501 | 0.2086 | 0.8302 |
| 6:30409037 | 0.209  | 0.8334 |
| 6:30573842 | 0.209  | 1.1066 |
| 6:30986504 | 0.2092 | 0.7288 |
| 6:30406756 | 0.2098 | 0.8336 |
| 6:31448862 | 0.2098 | 0.8627 |
| 6:30412504 | 0.2101 | 0.8336 |
| 6:30414919 | 0.2101 | 0.8336 |
| 6:30417704 | 0.2102 | 0.8382 |
| 6:30987786 | 0.2104 | 0.8482 |
| 6:30425455 | 0.2107 | 0.8337 |
| 6:30410153 | 0.211  | 0.8337 |
| 6:30690938 | 0.2111 | 0.8228 |
| 6:30413494 | 0.2112 | 0.8337 |
| 6:30414235 | 0.2112 | 0.8337 |
| 6:30418583 | 0.2112 | 0.8337 |
| 6:30773314 | 0.2113 | 0.8974 |

|            |        |        |
|------------|--------|--------|
| 6:32950382 | 0.2114 | 0.7739 |
| 6:32398525 | 0.2116 | 0.8801 |
| 6:30034184 | 0.212  | 0.8095 |
| 6:30426078 | 0.2123 | 0.8339 |
| 6:30428227 | 0.2123 | 0.8342 |
| 6:30427510 | 0.2124 | 0.8339 |
| 6:30423358 | 0.2127 | 0.8339 |
| 6:30424676 | 0.2127 | 0.8339 |
| 6:31409102 | 0.2128 | 0.919  |
| 6:31753526 | 0.2128 | 0.8161 |
| 6:30419926 | 0.2129 | 0.8377 |
| 6:30424074 | 0.2129 | 0.8331 |
| 6:30423187 | 0.213  | 0.8339 |
| 6:30410824 | 0.2138 | 0.834  |
| 6:30419859 | 0.2141 | 0.8341 |
| 6:32581973 | 0.2143 | 0.9099 |
| 6:32397813 | 0.2146 | 0.8809 |
| 6:31244532 | 0.2147 | 0.8261 |
| 6:32057627 | 0.2149 | 0.8378 |
| 6:33034815 | 0.2167 | 0.8865 |
| 6:30773239 | 0.2171 | 0.8988 |
| 6:31453781 | 0.2173 | 0.7366 |
| 6:32989468 | 0.2175 | 1.2126 |
| 6:32990811 | 0.2175 | 1.2126 |
| 6:30955613 | 0.2178 | 0.8164 |
| 6:32990675 | 0.218  | 1.2123 |
| 6:32981682 | 0.2185 | 1.0779 |
| 6:32986447 | 0.2186 | 1.2457 |
| 6:32072211 | 0.2187 | 0.7312 |
| 6:31171924 | 0.2197 | 0.7354 |
| 6:31206206 | 0.2198 | 0.9278 |
| 6:32657916 | 0.2199 | 1.2097 |
| 6:30423577 | 0.2203 | 0.8351 |
| 6:30987176 | 0.2203 | 0.8495 |
| 6:31269308 | 0.2203 | 0.6278 |
| 6:31749142 | 0.2203 | 0.881  |
| 6:30423370 | 0.2204 | 0.8349 |
| 6:30423279 | 0.2206 | 0.8349 |
| 6:30420907 | 0.2207 | 0.8348 |
| 6:30766244 | 0.2208 | 0.8965 |
| 6:30385618 | 0.221  | 0.8214 |
| 6:31344670 | 0.2214 | 0.921  |
| 6:33051640 | 0.2218 | 1.084  |

|            |        |        |
|------------|--------|--------|
| 6:32675470 | 0.2222 | 1.2084 |
| 6:31730568 | 0.2229 | 0.8462 |
| 6:32802203 | 0.2232 | 1.0775 |
| 6:30419258 | 0.2236 | 0.8274 |
| 6:31173768 | 0.2244 | 0.7363 |
| 6:32989281 | 0.2274 | 1.0805 |
| 6:31512799 | 0.2278 | 0.8632 |
| 6:30924024 | 0.228  | 0.9203 |
| 6:32799157 | 0.2285 | 0.7543 |
| 6:33054890 | 0.2285 | 1.0818 |
| 6:32659582 | 0.2298 | 1.2047 |
| 6:30350660 | 0.2309 | 1.1041 |
| 6:31080704 | 0.2327 | 0.7795 |
| 6:32936373 | 0.2335 | 0.8874 |
| 6:30330341 | 0.2336 | 1.1057 |
| 6:32955029 | 0.234  | 0.7711 |
| 6:31343632 | 0.2359 | 0.913  |
| 6:30873886 | 0.2374 | 0.9097 |
| 6:32963354 | 0.2376 | 0.7727 |
| 6:30391723 | 0.2378 | 0.8375 |
| 6:31058340 | 0.2382 | 0.8906 |
| 6:30987098 | 0.239  | 0.8518 |
| 6:31129310 | 0.239  | 0.8912 |
| 6:30392248 | 0.2394 | 0.8377 |
| 6:31507447 | 0.2396 | 0.8664 |
| 6:30984404 | 0.2398 | 0.8934 |
| 6:31336568 | 0.24   | 0.9138 |
| 6:31264598 | 0.2402 | 0.899  |
| 6:31336418 | 0.2409 | 0.914  |
| 6:29695713 | 0.241  | 0.8077 |
| 6:30657043 | 0.2411 | 0.8231 |
| 6:30386027 | 0.2415 | 0.8249 |
| 6:30987211 | 0.2418 | 0.8813 |
| 6:31384792 | 0.2418 | 0.9209 |
| 6:30379965 | 0.2422 | 0.8587 |
| 6:30392406 | 0.2422 | 0.838  |
| 6:30384317 | 0.243  | 0.8242 |
| 6:31264246 | 0.2436 | 0.8996 |
| 6:30378601 | 0.2439 | 0.8249 |
| 6:30394951 | 0.2441 | 0.8367 |
| 6:32950961 | 0.2441 | 0.7758 |
| 6:30377705 | 0.2447 | 0.825  |
| 6:31265314 | 0.2448 | 0.8055 |

|            |        |        |
|------------|--------|--------|
| 6:30385466 | 0.245  | 0.8326 |
| 6:31511705 | 0.2455 | 0.8679 |
| 6:30392160 | 0.2456 | 0.8384 |
| 6:30383675 | 0.2457 | 0.8253 |
| 6:30334339 | 0.2461 | 1.1031 |
| 6:30921882 | 0.2469 | 0.9233 |
| 6:32941214 | 0.2469 | 0.8904 |
| 6:31407643 | 0.2471 | 0.9257 |
| 6:30038647 | 0.2476 | 0.8826 |
| 6:31388601 | 0.248  | 1.1441 |
| 6:32715160 | 0.2487 | 0.4961 |
| 6:31117695 | 0.2488 | 0.8766 |
| 6:31440082 | 0.2492 | 0.9261 |
| 6:30723781 | 0.2495 | 0.89   |
| 6:32431558 | 0.2504 | 0.8353 |
| 6:30986835 | 0.2506 | 0.8822 |
| 6:31601735 | 0.2507 | 0.837  |
| 6:32961104 | 0.2509 | 0.9156 |
| 6:31593265 | 0.252  | 0.8375 |
| 6:31389839 | 0.2525 | 1.1427 |
| 6:32981647 | 0.2542 | 1.0723 |
| 6:32743298 | 0.2543 | 0.8199 |
| 6:29938025 | 0.2547 | 1.202  |
| 6:30979933 | 0.2547 | 0.8971 |
| 6:33048694 | 0.2552 | 1.0772 |
| 6:31390055 | 0.2561 | 0.9234 |
| 6:32975511 | 0.2563 | 1.1416 |
| 6:30429033 | 0.2571 | 0.8522 |
| 6:31389809 | 0.2571 | 0.9235 |
| 6:32854697 | 0.2592 | 0.8943 |
| 6:30362999 | 0.26   | 1.1449 |
| 6:32688539 | 0.2602 | 0.4886 |
| 6:30680916 | 0.2609 | 1.095  |
| 6:32980606 | 0.262  | 1.071  |
| 6:32979609 | 0.2623 | 1.071  |
| 6:32790059 | 0.2635 | 0.7035 |
| 6:33052250 | 0.2642 | 1.0761 |
| 6:30011451 | 0.2661 | 0.853  |
| 6:32979746 | 0.2663 | 1.0703 |
| 6:30046376 | 0.2669 | 1.1228 |
| 6:30979793 | 0.2671 | 0.8989 |
| 6:31263216 | 0.2683 | 0.9047 |
| 6:32354803 | 0.2689 | 0.5996 |

|            |        |        |
|------------|--------|--------|
| 6:30333505 | 0.2699 | 0.8924 |
| 6:30966282 | 0.2701 | 0.749  |
| 6:30983683 | 0.2701 | 0.8994 |
| 6:31433558 | 0.2701 | 1.09   |
| 6:30032522 | 0.2703 | 0.8877 |
| 6:30058988 | 0.2721 | 1.0968 |
| 6:32986573 | 0.2725 | 1.0721 |
| 6:31513559 | 0.2728 | 1.09   |
| 6:30964393 | 0.2729 | 0.7508 |
| 6:30966304 | 0.273  | 0.7496 |
| 6:33050654 | 0.2732 | 1.0749 |
| 6:30986664 | 0.2742 | 0.9004 |
| 6:32984255 | 0.2743 | 1.0719 |
| 6:32854052 | 0.2747 | 0.8965 |
| 6:33050024 | 0.2751 | 1.0747 |
| 6:31327435 | 0.2756 | 0.8099 |
| 6:32950511 | 0.2757 | 0.8859 |
| 6:31131707 | 0.277  | 1.4734 |
| 6:30987010 | 0.2776 | 0.901  |
| 6:31111174 | 0.278  | 1.473  |
| 6:32750915 | 0.2782 | 0.7644 |
| 6:30970970 | 0.2791 | 0.8187 |
| 6:30940945 | 0.2795 | 0.7532 |
| 6:32862740 | 0.2795 | 0.8643 |
| 6:31036706 | 0.2797 | 0.8635 |
| 6:32855458 | 0.2797 | 0.8948 |
| 6:30940302 | 0.2798 | 0.7532 |
| 6:32741844 | 0.2806 | 0.7611 |
| 6:30967202 | 0.281  | 0.7512 |
| 6:33053271 | 0.2811 | 1.0732 |
| 6:30896147 | 0.2812 | 0.9151 |
| 6:30960267 | 0.2812 | 0.7517 |
| 6:30941691 | 0.2814 | 0.7535 |
| 6:30946148 | 0.2814 | 0.7531 |
| 6:33050742 | 0.2816 | 1.0736 |
| 6:33050473 | 0.2819 | 1.0735 |
| 6:31440497 | 0.282  | 0.931  |
| 6:30958494 | 0.2822 | 0.7506 |
| 6:30941645 | 0.2823 | 0.7537 |
| 6:30942929 | 0.2825 | 0.7538 |
| 6:30793667 | 0.2827 | 0.9073 |
| 6:30943083 | 0.2828 | 0.7538 |
| 6:30940705 | 0.283  | 0.7539 |

|            |        |        |
|------------|--------|--------|
| 6:30941285 | 0.283  | 0.7539 |
| 6:31330619 | 0.2831 | 0.9212 |
| 6:30947365 | 0.2835 | 0.7535 |
| 6:32321597 | 0.2837 | 0.4962 |
| 6:30697740 | 0.2838 | 0.8429 |
| 6:30716719 | 0.2839 | 0.8456 |
| 6:30599702 | 0.284  | 1.0907 |
| 6:31378510 | 0.2848 | 1.1336 |
| 6:31141127 | 0.2854 | 1.3906 |
| 6:30978717 | 0.2855 | 0.8581 |
| 6:32924061 | 0.2859 | 0.8883 |
| 6:31275174 | 0.2866 | 0.8122 |
| 6:30887972 | 0.2868 | 0.9164 |
| 6:32905086 | 0.2869 | 0.6412 |
| 6:31107031 | 0.2872 | 1.4676 |
| 6:31112354 | 0.2872 | 1.4676 |
| 6:31262869 | 0.2881 | 1.1838 |
| 6:30942387 | 0.2884 | 0.7549 |
| 6:33050045 | 0.2884 | 1.0726 |
| 6:32855275 | 0.2889 | 0.8966 |
| 6:32855366 | 0.2889 | 0.8967 |
| 6:30026236 | 0.2891 | 0.8755 |
| 6:31106516 | 0.2895 | 1.4609 |
| 6:30972202 | 0.2902 | 0.7519 |
| 6:30976781 | 0.2903 | 0.7525 |
| 6:31275163 | 0.2904 | 0.8128 |
| 6:31408265 | 0.2904 | 0.7377 |
| 6:30978196 | 0.2907 | 0.7524 |
| 6:30895680 | 0.2908 | 0.917  |
| 6:30792492 | 0.291  | 0.9088 |
| 6:30956779 | 0.2914 | 0.7524 |
| 6:32855683 | 0.2918 | 0.8973 |
| 6:30034289 | 0.2923 | 0.8758 |
| 6:30975445 | 0.2924 | 0.7526 |
| 6:30975090 | 0.2927 | 0.7527 |
| 6:30943539 | 0.2928 | 0.7557 |
| 6:30974995 | 0.2941 | 0.7529 |
| 6:30975224 | 0.2941 | 0.7529 |
| 6:30975440 | 0.2941 | 0.7529 |
| 6:30972471 | 0.2942 | 0.7531 |
| 6:30389323 | 0.2946 | 0.8447 |
| 6:30281578 | 0.2951 | 0.8561 |
| 6:32855624 | 0.2956 | 0.898  |

|            |        |        |
|------------|--------|--------|
| 6:32856482 | 0.2956 | 0.898  |
| 6:30950589 | 0.2958 | 0.7546 |
| 6:30271792 | 0.2962 | 0.8565 |
| 6:30955929 | 0.2965 | 0.7545 |
| 6:30956215 | 0.2966 | 0.7534 |
| 6:30791533 | 0.2967 | 0.9098 |
| 6:32855347 | 0.2967 | 0.8982 |
| 6:30789665 | 0.298  | 0.91   |
| 6:30948421 | 0.2992 | 0.7393 |
| 6:30949430 | 0.2993 | 0.7425 |
| 6:30940032 | 0.3001 | 0.7531 |
| 6:33050279 | 0.301  | 1.0705 |
| 6:31511857 | 0.3011 | 1.0849 |
| 6:30786339 | 0.3014 | 0.9106 |
| 6:31440309 | 0.3015 | 0.9338 |
| 6:29723161 | 0.3018 | 1.2286 |
| 6:30279130 | 0.3019 | 0.8962 |
| 6:30795328 | 0.3023 | 0.9108 |
| 6:32982921 | 0.3036 | 1.065  |
| 6:31438794 | 0.304  | 0.8805 |
| 6:30778305 | 0.3045 | 0.9112 |
| 6:30344645 | 0.3048 | 0.9015 |
| 6:31673436 | 0.3051 | 0.8409 |
| 6:30767049 | 0.3061 | 0.9115 |
| 6:32765585 | 0.3076 | 0.8979 |
| 6:30794644 | 0.3078 | 0.9121 |
| 6:32741868 | 0.3087 | 0.8348 |
| 6:32982911 | 0.3089 | 1.0643 |
| 6:29940372 | 0.3102 | 1.0985 |
| 6:30046682 | 0.3106 | 1.112  |
| 6:30761734 | 0.3107 | 0.9281 |
| 6:33050107 | 0.3112 | 1.0698 |
| 6:31020933 | 0.3118 | 0.9176 |
| 6:32860752 | 0.3125 | 0.9008 |
| 6:30781904 | 0.3131 | 0.9128 |
| 6:29713926 | 0.3134 | 0.8907 |
| 6:29753868 | 0.3143 | 0.8672 |
| 6:31512936 | 0.3145 | 0.7707 |
| 6:31424607 | 0.3147 | 0.9051 |
| 6:30776621 | 0.3149 | 0.9134 |
| 6:29773509 | 0.3161 | 0.9368 |
| 6:29743563 | 0.3172 | 0.937  |
| 6:30185244 | 0.3188 | 0.8767 |



|            |        |        |
|------------|--------|--------|
| 6:30777321 | 0.3191 | 0.914  |
| 6:30781151 | 0.3209 | 0.9143 |
| 6:31413000 | 0.321  | 0.6148 |
| 6:30763893 | 0.3217 | 0.9202 |
| 6:30780936 | 0.322  | 0.9145 |
| 6:31347816 | 0.3229 | 0.9369 |
| 6:31272818 | 0.323  | 0.7749 |
| 6:29718165 | 0.3232 | 0.8895 |
| 6:29830591 | 0.3252 | 1.1469 |
| 6:29713036 | 0.3257 | 1.2332 |
| 6:32984011 | 0.3258 | 1.062  |
| 6:30171922 | 0.3262 | 0.8758 |
| 6:31699573 | 0.3269 | 0.8285 |
| 6:31141954 | 0.3271 | 0.8952 |
| 6:31408004 | 0.3277 | 0.6164 |
| 6:33049979 | 0.3279 | 1.0669 |
| 6:31081434 | 0.3281 | 0.9094 |
| 6:30977205 | 0.3285 | 0.7599 |
| 6:32857966 | 0.3285 | 0.9039 |
| 6:31269348 | 0.3291 | 0.763  |
| 6:32858780 | 0.3296 | 0.9042 |
| 6:29712704 | 0.3298 | 1.2323 |
| 6:30181638 | 0.3301 | 1.1334 |
| 6:30209953 | 0.3302 | 1.1334 |
| 6:31141671 | 0.3313 | 0.8961 |
| 6:30172233 | 0.3327 | 1.1324 |
| 6:32985413 | 0.3332 | 1.061  |
| 6:32859712 | 0.3347 | 0.9051 |
| 6:31475763 | 0.3349 | 1.2361 |
| 6:30151370 | 0.3355 | 1.1318 |
| 6:32813852 | 0.3367 | 0.8757 |
| 6:31411406 | 0.3376 | 0.6189 |
| 6:32807490 | 0.3379 | 0.8944 |
| 6:31263751 | 0.3383 | 0.926  |
| 6:32813864 | 0.3388 | 0.8762 |
| 6:32813756 | 0.3409 | 0.8767 |
| 6:29927095 | 0.3412 | 1.0758 |
| 6:30193874 | 0.3413 | 1.1301 |
| 6:32109938 | 0.3416 | 0.9128 |
| 6:32755290 | 0.3426 | 0.9051 |
| 6:31264302 | 0.3437 | 0.927  |
| 6:31351887 | 0.3439 | 0.9398 |
| 6:32993266 | 0.3443 | 1.0618 |

|            |        |        |
|------------|--------|--------|
| 6:31388522 | 0.3462 | 0.7427 |
| 6:32986677 | 0.3462 | 1.0593 |
| 6:29711747 | 0.3467 | 0.8885 |
| 6:31920873 | 0.3483 | 0.762  |
| 6:32983714 | 0.3495 | 1.0589 |
| 6:31034110 | 0.3514 | 0.8812 |
| 6:32970450 | 0.3514 | 1.0591 |
| 6:31639979 | 0.3518 | 0.8399 |
| 6:31243884 | 0.3523 | 0.9341 |
| 6:30953105 | 0.3532 | 0.9183 |
| 6:32816972 | 0.3541 | 0.8798 |
| 6:30710135 | 0.3544 | 0.6738 |
| 6:30700695 | 0.3545 | 0.6739 |
| 6:31377047 | 0.3547 | 0.9003 |
| 6:29835654 | 0.3573 | 0.8897 |
| 6:30700558 | 0.3574 | 0.6745 |
| 6:30708428 | 0.3603 | 0.6751 |
| 6:30709364 | 0.3603 | 0.6751 |
| 6:30709830 | 0.3603 | 0.6751 |
| 6:32989971 | 0.3604 | 1.0598 |
| 6:31111356 | 0.3617 | 0.7321 |
| 6:31379115 | 0.3633 | 0.9375 |
| 6:31269173 | 0.3657 | 0.9456 |
| 6:30938883 | 0.367  | 0.9177 |
| 6:33049983 | 0.37   | 1.0612 |
| 6:31410948 | 0.3715 | 0.9407 |
| 6:29849619 | 0.3751 | 0.9198 |
| 6:30048020 | 0.3756 | 0.8649 |
| 6:29808814 | 0.3768 | 1.212  |
| 6:30333380 | 0.3769 | 1.1141 |
| 6:29833948 | 0.3781 | 0.9206 |
| 6:30947042 | 0.3806 | 0.9194 |
| 6:31024808 | 0.384  | 0.892  |
| 6:29701476 | 0.3845 | 1.2004 |
| 6:31342960 | 0.3846 | 0.9381 |
| 6:31169933 | 0.3851 | 0.9186 |
| 6:32911418 | 0.386  | 0.8276 |
| 6:30169327 | 0.3886 | 0.9341 |
| 6:32369488 | 0.3894 | 0.8843 |
| 6:31546980 | 0.3905 | 1.1743 |
| 6:32916699 | 0.3911 | 0.9375 |
| 6:30339245 | 0.3912 | 1.1107 |
| 6:31111400 | 0.3912 | 0.8703 |

|            |        |        |
|------------|--------|--------|
| 6:31263587 | 0.3917 | 0.934  |
| 6:31091328 | 0.3955 | 1.2888 |
| 6:30498864 | 0.3988 | 1.0726 |
| 6:32820043 | 0.3989 | 0.862  |
| 6:31373810 | 0.3994 | 0.8239 |
| 6:31368588 | 0.4003 | 0.8252 |
| 6:31344098 | 0.403  | 0.8242 |
| 6:32636443 | 0.404  | 0.9369 |
| 6:32767620 | 0.4047 | 0.9355 |
| 6:29746367 | 0.4048 | 0.9473 |
| 6:30532278 | 0.4056 | 1.0707 |
| 6:32430368 | 0.4066 | 0.8965 |
| 6:31347877 | 0.4068 | 0.8246 |
| 6:30714479 | 0.4076 | 0.9491 |
| 6:31024601 | 0.4076 | 0.8971 |
| 6:30441652 | 0.4085 | 1.0718 |
| 6:30172513 | 0.4098 | 0.9373 |
| 6:31383848 | 0.4101 | 0.9262 |
| 6:31336628 | 0.4108 | 0.8237 |
| 6:30907266 | 0.414  | 1.0782 |
| 6:31345535 | 0.4143 | 0.8255 |
| 6:31360389 | 0.4164 | 0.8269 |
| 6:31506801 | 0.4175 | 1.0649 |
| 6:31352040 | 0.4178 | 0.9468 |
| 6:31363489 | 0.4178 | 0.8294 |
| 6:32901934 | 0.4183 | 0.9289 |
| 6:32935361 | 0.4198 | 0.8156 |
| 6:31615167 | 0.4204 | 0.8173 |
| 6:29812559 | 0.4205 | 1.2356 |
| 6:31352328 | 0.421  | 0.8263 |
| 6:29933261 | 0.4215 | 0.8985 |
| 6:30065117 | 0.422  | 0.8642 |
| 6:31122330 | 0.4232 | 0.7586 |
| 6:31354344 | 0.4232 | 0.8265 |
| 6:29987122 | 0.4236 | 0.8763 |
| 6:30650318 | 0.4261 | 0.8952 |
| 6:32935509 | 0.4262 | 0.8146 |
| 6:29757995 | 0.4264 | 0.9486 |
| 6:30516458 | 0.4266 | 1.0674 |
| 6:32813768 | 0.4271 | 0.9118 |
| 6:32932987 | 0.4277 | 0.8166 |
| 6:32935751 | 0.4277 | 0.8166 |
| 6:32951161 | 0.4277 | 0.8166 |

|            |        |        |
|------------|--------|--------|
| 6:30068472 | 0.428  | 0.8658 |
| 6:32934983 | 0.4287 | 0.8167 |
| 6:32635974 | 0.4291 | 0.9401 |
| 6:30128949 | 0.4294 | 0.9154 |
| 6:30127805 | 0.4297 | 0.9151 |
| 6:31342801 | 0.4298 | 0.9438 |
| 6:30063496 | 0.4301 | 1.0615 |
| 6:29925086 | 0.4319 | 0.9049 |
| 6:31352830 | 0.4331 | 0.8266 |
| 6:32893102 | 0.4337 | 0.9158 |
| 6:30062257 | 0.4343 | 0.8675 |
| 6:32978587 | 0.4344 | 0.9095 |
| 6:31342827 | 0.4346 | 0.9443 |
| 6:31344571 | 0.435  | 0.8269 |
| 6:31496915 | 0.4362 | 1.0625 |
| 6:31327371 | 0.4384 | 0.9018 |
| 6:31334174 | 0.4384 | 0.8326 |
| 6:31640227 | 0.4403 | 0.8547 |
| 6:31364105 | 0.4409 | 0.8289 |
| 6:30728360 | 0.4414 | 0.9452 |
| 6:31352748 | 0.4416 | 0.8277 |
| 6:32989244 | 0.4444 | 1.0481 |
| 6:29926128 | 0.4449 | 0.9082 |
| 6:32945625 | 0.4451 | 0.82   |
| 6:31252747 | 0.4456 | 1.1286 |
| 6:31335507 | 0.4456 | 0.8282 |
| 6:29830411 | 0.4462 | 1.0659 |
| 6:29827390 | 0.4463 | 1.0659 |
| 6:31258868 | 0.4468 | 1.1302 |
| 6:29831052 | 0.4475 | 1.0657 |
| 6:30726939 | 0.4481 | 0.9361 |
| 6:31434198 | 0.4482 | 1.0615 |
| 6:31176928 | 0.4487 | 0.9285 |
| 6:29913099 | 0.449  | 0.8591 |
| 6:31252667 | 0.449  | 1.1329 |
| 6:30056985 | 0.4496 | 0.8901 |
| 6:30057544 | 0.4499 | 0.8717 |
| 6:30154049 | 0.4504 | 0.8972 |
| 6:29821293 | 0.4506 | 0.9226 |
| 6:32814902 | 0.4526 | 0.8761 |
| 6:31170514 | 0.4528 | 0.9286 |
| 6:32804070 | 0.4537 | 0.6268 |
| 6:29831372 | 0.4538 | 1.0654 |

|            |        |        |
|------------|--------|--------|
| 6:32815930 | 0.4539 | 0.8764 |
| 6:32901351 | 0.4541 | 0.934  |
| 6:31259902 | 0.4554 | 1.1293 |
| 6:31410408 | 0.4556 | 0.9276 |
| 6:32820137 | 0.4559 | 0.8769 |
| 6:30046939 | 0.4561 | 0.8853 |
| 6:31434111 | 0.4562 | 1.0618 |
| 6:32819968 | 0.4562 | 0.877  |
| 6:32818031 | 0.4567 | 0.8771 |
| 6:31352459 | 0.4573 | 0.8393 |
| 6:30171827 | 0.4581 | 0.9434 |
| 6:31173096 | 0.4594 | 0.9299 |
| 6:31607942 | 0.4594 | 0.8529 |
| 6:31421112 | 0.4597 | 0.9325 |
| 6:31272553 | 0.4599 | 0.8258 |
| 6:31173906 | 0.4605 | 0.93   |
| 6:32777752 | 0.4624 | 1.0904 |
| 6:31171486 | 0.4629 | 0.9304 |
| 6:31498737 | 0.4635 | 1.0588 |
| 6:32283844 | 0.4644 | 0.8978 |
| 6:30174131 | 0.4654 | 0.9446 |
| 6:31174385 | 0.4654 | 0.9307 |
| 6:31386019 | 0.4659 | 0.8567 |
| 6:29768503 | 0.4671 | 1.1954 |
| 6:31354238 | 0.4671 | 0.9219 |
| 6:30046848 | 0.4677 | 0.8882 |
| 6:31075481 | 0.4688 | 0.9542 |
| 6:31488038 | 0.4691 | 1.0583 |
| 6:31867253 | 0.4691 | 1.123  |
| 6:29698050 | 0.4692 | 0.9229 |
| 6:32817033 | 0.4696 | 0.8804 |
| 6:32279902 | 0.47   | 0.899  |
| 6:31172655 | 0.4705 | 0.9314 |
| 6:32820334 | 0.4719 | 0.881  |
| 6:32266425 | 0.4723 | 0.8995 |
| 6:32818236 | 0.4724 | 0.8811 |
| 6:30991559 | 0.4727 | 0.8714 |
| 6:31165527 | 0.4727 | 0.9318 |
| 6:32736079 | 0.4728 | 0.8784 |
| 6:31181025 | 0.4731 | 0.9322 |
| 6:31446366 | 0.4735 | 0.9036 |
| 6:30982858 | 0.4738 | 0.8198 |
| 6:32875323 | 0.474  | 0.9224 |

|            |        |        |
|------------|--------|--------|
| 6:30256936 | 0.4742 | 0.9437 |
| 6:32636280 | 0.4748 | 0.9458 |
| 6:30988017 | 0.4752 | 0.82   |
| 6:31185803 | 0.4773 | 0.9326 |
| 6:30166266 | 0.478  | 0.9461 |
| 6:31188267 | 0.4792 | 0.9502 |
| 6:31184175 | 0.4798 | 0.933  |
| 6:29766969 | 0.48   | 0.9543 |
| 6:31180055 | 0.4802 | 0.9331 |
| 6:31180642 | 0.4802 | 0.9332 |
| 6:30045495 | 0.4825 | 0.8918 |
| 6:31158689 | 0.4837 | 0.9335 |
| 6:30342753 | 0.4842 | 0.9338 |
| 6:32657627 | 0.4842 | 1.1143 |
| 6:31105672 | 0.4851 | 1.2323 |
| 6:31050348 | 0.4866 | 0.9511 |
| 6:31245080 | 0.4872 | 0.8878 |
| 6:32102680 | 0.4876 | 0.8722 |
| 6:30285524 | 0.4877 | 0.9011 |
| 6:31192998 | 0.4882 | 0.9512 |
| 6:31347070 | 0.4901 | 0.9415 |
| 6:32851937 | 0.4902 | 0.8759 |
| 6:30045491 | 0.4911 | 0.8937 |
| 6:33053609 | 0.4925 | 1.106  |
| 6:31184425 | 0.4929 | 1.082  |
| 6:30046292 | 0.4954 | 0.8947 |
| 6:30045882 | 0.4959 | 0.8949 |
| 6:32652196 | 0.4962 | 0.9355 |
| 6:29745884 | 0.4971 | 0.9565 |
| 6:31417647 | 0.4976 | 0.8603 |
| 6:32879233 | 0.4992 | 0.9261 |
| 6:31417510 | 0.5021 | 0.8609 |
| 6:29720726 | 0.5025 | 1.1549 |
| 6:29916368 | 0.504  | 1.1136 |
| 6:32854706 | 0.5057 | 0.8895 |
| 6:30047612 | 0.508  | 0.8976 |
| 6:30047174 | 0.5082 | 0.8977 |
| 6:30028913 | 0.5085 | 0.9154 |
| 6:31416536 | 0.5094 | 0.8642 |
| 6:32914758 | 0.5101 | 0.8526 |
| 6:30120637 | 0.5106 | 0.926  |
| 6:32074804 | 0.5109 | 0.8766 |
| 6:29909797 | 0.5126 | 1.1086 |

|            |        |        |
|------------|--------|--------|
| 6:32401327 | 0.5137 | 0.9043 |
| 6:29736995 | 0.5139 | 0.9582 |
| 6:30062058 | 0.514  | 0.9162 |
| 6:29745794 | 0.5147 | 0.9583 |
| 6:29829566 | 0.5152 | 0.9085 |
| 6:32900718 | 0.5158 | 1.0572 |
| 6:32946133 | 0.5162 | 1.0405 |
| 6:31240479 | 0.5173 | 0.895  |
| 6:30734255 | 0.5193 | 1.0716 |
| 6:29772395 | 0.5199 | 0.9573 |
| 6:32944746 | 0.5204 | 1.0402 |
| 6:29735104 | 0.5226 | 0.959  |
| 6:29944184 | 0.5233 | 1.0845 |
| 6:29957802 | 0.5254 | 0.9186 |
| 6:30025210 | 0.5255 | 0.9186 |
| 6:30719909 | 0.5256 | 0.8924 |
| 6:29963622 | 0.5268 | 0.9189 |
| 6:32802462 | 0.5288 | 0.8766 |
| 6:31425985 | 0.5291 | 0.864  |
| 6:29699253 | 0.5297 | 1.1643 |
| 6:29962268 | 0.5308 | 0.9195 |
| 6:31093914 | 0.532  | 1.2153 |
| 6:30163955 | 0.533  | 0.952  |
| 6:29703823 | 0.5332 | 1.1092 |
| 6:29993086 | 0.5358 | 0.9208 |
| 6:33005070 | 0.536  | 0.842  |
| 6:29765001 | 0.5361 | 0.9591 |
| 6:29955025 | 0.5364 | 0.9207 |
| 6:33004287 | 0.5368 | 0.8414 |
| 6:31566507 | 0.5378 | 0.8985 |
| 6:30057675 | 0.5385 | 0.921  |
| 6:29992286 | 0.5391 | 0.921  |
| 6:29956953 | 0.5396 | 0.9213 |
| 6:29704545 | 0.5399 | 1.108  |
| 6:32393150 | 0.5403 | 0.9104 |
| 6:31248568 | 0.5404 | 0.9002 |
| 6:29969040 | 0.5409 | 0.9215 |
| 6:29980073 | 0.5411 | 0.9217 |
| 6:29708028 | 0.5412 | 1.1079 |
| 6:31352232 | 0.5436 | 1.0629 |
| 6:29945508 | 0.5439 | 0.9221 |
| 6:29774856 | 0.5442 | 0.9561 |
| 6:29830505 | 0.5442 | 1.1003 |

|            |        |        |
|------------|--------|--------|
| 6:29961631 | 0.5442 | 0.9266 |
| 6:29742108 | 0.5448 | 0.9543 |
| 6:32589095 | 0.5448 | 0.8963 |
| 6:32974843 | 0.545  | 1.0517 |
| 6:30036083 | 0.5456 | 0.9222 |
| 6:32835994 | 0.5476 | 0.9006 |
| 6:32906716 | 0.5479 | 0.8576 |
| 6:32908211 | 0.5479 | 0.8576 |
| 6:32918124 | 0.5479 | 0.8576 |
| 6:32909098 | 0.5497 | 0.8579 |
| 6:32907502 | 0.5507 | 0.8597 |
| 6:32908266 | 0.5507 | 0.8597 |
| 6:30022425 | 0.5512 | 0.9233 |
| 6:29762068 | 0.5514 | 0.9535 |
| 6:30184704 | 0.5527 | 0.9194 |
| 6:31379198 | 0.553  | 0.9491 |
| 6:32915852 | 0.553  | 0.8583 |
| 6:29945368 | 0.5535 | 0.9238 |
| 6:32682174 | 0.5549 | 0.9162 |
| 6:32844032 | 0.5549 | 0.8979 |
| 6:32911835 | 0.5549 | 0.8586 |
| 6:32911917 | 0.5549 | 0.8586 |
| 6:29742299 | 0.5556 | 0.9574 |
| 6:29945741 | 0.5559 | 0.9243 |
| 6:30030057 | 0.5564 | 0.9244 |
| 6:30030135 | 0.5564 | 0.9244 |
| 6:30005043 | 0.557  | 0.9245 |
| 6:29942866 | 0.5571 | 0.9245 |
| 6:32202597 | 0.5573 | 0.9343 |
| 6:31085770 | 0.5577 | 0.9343 |
| 6:30036269 | 0.558  | 0.9246 |
| 6:29950583 | 0.5582 | 0.929  |
| 6:29985325 | 0.5584 | 0.9248 |
| 6:30033690 | 0.5584 | 0.9247 |
| 6:31651194 | 0.5588 | 1.0921 |
| 6:29988740 | 0.559  | 0.9249 |
| 6:30044914 | 0.56   | 0.925  |
| 6:29987738 | 0.5614 | 0.9253 |
| 6:30061293 | 0.5614 | 0.9251 |
| 6:29966175 | 0.5616 | 0.9253 |
| 6:29970685 | 0.5616 | 0.9253 |
| 6:29967529 | 0.5627 | 0.9255 |
| 6:30039662 | 0.5638 | 1.0548 |



|            |        |        |
|------------|--------|--------|
| 6:30039845 | 0.564  | 1.0548 |
| 6:29979125 | 0.5642 | 0.9258 |
| 6:31244475 | 0.5655 | 0.9449 |
| 6:32785275 | 0.5662 | 0.9377 |
| 6:30046752 | 0.5668 | 0.9262 |
| 6:32984451 | 0.567  | 0.9651 |
| 6:32713267 | 0.5674 | 0.9407 |
| 6:32372032 | 0.568  | 1.117  |
| 6:29980445 | 0.5689 | 0.9267 |
| 6:29967999 | 0.5711 | 0.927  |
| 6:31245476 | 0.5715 | 0.9457 |
| 6:29991538 | 0.5717 | 0.9271 |
| 6:30036528 | 0.5719 | 0.8266 |
| 6:30040810 | 0.5721 | 1.0537 |
| 6:32711178 | 0.5723 | 0.9063 |
| 6:31027516 | 0.5728 | 1.0513 |
| 6:29975587 | 0.5735 | 0.9275 |
| 6:31245508 | 0.5742 | 0.9461 |
| 6:30039901 | 0.5743 | 1.0533 |
| 6:32785035 | 0.5771 | 0.9394 |
| 6:30039484 | 0.5776 | 0.9281 |
| 6:32785029 | 0.5813 | 0.94   |
| 6:30267886 | 0.5814 | 0.9235 |
| 6:30410206 | 0.5823 | 1.0454 |
| 6:29979579 | 0.5828 | 1.0521 |
| 6:30004052 | 0.583  | 1.0521 |
| 6:30666594 | 0.5831 | 0.7875 |
| 6:29793724 | 0.5839 | 1.0561 |
| 6:29818662 | 0.5841 | 1.0901 |
| 6:30260982 | 0.5842 | 0.9228 |
| 6:32954634 | 0.5844 | 1.034  |
| 6:32811366 | 0.5859 | 0.9117 |
| 6:29769829 | 0.5895 | 0.9645 |
| 6:29820586 | 0.5895 | 1.0867 |
| 6:29819077 | 0.5899 | 1.0802 |
| 6:29969973 | 0.5901 | 0.9305 |
| 6:31246015 | 0.5902 | 0.9483 |
| 6:31078615 | 0.5911 | 0.9676 |
| 6:29988439 | 0.5924 | 0.931  |
| 6:32905853 | 0.5927 | 0.8807 |
| 6:30007493 | 0.5943 | 0.9351 |
| 6:31439958 | 0.5947 | 0.9628 |
| 6:30041009 | 0.5952 | 1.0504 |

|            |        |        |
|------------|--------|--------|
| 6:31410597 | 0.5957 | 0.9596 |
| 6:32905685 | 0.5981 | 0.8814 |
| 6:29913969 | 0.5999 | 0.9537 |
| 6:33016728 | 0.6003 | 1.0346 |
| 6:30633875 | 0.6007 | 1.0694 |
| 6:31925697 | 0.6008 | 1.0832 |
| 6:29785235 | 0.6014 | 1.0662 |
| 6:31246676 | 0.6038 | 0.9502 |
| 6:29711041 | 0.6046 | 0.8816 |
| 6:29773999 | 0.6048 | 0.9643 |
| 6:30716117 | 0.6055 | 1.1312 |
| 6:30025759 | 0.6062 | 0.9372 |
| 6:31243347 | 0.6085 | 0.9615 |
| 6:30328753 | 0.6092 | 0.9274 |
| 6:31245309 | 0.6097 | 0.9507 |
| 6:30296071 | 0.6098 | 0.9518 |
| 6:29821982 | 0.6121 | 1.0824 |
| 6:31344238 | 0.6131 | 1.0523 |
| 6:32961387 | 0.6143 | 1.0313 |
| 6:31351090 | 0.6149 | 0.9272 |
| 6:29932666 | 0.6152 | 1.0416 |
| 6:30041708 | 0.6184 | 1.0675 |
| 6:30151954 | 0.6188 | 0.9322 |
| 6:33047898 | 0.6197 | 1.0566 |
| 6:29968275 | 0.6218 | 0.9399 |
| 6:29958674 | 0.6221 | 0.9355 |
| 6:32788137 | 0.6221 | 0.9556 |
| 6:31443844 | 0.6226 | 0.9459 |
| 6:32795032 | 0.6246 | 0.9494 |
| 6:30159266 | 0.6255 | 0.9335 |
| 6:30544401 | 0.6258 | 0.946  |
| 6:30001770 | 0.6288 | 0.941  |
| 6:30002860 | 0.6288 | 0.941  |
| 6:30168301 | 0.6293 | 0.9341 |
| 6:30170699 | 0.6293 | 0.9341 |
| 6:33016087 | 0.6322 | 1.0314 |
| 6:30055933 | 0.6345 | 0.9369 |
| 6:31242445 | 0.6345 | 1.0722 |
| 6:29809194 | 0.6354 | 0.9523 |
| 6:31062133 | 0.636  | 0.908  |
| 6:31091992 | 0.6369 | 0.8939 |
| 6:31691657 | 0.6369 | 0.9045 |
| 6:30077135 | 0.638  | 1.0573 |

|            |        |        |
|------------|--------|--------|
| 6:32981555 | 0.6387 | 0.8879 |
| 6:31274027 | 0.639  | 1.1403 |
| 6:32992424 | 0.6398 | 0.8877 |
| 6:32983260 | 0.6422 | 0.89   |
| 6:32983584 | 0.6422 | 0.89   |
| 6:29767611 | 0.6424 | 1.0896 |
| 6:32983904 | 0.6425 | 0.8902 |
| 6:29966620 | 0.6427 | 0.9395 |
| 6:29968764 | 0.6427 | 0.9403 |
| 6:32988293 | 0.6443 | 0.8913 |
| 6:32989175 | 0.6449 | 0.8909 |
| 6:32372321 | 0.6456 | 1.0551 |
| 6:29933000 | 0.6478 | 1.0377 |
| 6:30031345 | 0.6485 | 0.9592 |
| 6:31099577 | 0.6485 | 0.9481 |
| 6:29706691 | 0.649  | 0.9091 |
| 6:33024908 | 0.6541 | 0.9602 |
| 6:31001166 | 0.6546 | 0.9605 |
| 6:31058627 | 0.6548 | 0.9053 |
| 6:30511170 | 0.6568 | 1.0513 |
| 6:31060115 | 0.657  | 0.9071 |
| 6:31075115 | 0.6588 | 0.9092 |
| 6:31059900 | 0.6591 | 0.9075 |
| 6:31060162 | 0.6591 | 0.9075 |
| 6:31061439 | 0.6591 | 0.9075 |
| 6:30986554 | 0.6596 | 1.0811 |
| 6:33005932 | 0.6598 | 0.9677 |
| 6:30026350 | 0.6602 | 0.9417 |
| 6:31077938 | 0.661  | 0.9096 |
| 6:31073903 | 0.6613 | 0.9097 |
| 6:31059386 | 0.6616 | 0.9081 |
| 6:30311932 | 0.6621 | 0.9335 |
| 6:31062363 | 0.6627 | 0.9087 |
| 6:29813942 | 0.6628 | 0.956  |
| 6:32372396 | 0.6649 | 1.053  |
| 6:31075375 | 0.665  | 0.9103 |
| 6:32372007 | 0.6651 | 1.0527 |
| 6:32372328 | 0.6651 | 1.0527 |
| 6:32372112 | 0.6658 | 1.0524 |
| 6:29806622 | 0.666  | 0.9565 |
| 6:32372236 | 0.666  | 1.0521 |
| 6:32983765 | 0.6662 | 1.0549 |
| 6:32373185 | 0.6664 | 1.0521 |

|            |        |        |
|------------|--------|--------|
| 6:29805199 | 0.6672 | 1.1002 |
| 6:30044827 | 0.6691 | 1.0373 |
| 6:31068420 | 0.6735 | 0.9119 |
| 6:31384479 | 0.6748 | 0.949  |
| 6:32672624 | 0.676  | 0.9606 |
| 6:33008546 | 0.6778 | 0.9478 |
| 6:29988642 | 0.6785 | 0.9506 |
| 6:29733223 | 0.6796 | 0.9727 |
| 6:29823027 | 0.6796 | 1.0626 |
| 6:31448818 | 0.6804 | 0.9524 |
| 6:32359821 | 0.6805 | 0.8956 |
| 6:32988588 | 0.6805 | 0.9547 |
| 6:31448653 | 0.6826 | 0.9527 |
| 6:29830074 | 0.6848 | 1.0763 |
| 6:32787310 | 0.6856 | 0.9478 |
| 6:29820717 | 0.6857 | 1.0617 |
| 6:29694680 | 0.686  | 1.0634 |
| 6:33017457 | 0.6877 | 1.0353 |
| 6:31042217 | 0.6885 | 0.9738 |
| 6:32971708 | 0.6896 | 0.9574 |
| 6:31540556 | 0.69   | 0.973  |
| 6:30141204 | 0.6902 | 0.947  |
| 6:32981848 | 0.6911 | 1.0973 |
| 6:31442137 | 0.6912 | 0.9612 |
| 6:31256746 | 0.692  | 1.0588 |
| 6:29937242 | 0.6924 | 0.9615 |
| 6:29762693 | 0.6929 | 0.974  |
| 6:32783387 | 0.694  | 0.9249 |
| 6:31259338 | 0.6943 | 1.0585 |
| 6:32981937 | 0.6952 | 1.0924 |
| 6:32026808 | 0.6961 | 0.9453 |
| 6:29812834 | 0.6963 | 0.9605 |
| 6:29800142 | 0.6964 | 0.9607 |
| 6:32421798 | 0.6969 | 1.0437 |
| 6:29828493 | 0.6971 | 1.06   |
| 6:29828886 | 0.6971 | 1.06   |
| 6:29829577 | 0.6971 | 1.06   |
| 6:29823994 | 0.6975 | 1.06   |
| 6:30206186 | 0.6983 | 0.9468 |
| 6:32737507 | 0.6983 | 0.9538 |
| 6:29823319 | 0.6985 | 1.0595 |
| 6:30900435 | 0.6987 | 1.0738 |
| 6:29828916 | 0.6996 | 1.0596 |

|            |        |        |
|------------|--------|--------|
| 6:31914179 | 0.6997 | 0.9593 |
| 6:29768917 | 0.7007 | 1.0308 |
| 6:30176122 | 0.7007 | 0.9476 |
| 6:29824092 | 0.701  | 1.0594 |
| 6:31453618 | 0.7011 | 0.9562 |
| 6:32338326 | 0.7013 | 0.9065 |
| 6:29831008 | 0.7015 | 1.0594 |
| 6:30119890 | 0.7023 | 0.9561 |
| 6:29780529 | 0.7029 | 0.9749 |
| 6:29812030 | 0.7032 | 0.9614 |
| 6:29812454 | 0.7035 | 0.9614 |
| 6:31446557 | 0.7037 | 0.9556 |
| 6:30194917 | 0.7056 | 0.9486 |
| 6:31266335 | 0.7065 | 1.0558 |
| 6:32730940 | 0.7073 | 0.9569 |
| 6:29691303 | 0.7081 | 1.0556 |
| 6:29932433 | 0.7085 | 0.9509 |
| 6:31261983 | 0.7095 | 1.0552 |
| 6:31255183 | 0.7108 | 1.055  |
| 6:31259837 | 0.7108 | 1.055  |
| 6:31260040 | 0.7108 | 1.055  |
| 6:30211782 | 0.7112 | 1.0843 |
| 6:29739906 | 0.7123 | 0.9757 |
| 6:29827788 | 0.7129 | 1.0576 |
| 6:32782149 | 0.7129 | 0.9522 |
| 6:29997312 | 0.7136 | 0.9509 |
| 6:30209099 | 0.7142 | 1.0836 |
| 6:32792693 | 0.7143 | 1.0762 |
| 6:30213924 | 0.7145 | 1.0835 |
| 6:29765291 | 0.7146 | 0.9759 |
| 6:31261492 | 0.7153 | 1.0541 |
| 6:29776322 | 0.7165 | 0.976  |
| 6:29992737 | 0.7165 | 0.9556 |
| 6:31261137 | 0.7179 | 1.0535 |
| 6:29696849 | 0.7207 | 1.0546 |
| 6:30794617 | 0.722  | 1.0264 |
| 6:29736229 | 0.7222 | 0.9765 |
| 6:30211660 | 0.7223 | 1.0791 |
| 6:30211755 | 0.7228 | 1.079  |
| 6:29736601 | 0.7233 | 0.9767 |
| 6:31260105 | 0.7234 | 1.0524 |
| 6:29693499 | 0.7237 | 1.0534 |
| 6:29768123 | 0.7242 | 0.9545 |

|            |        |        |
|------------|--------|--------|
| 6:31255465 | 0.7251 | 1.0521 |
| 6:30213936 | 0.7253 | 1.0778 |
| 6:31063233 | 0.7257 | 0.9281 |
| 6:29929253 | 0.7263 | 1.083  |
| 6:29696245 | 0.7267 | 1.0529 |
| 6:29809382 | 0.7301 | 0.9645 |
| 6:32985199 | 0.7303 | 1.0289 |
| 6:32788511 | 0.731  | 0.9241 |
| 6:29928649 | 0.7321 | 1.0816 |
| 6:33025044 | 0.7349 | 0.9699 |
| 6:32997674 | 0.7351 | 1.0218 |
| 6:29991867 | 0.7367 | 0.9589 |
| 6:31053257 | 0.7403 | 0.9264 |
| 6:32216147 | 0.7417 | 1.0589 |
| 6:29782868 | 0.7444 | 0.9785 |
| 6:29979797 | 0.7445 | 0.9611 |
| 6:30081189 | 0.7452 | 0.9688 |
| 6:31735631 | 0.7452 | 0.9164 |
| 6:32977315 | 0.7466 | 0.945  |
| 6:31717696 | 0.7473 | 0.9201 |
| 6:29828880 | 0.748  | 1.0433 |
| 6:31733650 | 0.7505 | 0.9209 |
| 6:29931798 | 0.751  | 0.9618 |
| 6:31243830 | 0.7519 | 0.8978 |
| 6:32787119 | 0.7535 | 0.9406 |
| 6:31702710 | 0.7541 | 0.923  |
| 6:29761516 | 0.7549 | 0.9787 |
| 6:32379506 | 0.7549 | 0.9136 |
| 6:30081246 | 0.7555 | 0.9711 |
| 6:30079993 | 0.7587 | 0.9714 |
| 6:32791313 | 0.7595 | 1.0643 |
| 6:32791831 | 0.7605 | 1.064  |
| 6:30066097 | 0.7609 | 1.0339 |
| 6:32998238 | 0.7612 | 1.0209 |
| 6:31374579 | 0.7624 | 0.9678 |
| 6:29835999 | 0.7631 | 1.04   |
| 6:32793423 | 0.7644 | 1.0629 |
| 6:32793957 | 0.7644 | 1.0629 |
| 6:32793958 | 0.7644 | 1.0629 |
| 6:32793970 | 0.7644 | 1.0629 |
| 6:32794119 | 0.7644 | 1.0629 |
| 6:31259834 | 0.7657 | 1.044  |
| 6:31384431 | 0.767  | 1.0513 |

|            |        |        |
|------------|--------|--------|
| 6:32383138 | 0.7678 | 1.0373 |
| 6:30070937 | 0.7682 | 1.0297 |
| 6:33024738 | 0.7693 | 0.9688 |
| 6:29788606 | 0.7708 | 0.9776 |
| 6:32990121 | 0.7719 | 0.963  |
| 6:31846741 | 0.7721 | 0.9662 |
| 6:31112075 | 0.7728 | 0.9413 |
| 6:29782470 | 0.7738 | 0.981  |
| 6:31061013 | 0.7767 | 1.0261 |
| 6:29822174 | 0.7771 | 1.0375 |
| 6:32374382 | 0.7778 | 0.9183 |
| 6:31589735 | 0.7784 | 0.9364 |
| 6:29806341 | 0.7819 | 0.9642 |
| 6:30065298 | 0.7827 | 0.969  |
| 6:30109207 | 0.7831 | 1.0558 |
| 6:30069795 | 0.7844 | 1.0333 |
| 6:33038134 | 0.7851 | 0.9756 |
| 6:30079129 | 0.7871 | 0.9761 |
| 6:33031689 | 0.7874 | 0.976  |
| 6:32374640 | 0.7875 | 0.9216 |
| 6:31838940 | 0.7889 | 1.1063 |
| 6:29943035 | 0.7892 | 1.0221 |
| 6:33038982 | 0.7896 | 0.9761 |
| 6:30728290 | 0.7909 | 1.0183 |
| 6:32792640 | 0.7918 | 1.0585 |
| 6:30067892 | 0.7923 | 1.0322 |
| 6:30071330 | 0.7924 | 0.9819 |
| 6:33024711 | 0.7959 | 0.9725 |
| 6:33007752 | 0.7978 | 0.969  |
| 6:30294590 | 0.7988 | 0.9665 |
| 6:31029282 | 0.7997 | 1.0409 |
| 6:29759823 | 0.8001 | 0.9801 |
| 6:32968276 | 0.8018 | 0.9838 |
| 6:31766844 | 0.8021 | 0.9622 |
| 6:29992261 | 0.8044 | 1.0241 |
| 6:33039652 | 0.8045 | 0.9779 |
| 6:32969457 | 0.8054 | 0.9843 |
| 6:30030689 | 0.8097 | 1.0254 |
| 6:29820503 | 0.81   | 0.969  |
| 6:29940106 | 0.8102 | 1.0204 |
| 6:30065575 | 0.8104 | 1.0333 |
| 6:33040654 | 0.8109 | 0.9786 |
| 6:32987774 | 0.8111 | 0.9705 |

|            |        |        |
|------------|--------|--------|
| 6:30035341 | 0.8148 | 0.9695 |
| 6:29718544 | 0.8154 | 0.966  |
| 6:29828270 | 0.8158 | 0.9702 |
| 6:29782027 | 0.823  | 1.0312 |
| 6:32379011 | 0.8237 | 0.9024 |
| 6:30242171 | 0.824  | 0.9607 |
| 6:30081742 | 0.8243 | 1.0571 |
| 6:33034404 | 0.8252 | 1.0251 |
| 6:32378866 | 0.8253 | 0.9036 |
| 6:32379239 | 0.8253 | 0.9036 |
| 6:32377470 | 0.826  | 0.904  |
| 6:32377539 | 0.826  | 0.904  |
| 6:32378834 | 0.826  | 0.904  |
| 6:32378982 | 0.826  | 0.904  |
| 6:32379047 | 0.826  | 0.904  |
| 6:32379101 | 0.826  | 0.904  |
| 6:32379445 | 0.8261 | 0.904  |
| 6:29829871 | 0.8264 | 1.0289 |
| 6:29945949 | 0.8288 | 0.9789 |
| 6:32376882 | 0.8294 | 0.9054 |
| 6:32376932 | 0.8294 | 0.9054 |
| 6:29836524 | 0.8295 | 0.9723 |
| 6:30054757 | 0.8298 | 0.9792 |
| 6:31392906 | 0.8302 | 0.9758 |
| 6:32321554 | 0.8302 | 1.038  |
| 6:32942354 | 0.8311 | 0.9142 |
| 6:31457178 | 0.8327 | 0.9839 |
| 6:32380262 | 0.833  | 0.9071 |
| 6:31265695 | 0.8338 | 1.031  |
| 6:30066031 | 0.8341 | 1.0197 |
| 6:33049309 | 0.8342 | 1.0625 |
| 6:29746869 | 0.8352 | 0.9852 |
| 6:29719561 | 0.8361 | 0.9714 |
| 6:33049384 | 0.8374 | 1.0614 |
| 6:29702061 | 0.8375 | 1.0275 |
| 6:31140615 | 0.8375 | 1.0576 |
| 6:29745726 | 0.8379 | 0.9865 |
| 6:32381210 | 0.8383 | 0.906  |
| 6:29717826 | 0.8386 | 0.9715 |
| 6:31425033 | 0.8399 | 0.9469 |
| 6:31418124 | 0.8408 | 0.9469 |
| 6:30127873 | 0.8412 | 0.9759 |
| 6:33006222 | 0.8427 | 1.0135 |



|            |        |        |
|------------|--------|--------|
| 6:31173933 | 0.8435 | 1.0591 |
| 6:33026524 | 0.8437 | 1.023  |
| 6:33026517 | 0.8444 | 1.0229 |
| 6:31235751 | 0.8448 | 1.024  |
| 6:29782690 | 0.8454 | 1.0283 |
| 6:31780594 | 0.8454 | 0.9394 |
| 6:29704316 | 0.8463 | 1.0259 |
| 6:29771879 | 0.8472 | 0.9842 |
| 6:29709812 | 0.8476 | 1.0254 |
| 6:31494738 | 0.8487 | 0.9263 |
| 6:30055377 | 0.849  | 0.9816 |
| 6:32787592 | 0.849  | 0.9394 |
| 6:31419042 | 0.8492 | 0.9493 |
| 6:32976759 | 0.8502 | 0.9884 |
| 6:31419800 | 0.8514 | 0.95   |
| 6:33042880 | 0.8524 | 0.9833 |
| 6:29913137 | 0.8528 | 0.9752 |
| 6:30083182 | 0.8556 | 0.9825 |
| 6:30679333 | 0.8557 | 0.9687 |
| 6:32968598 | 0.8559 | 0.9872 |
| 6:32972903 | 0.8566 | 0.9839 |
| 6:32666802 | 0.8575 | 1.0151 |
| 6:33036853 | 0.8575 | 1.021  |
| 6:33032188 | 0.8577 | 1.0214 |
| 6:31093587 | 0.8593 | 0.9864 |
| 6:30137649 | 0.8607 | 0.9788 |
| 6:33042551 | 0.8609 | 0.9567 |
| 6:31140445 | 0.8625 | 1.0497 |
| 6:33035616 | 0.8626 | 1.0494 |
| 6:32682019 | 0.8635 | 0.984  |
| 6:30015167 | 0.8643 | 0.9856 |
| 6:32968856 | 0.8646 | 0.988  |
| 6:32784676 | 0.8647 | 0.9654 |
| 6:33036617 | 0.8648 | 1.0204 |
| 6:33036631 | 0.8648 | 1.0204 |
| 6:30234991 | 0.8651 | 1.0481 |
| 6:33036233 | 0.8658 | 1.0203 |
| 6:32374262 | 0.8665 | 1.0181 |
| 6:30608273 | 0.8669 | 1.0274 |
| 6:31100942 | 0.8672 | 0.9685 |
| 6:32595682 | 0.8675 | 1.0251 |
| 6:32665728 | 0.8678 | 1.014  |
| 6:33036210 | 0.8679 | 1.02   |

|            |        |        |
|------------|--------|--------|
| 6:29715997 | 0.8685 | 0.9779 |
| 6:32161324 | 0.8692 | 0.9673 |
| 6:32969745 | 0.8694 | 1.0192 |
| 6:32666822 | 0.8702 | 1.0137 |
| 6:33030470 | 0.8715 | 1.0196 |
| 6:33033022 | 0.8715 | 1.0196 |
| 6:32270731 | 0.872  | 1.0292 |
| 6:29783382 | 0.8721 | 1.0235 |
| 6:33036999 | 0.8727 | 1.0194 |
| 6:32666875 | 0.8729 | 1.0134 |
| 6:33036971 | 0.873  | 1.0194 |
| 6:33032822 | 0.8738 | 1.0191 |
| 6:31336960 | 0.8748 | 1.0173 |
| 6:31004521 | 0.875  | 1.0576 |
| 6:31095801 | 0.8751 | 0.9879 |
| 6:33025440 | 0.8762 | 1.0451 |
| 6:33025469 | 0.8762 | 1.0451 |
| 6:33032272 | 0.8763 | 1.0189 |
| 6:33034166 | 0.8769 | 1.0448 |
| 6:33032347 | 0.8775 | 1.0186 |
| 6:33037611 | 0.8782 | 1.0444 |
| 6:32974551 | 0.8786 | 1.0197 |
| 6:32978328 | 0.8787 | 0.9725 |
| 6:33025884 | 0.8791 | 1.0441 |
| 6:30022578 | 0.88   | 1.0159 |
| 6:32789807 | 0.8808 | 0.9639 |
| 6:33035877 | 0.8808 | 1.0182 |
| 6:30609661 | 0.8812 | 1.0244 |
| 6:29785776 | 0.8813 | 0.9838 |
| 6:32924584 | 0.8827 | 1.009  |
| 6:33042598 | 0.8831 | 0.9631 |
| 6:32955976 | 0.8833 | 1.0089 |
| 6:33026553 | 0.8845 | 1.0179 |
| 6:32163799 | 0.8851 | 0.9709 |
| 6:33035771 | 0.8851 | 1.0422 |
| 6:33025493 | 0.8857 | 0.9615 |
| 6:30072511 | 0.8905 | 1.0107 |
| 6:32789168 | 0.8906 | 0.9664 |
| 6:33037265 | 0.8907 | 1.0171 |
| 6:29785538 | 0.8931 | 0.9859 |
| 6:32411035 | 0.8934 | 0.9293 |
| 6:32698988 | 0.8935 | 1.0471 |
| 6:33037279 | 0.8936 | 1.0165 |

|            |        |        |
|------------|--------|--------|
| 6:33034421 | 0.895  | 1.0165 |
| 6:33037082 | 0.8961 | 1.0161 |
| 6:32302163 | 0.8972 | 1.0233 |
| 6:30072721 | 0.8974 | 1.0101 |
| 6:32968412 | 0.8976 | 0.9842 |
| 6:33037142 | 0.8976 | 1.0161 |
| 6:31370367 | 0.8987 | 0.9856 |
| 6:32789197 | 0.8987 | 0.9685 |
| 6:29786732 | 0.8993 | 0.9865 |
| 6:32971108 | 0.8994 | 0.978  |
| 6:33037640 | 0.8995 | 1.0365 |
| 6:29939544 | 0.8998 | 0.9822 |
| 6:30035089 | 0.9012 | 1.0131 |
| 6:29833033 | 0.9016 | 1.0107 |
| 6:32635954 | 0.9018 | 0.9884 |
| 6:33037557 | 0.9022 | 0.9891 |
| 6:30002881 | 0.9024 | 0.9869 |
| 6:31080718 | 0.9038 | 0.9834 |
| 6:33026673 | 0.9046 | 1.0152 |
| 6:33032831 | 0.9078 | 1.0149 |
| 6:33036435 | 0.908  | 1.0148 |
| 6:29957982 | 0.9082 | 0.9848 |
| 6:32315722 | 0.9094 | 1.0205 |
| 6:32985594 | 0.91   | 0.9877 |
| 6:31379752 | 0.9106 | 1.0188 |
| 6:32935179 | 0.9106 | 1.0068 |
| 6:29782633 | 0.9108 | 0.9928 |
| 6:33016887 | 0.9109 | 1.0076 |
| 6:29940679 | 0.9124 | 0.9832 |
| 6:29950140 | 0.9126 | 0.991  |
| 6:29839268 | 0.914  | 0.9885 |
| 6:30128442 | 0.9149 | 0.9871 |
| 6:29700183 | 0.915  | 0.9809 |
| 6:30080496 | 0.9153 | 0.9909 |
| 6:30681980 | 0.9153 | 0.9816 |
| 6:33039855 | 0.9167 | 0.9882 |
| 6:32054934 | 0.917  | 0.9764 |
| 6:30670700 | 0.919  | 0.9824 |
| 6:29765087 | 0.9212 | 1.0116 |
| 6:31025051 | 0.922  | 1.0082 |
| 6:30293483 | 0.9227 | 0.9887 |
| 6:30278112 | 0.923  | 0.9887 |
| 6:30224889 | 0.9233 | 0.9888 |

|            |        |        |
|------------|--------|--------|
| 6:33012770 | 0.9241 | 0.9893 |
| 6:33025450 | 0.9245 | 0.976  |
| 6:31387557 | 0.9249 | 0.9873 |
| 6:30187290 | 0.9267 | 0.978  |
| 6:30649540 | 0.9268 | 0.9839 |
| 6:30649134 | 0.9282 | 0.9842 |
| 6:33037580 | 0.9282 | 1.0101 |
| 6:31074128 | 0.9288 | 0.9849 |
| 6:33031677 | 0.9295 | 1.0116 |
| 6:32995962 | 0.9304 | 0.9935 |
| 6:31229644 | 0.9313 | 1.0105 |
| 6:31390410 | 0.9322 | 0.9884 |
| 6:32335657 | 0.9332 | 1.0151 |
| 6:32972642 | 0.9338 | 0.9888 |
| 6:31079264 | 0.9343 | 0.9863 |
| 6:30248424 | 0.9352 | 0.9906 |
| 6:30903948 | 0.9354 | 0.9865 |
| 6:32984788 | 0.9359 | 1.0083 |
| 6:31329932 | 0.936  | 0.9942 |
| 6:32969616 | 0.936  | 1.0094 |
| 6:30904535 | 0.9368 | 0.9863 |
| 6:33037768 | 0.9379 | 1.0084 |
| 6:33053577 | 0.9388 | 1.0104 |
| 6:33032975 | 0.9394 | 1.0066 |
| 6:33033894 | 0.9396 | 1.0101 |
| 6:31096575 | 0.9401 | 0.9873 |
| 6:30046246 | 0.941  | 1.0058 |
| 6:32373312 | 0.9433 | 1.0077 |
| 6:31389784 | 0.9448 | 0.9904 |
| 6:29820047 | 0.9458 | 0.9928 |
| 6:29943715 | 0.9465 | 1.0068 |
| 6:29951106 | 0.9481 | 0.9919 |
| 6:32680620 | 0.9483 | 1.0061 |
| 6:31078836 | 0.9488 | 0.989  |
| 6:33037522 | 0.9489 | 1.007  |
| 6:32797309 | 0.9494 | 0.9867 |
| 6:30078275 | 0.9495 | 0.9946 |
| 6:31079242 | 0.9495 | 0.9891 |
| 6:32678491 | 0.9506 | 1.0059 |
| 6:30081334 | 0.9514 | 0.9949 |
| 6:33014313 | 0.9515 | 0.9935 |
| 6:30079307 | 0.9516 | 0.9949 |
| 6:32653263 | 0.9523 | 0.9944 |

|            |        |        |
|------------|--------|--------|
| 6:31058178 | 0.953  | 0.9918 |
| 6:32988049 | 0.953  | 1.0036 |
| 6:33040138 | 0.9538 | 1.0163 |
| 6:32786068 | 0.9548 | 1.0148 |
| 6:30882689 | 0.9581 | 0.991  |
| 6:31082843 | 0.9583 | 0.992  |
| 6:31082361 | 0.9584 | 0.9918 |
| 6:30080274 | 0.9592 | 0.9957 |
| 6:29935372 | 0.9594 | 1.0049 |
| 6:33049965 | 0.9599 | 1.0068 |
| 6:33026388 | 0.9605 | 0.9956 |
| 6:30102184 | 0.9616 | 0.993  |
| 6:29983538 | 0.9626 | 0.9938 |
| 6:32681530 | 0.963  | 1.0044 |
| 6:29725452 | 0.9634 | 1.0138 |
| 6:33037675 | 0.966  | 1.0048 |
| 6:32977044 | 0.9679 | 0.9953 |
| 6:32659878 | 0.9706 | 1.0129 |
| 6:31207351 | 0.9707 | 1.0031 |
| 6:32671247 | 0.9713 | 1.0034 |
| 6:33040781 | 0.9713 | 0.9959 |
| 6:32660943 | 0.972  | 1.0123 |
| 6:29698821 | 0.9722 | 0.9953 |
| 6:32669454 | 0.9726 | 1.0032 |
| 6:32669483 | 0.9726 | 1.0032 |
| 6:32671755 | 0.9726 | 1.0032 |
| 6:33038766 | 0.9729 | 0.9962 |
| 6:33039767 | 0.9729 | 0.9962 |
| 6:29726046 | 0.973  | 0.9937 |
| 6:31218889 | 0.973  | 0.9972 |
| 6:32665319 | 0.973  | 1.0032 |
| 6:33040596 | 0.9736 | 0.9963 |
| 6:31028345 | 0.9739 | 0.9973 |
| 6:32682137 | 0.9739 | 1.0031 |
| 6:33040835 | 0.9741 | 0.9963 |
| 6:31125407 | 0.9743 | 1.0039 |
| 6:32663851 | 0.9746 | 1.0105 |
| 6:31449778 | 0.9747 | 1.0023 |
| 6:31241032 | 0.9752 | 1.0031 |
| 6:33039503 | 0.9755 | 0.9965 |
| 6:32670912 | 0.9757 | 0.9971 |
| 6:32673931 | 0.9758 | 1.0029 |
| 6:33041034 | 0.9758 | 0.9966 |

|            |        |        |
|------------|--------|--------|
| 6:33041176 | 0.976  | 0.9966 |
| 6:33041186 | 0.976  | 0.9966 |
| 6:33040798 | 0.9761 | 0.9966 |
| 6:29776360 | 0.9765 | 0.9976 |
| 6:33038369 | 0.9771 | 0.9968 |
| 6:30028831 | 0.9774 | 0.9961 |
| 6:32667107 | 0.9776 | 1.0026 |
| 6:33039848 | 0.9777 | 0.9968 |
| 6:29910663 | 0.9788 | 0.9959 |
| 6:31030425 | 0.9791 | 0.9978 |
| 6:29941400 | 0.9808 | 0.9965 |
| 6:31085824 | 0.981  | 1.0026 |
| 6:33039606 | 0.981  | 0.9973 |
| 6:29918059 | 0.9813 | 0.9965 |
| 6:31116502 | 0.9816 | 1.0028 |
| 6:33025740 | 0.9816 | 0.9979 |
| 6:29778109 | 0.9817 | 0.9981 |
| 6:33039837 | 0.9819 | 0.9974 |
| 6:29778626 | 0.982  | 0.9981 |
| 6:30882803 | 0.9824 | 0.9962 |
| 6:30078330 | 0.9826 | 1.0019 |
| 6:30610499 | 0.9829 | 1.0044 |
| 6:32666651 | 0.9837 | 1.0019 |
| 6:32666660 | 0.9837 | 1.0019 |
| 6:29808634 | 0.984  | 1.0019 |
| 6:31236250 | 0.9842 | 0.9978 |
| 6:31084170 | 0.9846 | 1.0021 |
| 6:31084639 | 0.9846 | 1.0021 |
| 6:32976654 | 0.987  | 0.9982 |
| 6:30006876 | 0.9872 | 0.9979 |
| 6:31120711 | 0.9873 | 1.0019 |
| 6:32980446 | 0.9879 | 0.9984 |
| 6:33038144 | 0.9881 | 0.9983 |
| 6:33039980 | 0.9884 | 0.9983 |
| 6:29975047 | 0.9893 | 0.9983 |
| 6:31349922 | 0.9898 | 1.0012 |
| 6:32781954 | 0.9905 | 0.9978 |
| 6:30015330 | 0.9907 | 0.9985 |
| 6:33040736 | 0.9915 | 0.9988 |
| 6:29938258 | 0.9926 | 1.0014 |
| 6:29945270 | 0.993  | 0.9991 |
| 6:30875603 | 0.9952 | 1.001  |
| 6:32781433 | 0.9962 | 0.9991 |

|            |        |        |
|------------|--------|--------|
| 6:31051553 | 0.9977 | 0.9996 |
| 6:32373232 | 0.9978 | 1.0003 |
| 6:33037560 | 0.998  | 1.0002 |
| 6:29973910 | 0.9983 | 0.9997 |
| 6:32978997 | 0.9983 | 1.0004 |
| 6:30011934 | 0.9991 | 1.0002 |
| 6:29761522 | 0.9993 | 0.9999 |

**MHC Meta-Analysis Results - Adjus**

| <b>SNP</b> | <b>P-value</b> | <b>OR</b> |
|------------|----------------|-----------|
| 6:32595063 | 5.19E-08       | 2.1626    |
| 6:32186245 | 1.51E-05       | 0.5901    |
| 6:32184345 | 2.18E-05       | 0.6317    |
| 6:32184574 | 3.11E-05       | 0.6354    |
| 6:32186193 | 3.14E-05       | 0.6356    |
| 6:32186872 | 8.95E-05       | 0.6519    |
| 6:32629868 | 0.0002113      | 0.6733    |
| 6:32415109 | 0.0002269      | 1.5487    |
| 6:31537606 | 0.0002739      | 1.3568    |
| 6:32411726 | 0.0002884      | 1.5377    |
| 6:32679992 | 0.0003028      | 1.7789    |
| 6:32372032 | 0.0003595      | 1.5549    |
| 6:31539767 | 0.0004019      | 1.3556    |
| 6:32592737 | 0.0004798      | 1.8595    |
| 6:33054457 | 0.0005431      | 1.2584    |
| 6:32434314 | 0.0005692      | 1.7494    |
| 6:32627700 | 0.0006655      | 0.7302    |
| 6:32414420 | 0.000957       | 1.4393    |
| 6:32413317 | 0.0009825      | 1.4328    |
| 6:33051683 | 0.001151       | 1.245     |
| 6:31513559 | 0.001177       | 1.298     |
| 6:33053682 | 0.001264       | 1.24      |
| 6:33051051 | 0.00127        | 1.2402    |
| 6:33051139 | 0.00127        | 1.2402    |
| 6:33053307 | 0.001303       | 1.2394    |
| 6:33050877 | 0.001304       | 1.2394    |
| 6:31198987 | 0.001305       | 0.7907    |
| 6:33052803 | 0.001315       | 1.2386    |
| 6:33052768 | 0.001332       | 1.2385    |
| 6:33052986 | 0.001348       | 1.2382    |
| 6:33053723 | 0.001354       | 1.2382    |
| 6:33053248 | 0.001371       | 1.2379    |
| 6:33054807 | 0.001371       | 1.2379    |
| 6:33053399 | 0.001375       | 1.2379    |
| 6:31511857 | 0.001391       | 1.2942    |
| 6:32372321 | 0.001449       | 1.4271    |
| 6:32372396 | 0.001488       | 1.4262    |
| 6:32372007 | 0.00152        | 1.425     |



|            |          |        |
|------------|----------|--------|
| 6:32372328 | 0.00152  | 1.425  |
| 6:32602483 | 0.001527 | 0.7389 |
| 6:32372236 | 0.001562 | 1.4237 |
| 6:32373185 | 0.001562 | 1.4237 |
| 6:32372112 | 0.001584 | 1.423  |
| 6:33051640 | 0.001635 | 1.2365 |
| 6:33048694 | 0.001652 | 1.234  |
| 6:33054890 | 0.001677 | 1.2331 |
| 6:31542476 | 0.001788 | 1.3551 |
| 6:32097611 | 0.001788 | 0.6349 |
| 6:32626750 | 0.001846 | 0.6963 |
| 6:33050036 | 0.001911 | 1.2784 |
| 6:32070074 | 0.001937 | 0.6372 |
| 6:31209045 | 0.002009 | 1.2165 |
| 6:31506801 | 0.002228 | 1.2746 |
| 6:32678491 | 0.002252 | 1.3477 |
| 6:32629963 | 0.002277 | 0.7097 |
| 6:32680620 | 0.002287 | 1.3474 |
| 6:33052250 | 0.002294 | 1.2269 |
| 6:32681530 | 0.002357 | 1.345  |
| 6:32671755 | 0.002489 | 1.3438 |
| 6:32671247 | 0.002506 | 1.3434 |
| 6:32669454 | 0.002533 | 1.3431 |
| 6:32669483 | 0.002533 | 1.3431 |
| 6:32673931 | 0.002545 | 1.343  |
| 6:33053271 | 0.002548 | 1.2239 |
| 6:32667107 | 0.002596 | 1.3411 |
| 6:33050024 | 0.002642 | 1.2245 |
| 6:31496915 | 0.002711 | 1.2699 |
| 6:33050654 | 0.002744 | 1.2231 |
| 6:32665319 | 0.002764 | 1.3396 |
| 6:33050742 | 0.002816 | 1.2226 |
| 6:33050473 | 0.00293  | 1.2215 |
| 6:33050045 | 0.00296  | 1.2217 |
| 6:33050279 | 0.002978 | 1.2209 |
| 6:32421798 | 0.003055 | 1.3971 |
| 6:32666651 | 0.003069 | 1.3354 |
| 6:32666660 | 0.003069 | 1.3354 |
| 6:32654640 | 0.003125 | 1.2608 |
| 6:31208610 | 0.003139 | 1.2055 |
| 6:32670912 | 0.003207 | 1.3347 |

|            |          |        |
|------------|----------|--------|
| 6:31498737 | 0.003312 | 1.2636 |
| 6:31488038 | 0.003366 | 1.2645 |
| 6:32653263 | 0.003406 | 1.3312 |
| 6:33050107 | 0.00347  | 1.2197 |
| 6:33050394 | 0.003548 | 1.2612 |
| 6:33050325 | 0.003631 | 1.2605 |
| 6:33053396 | 0.003729 | 1.2266 |
| 6:30718180 | 0.003815 | 0.7737 |
| 6:32682137 | 0.003886 | 1.3246 |
| 6:32666875 | 0.003945 | 1.4365 |
| 6:33054861 | 0.003945 | 1.2252 |
| 6:33049979 | 0.004033 | 1.2144 |
| 6:31273495 | 0.00407  | 1.3067 |
| 6:32596324 | 0.004153 | 0.7336 |
| 6:32635954 | 0.004628 | 1.3195 |
| 6:32666802 | 0.004683 | 1.4359 |
| 6:33048380 | 0.004716 | 1.293  |
| 6:32665728 | 0.004726 | 1.4345 |
| 6:33041064 | 0.004775 | 1.2954 |
| 6:32666822 | 0.004901 | 1.4339 |
| 6:32592200 | 0.005    | 1.5819 |
| 6:33049983 | 0.005042 | 1.2087 |
| 6:33053942 | 0.005169 | 1.2181 |
| 6:32682019 | 0.005429 | 1.3107 |
| 6:32374262 | 0.005523 | 1.3568 |
| 6:32657916 | 0.005982 | 1.6927 |
| 6:31216262 | 0.006056 | 1.1894 |
| 6:30297529 | 0.006214 | 1.2165 |
| 6:32592209 | 0.00636  | 1.5772 |
| 6:32988695 | 0.006455 | 1.1935 |
| 6:32663936 | 0.006561 | 0.7208 |
| 6:30112623 | 0.006567 | 0.7291 |
| 6:31218984 | 0.006856 | 1.186  |
| 6:32581973 | 0.007155 | 1.3169 |
| 6:32987120 | 0.007302 | 1.1808 |
| 6:31211436 | 0.007477 | 1.1841 |
| 6:32373312 | 0.007483 | 1.3426 |
| 6:32609789 | 0.00766  | 1.816  |
| 6:32987110 | 0.007692 | 1.1796 |
| 6:31273030 | 0.007726 | 1.3351 |
| 6:32657627 | 0.007751 | 1.5496 |

|            |          |        |
|------------|----------|--------|
| 6:31218327 | 0.007776 | 1.1832 |
| 6:32986822 | 0.007789 | 1.1793 |
| 6:30196980 | 0.008052 | 0.7986 |
| 6:31888869 | 0.008088 | 0.6471 |
| 6:32985835 | 0.008445 | 1.1774 |
| 6:32777752 | 0.008543 | 1.37   |
| 6:32659582 | 0.008545 | 1.686  |
| 6:31898285 | 0.008776 | 0.6499 |
| 6:32675470 | 0.009253 | 1.68   |
| 6:30315210 | 0.009459 | 1.2054 |
| 6:32689078 | 0.009812 | 1.22   |
| 6:30080231 | 0.009996 | 0.7411 |
| 6:32373232 | 0.009997 | 1.3275 |
| 6:31890158 | 0.0101   | 0.6551 |
| 6:30302600 | 0.01021  | 1.2037 |
| 6:32105512 | 0.01059  | 0.5716 |
| 6:32672624 | 0.01107  | 1.2881 |
| 6:32102231 | 0.01116  | 0.5501 |
| 6:31154593 | 0.01119  | 0.6706 |
| 6:31124491 | 0.01172  | 0.6724 |
| 6:31220109 | 0.01174  | 1.1712 |
| 6:31124211 | 0.01176  | 0.6725 |
| 6:31012356 | 0.01187  | 0.6818 |
| 6:31510924 | 0.012    | 0.8145 |
| 6:31271141 | 0.01203  | 1.3058 |
| 6:32862475 | 0.01221  | 1.6315 |
| 6:31272209 | 0.01223  | 1.304  |
| 6:32092207 | 0.01238  | 0.5555 |
| 6:31014633 | 0.01248  | 0.6833 |
| 6:32577380 | 0.01266  | 1.3114 |
| 6:31432125 | 0.01312  | 0.8508 |
| 6:31903121 | 0.01328  | 0.6686 |
| 6:31604355 | 0.0134   | 0.5691 |
| 6:32121659 | 0.0134   | 0.5594 |
| 6:31272463 | 0.01376  | 1.2994 |
| 6:32986447 | 0.01426  | 1.4158 |
| 6:31139131 | 0.01433  | 0.6791 |
| 6:31273992 | 0.01456  | 1.2966 |
| 6:31274036 | 0.01456  | 1.2966 |
| 6:31273578 | 0.01468  | 1.2962 |
| 6:32341398 | 0.01494  | 0.7739 |

|            |         |        |
|------------|---------|--------|
| 6:32668105 | 0.01508 | 0.7524 |
| 6:32636280 | 0.0152  | 1.3531 |
| 6:31272157 | 0.01527 | 1.2944 |
| 6:31273366 | 0.01541 | 1.2938 |
| 6:31271157 | 0.01661 | 1.2902 |
| 6:30232514 | 0.01722 | 1.1886 |
| 6:31023840 | 0.01729 | 0.703  |
| 6:32305979 | 0.01786 | 1.4034 |
| 6:32691411 | 0.01839 | 1.1973 |
| 6:31079440 | 0.01847 | 0.6976 |
| 6:32093922 | 0.01865 | 0.6038 |
| 6:31022169 | 0.0187  | 0.7082 |
| 6:32694738 | 0.01907 | 1.1965 |
| 6:29970427 | 0.01922 | 1.3498 |
| 6:32694641 | 0.01952 | 1.1958 |
| 6:31043230 | 0.01956 | 0.7    |
| 6:31102884 | 0.0196  | 1.1628 |
| 6:31060953 | 0.01973 | 0.7003 |
| 6:32984231 | 0.01995 | 1.3905 |
| 6:30171922 | 0.02033 | 0.8095 |
| 6:31540556 | 0.02053 | 1.1782 |
| 6:30736151 | 0.02074 | 0.8121 |
| 6:32694604 | 0.02098 | 1.1928 |
| 6:32316016 | 0.02131 | 1.3929 |
| 6:30185244 | 0.02154 | 0.812  |
| 6:31928306 | 0.02168 | 0.7379 |
| 6:31919956 | 0.02172 | 0.7381 |
| 6:32626302 | 0.02182 | 1.1902 |
| 6:32626272 | 0.02189 | 1.1902 |
| 6:32289390 | 0.02223 | 1.367  |
| 6:31916951 | 0.02233 | 0.739  |
| 6:32626475 | 0.02234 | 1.1895 |
| 6:31349922 | 0.02244 | 1.2532 |
| 6:32995081 | 0.02245 | 1.4047 |
| 6:32320153 | 0.02251 | 1.3895 |
| 6:30234494 | 0.02305 | 1.1793 |
| 6:30235184 | 0.02321 | 1.179  |
| 6:32188383 | 0.02323 | 1.1753 |
| 6:30309508 | 0.0233  | 1.1787 |
| 6:31210462 | 0.02332 | 1.156  |
| 6:31023203 | 0.02334 | 0.717  |

|            |         |        |
|------------|---------|--------|
| 6:32822186 | 0.02343 | 0.675  |
| 6:30731505 | 0.02374 | 0.8161 |
| 6:30228138 | 0.02383 | 1.3303 |
| 6:31430799 | 0.02421 | 0.8564 |
| 6:32694242 | 0.02421 | 1.1892 |
| 6:31351153 | 0.0247  | 0.8485 |
| 6:32603355 | 0.02473 | 0.6581 |
| 6:30270609 | 0.0251  | 1.1772 |
| 6:32992077 | 0.02531 | 1.3244 |
| 6:31919917 | 0.02577 | 0.7448 |
| 6:32237926 | 0.0259  | 1.3548 |
| 6:31910929 | 0.02601 | 0.7451 |
| 6:30240926 | 0.02608 | 1.175  |
| 6:32629802 | 0.02631 | 0.6613 |
| 6:31269173 | 0.02655 | 1.1526 |
| 6:30275124 | 0.02658 | 1.1754 |
| 6:31022206 | 0.02668 | 0.8531 |
| 6:31834197 | 0.02669 | 1.4279 |
| 6:32451570 | 0.02671 | 0.8456 |
| 6:30259657 | 0.02682 | 1.1743 |
| 6:32694710 | 0.027   | 1.1861 |
| 6:30264307 | 0.02701 | 1.1751 |
| 6:31208340 | 0.02703 | 1.1515 |
| 6:32635974 | 0.02718 | 1.346  |
| 6:30316739 | 0.02726 | 1.1737 |
| 6:31318144 | 0.0273  | 0.8295 |
| 6:32995863 | 0.02753 | 1.3726 |
| 6:31910162 | 0.02757 | 0.7473 |
| 6:32689414 | 0.02779 | 1.1834 |
| 6:30853796 | 0.02781 | 1.1671 |
| 6:32698457 | 0.02788 | 1.1826 |
| 6:32652196 | 0.02798 | 1.2498 |
| 6:32636443 | 0.02803 | 1.3435 |
| 6:31907147 | 0.02848 | 0.7498 |
| 6:30230128 | 0.02854 | 1.1721 |
| 6:30293789 | 0.02856 | 1.3692 |
| 6:30228938 | 0.02861 | 1.1721 |
| 6:30764420 | 0.02861 | 0.8221 |
| 6:30229922 | 0.02915 | 1.1714 |
| 6:30758555 | 0.02947 | 0.8236 |
| 6:31513402 | 0.02982 | 0.8192 |

|            |         |        |
|------------|---------|--------|
| 6:30231108 | 0.02986 | 1.1707 |
| 6:32797309 | 0.02996 | 1.3251 |
| 6:32097891 | 0.02997 | 0.6395 |
| 6:32410576 | 0.03003 | 1.2451 |
| 6:31210216 | 0.03079 | 1.1477 |
| 6:30815035 | 0.03099 | 0.8377 |
| 6:32691919 | 0.03101 | 1.1792 |
| 6:32188603 | 0.03104 | 1.1699 |
| 6:32688804 | 0.03123 | 1.1797 |
| 6:32259527 | 0.03168 | 1.3407 |
| 6:32191457 | 0.03214 | 0.8317 |
| 6:30229830 | 0.03266 | 1.1678 |
| 6:30893941 | 0.03289 | 0.8379 |
| 6:30270080 | 0.03301 | 1.1683 |
| 6:32216147 | 0.03321 | 1.4562 |
| 6:32690276 | 0.03352 | 1.1765 |
| 6:31907168 | 0.0341  | 0.7571 |
| 6:31190977 | 0.03413 | 0.6208 |
| 6:30293186 | 0.03467 | 1.3532 |
| 6:32688728 | 0.03489 | 1.1753 |
| 6:32688730 | 0.03489 | 1.1753 |
| 6:30829522 | 0.03507 | 0.8407 |
| 6:32170433 | 0.03512 | 1.1629 |
| 6:31905328 | 0.03514 | 0.7583 |
| 6:30229990 | 0.03539 | 1.165  |
| 6:30899524 | 0.03561 | 0.8408 |
| 6:30862423 | 0.03627 | 0.8431 |
| 6:32693200 | 0.03649 | 1.1717 |
| 6:30246212 | 0.03671 | 1.3531 |
| 6:32706334 | 0.03738 | 1.1736 |
| 6:32697739 | 0.03749 | 1.1726 |
| 6:32685953 | 0.03786 | 1.1716 |
| 6:31198801 | 0.038   | 0.5674 |
| 6:30011451 | 0.03811 | 0.7391 |
| 6:31221396 | 0.03838 | 1.1625 |
| 6:31189543 | 0.03839 | 0.6227 |
| 6:31189798 | 0.03856 | 0.6227 |
| 6:32697801 | 0.03869 | 1.1714 |
| 6:31327452 | 0.03892 | 1.5476 |
| 6:31204491 | 0.039   | 0.5679 |
| 6:32189032 | 0.0391  | 1.162  |

|            |         |        |
|------------|---------|--------|
| 6:32692919 | 0.03924 | 1.1711 |
| 6:32688617 | 0.0395  | 1.17   |
| 6:29837188 | 0.03961 | 1.1622 |
| 6:30900150 | 0.03971 | 0.8442 |
| 6:31328528 | 0.03975 | 1.5448 |
| 6:32687689 | 0.03998 | 1.1696 |
| 6:31002101 | 0.04004 | 0.7596 |
| 6:31189006 | 0.04044 | 0.6235 |
| 6:32602518 | 0.04105 | 0.6655 |
| 6:29789999 | 0.04117 | 1.1664 |
| 6:32697907 | 0.04152 | 1.1683 |
| 6:31005432 | 0.04153 | 0.7677 |
| 6:32688055 | 0.04154 | 1.1683 |
| 6:31186904 | 0.04183 | 0.624  |
| 6:32981682 | 0.04208 | 1.1342 |
| 6:32688343 | 0.04224 | 1.1677 |
| 6:32698047 | 0.04296 | 1.167  |
| 6:32697943 | 0.043   | 1.167  |
| 6:32693182 | 0.04338 | 1.1667 |
| 6:32383138 | 0.04354 | 1.4317 |
| 6:32070838 | 0.04376 | 0.6489 |
| 6:31323027 | 0.0438  | 1.5448 |
| 6:31610529 | 0.04393 | 0.8763 |
| 6:32692509 | 0.04431 | 1.1657 |
| 6:32698417 | 0.04433 | 1.1657 |
| 6:32698421 | 0.04433 | 1.1657 |
| 6:32690027 | 0.04435 | 1.1657 |
| 6:32692711 | 0.04435 | 1.1657 |
| 6:32693566 | 0.04438 | 1.1657 |
| 6:32695022 | 0.04438 | 1.1657 |
| 6:32695082 | 0.04438 | 1.1657 |
| 6:32692023 | 0.04449 | 1.1657 |
| 6:31610686 | 0.04454 | 0.8766 |
| 6:32698322 | 0.04469 | 1.1653 |
| 6:32702930 | 0.04516 | 1.1651 |
| 6:32688302 | 0.04569 | 1.1636 |
| 6:32692617 | 0.04574 | 1.1645 |
| 6:31844684 | 0.04583 | 0.7516 |
| 6:32699080 | 0.04632 | 1.164  |
| 6:32626730 | 0.04664 | 0.7071 |
| 6:31778077 | 0.04674 | 1.3758 |

|            |         |        |
|------------|---------|--------|
| 6:32687588 | 0.04713 | 1.163  |
| 6:32688798 | 0.04721 | 1.1631 |
| 6:31786730 | 0.04739 | 0.7722 |
| 6:29753868 | 0.0475  | 0.7513 |
| 6:32650233 | 0.04885 | 1.2389 |
| 6:32700700 | 0.04888 | 1.1623 |
| 6:31370367 | 0.04914 | 1.2585 |
| 6:32321554 | 0.04953 | 1.4314 |
| 6:32653070 | 0.05015 | 1.2386 |
| 6:31355603 | 0.05032 | 1.5009 |
| 6:32688273 | 0.05032 | 1.1626 |
| 6:31345815 | 0.0508  | 1.4995 |
| 6:31303236 | 0.05141 | 1.1362 |
| 6:32270731 | 0.05152 | 1.4232 |
| 6:31268965 | 0.05165 | 1.2711 |
| 6:32984451 | 0.05216 | 0.8848 |
| 6:31575276 | 0.05249 | 0.7431 |
| 6:30232374 | 0.05251 | 1.3109 |
| 6:31230701 | 0.0526  | 1.4543 |
| 6:31331257 | 0.05355 | 0.8776 |
| 6:31520426 | 0.05434 | 0.8039 |
| 6:32590501 | 0.05473 | 1.3176 |
| 6:33047898 | 0.05532 | 1.2406 |
| 6:32716022 | 0.0556  | 1.1581 |
| 6:32605274 | 0.05574 | 0.654  |
| 6:31220567 | 0.05611 | 1.1488 |
| 6:32706480 | 0.05625 | 1.1581 |
| 6:31272321 | 0.05626 | 1.2541 |
| 6:32690713 | 0.05627 | 1.1566 |
| 6:31465030 | 0.05708 | 0.7902 |
| 6:32979609 | 0.05772 | 1.1252 |
| 6:31430359 | 0.05786 | 1.2303 |
| 6:31352348 | 0.05787 | 0.5936 |
| 6:31170914 | 0.05792 | 0.8828 |
| 6:32704982 | 0.05815 | 1.1568 |
| 6:32315722 | 0.05844 | 1.4087 |
| 6:30760181 | 0.05882 | 0.885  |
| 6:32980606 | 0.05889 | 1.1245 |
| 6:32692122 | 0.05891 | 1.1561 |
| 6:31176335 | 0.05918 | 0.8814 |
| 6:29789190 | 0.05922 | 1.1527 |



|            |         |        |
|------------|---------|--------|
| 6:32592219 | 0.05934 | 1.3294 |
| 6:32981647 | 0.05952 | 1.1244 |
| 6:31274380 | 0.06012 | 0.8144 |
| 6:32979746 | 0.06018 | 1.1238 |
| 6:32302163 | 0.06025 | 1.4056 |
| 6:31607674 | 0.06081 | 0.7257 |
| 6:32706234 | 0.06169 | 1.1542 |
| 6:31651194 | 0.06174 | 1.3309 |
| 6:31347458 | 0.06176 | 0.5951 |
| 6:32989477 | 0.06185 | 1.3443 |
| 6:32713188 | 0.06193 | 1.1542 |
| 6:29786487 | 0.06202 | 1.151  |
| 6:31334477 | 0.06266 | 0.5954 |
| 6:31340449 | 0.06294 | 1.4663 |
| 6:31347213 | 0.06305 | 0.5957 |
| 6:32609126 | 0.06372 | 0.6751 |
| 6:29842172 | 0.06375 | 1.1523 |
| 6:31371355 | 0.06393 | 1.4665 |
| 6:29794049 | 0.06415 | 1.1499 |
| 6:31333499 | 0.06415 | 0.882  |
| 6:30075864 | 0.0645  | 1.1241 |
| 6:31209510 | 0.06462 | 1.1247 |
| 6:30855907 | 0.06499 | 0.8856 |
| 6:32335657 | 0.065   | 1.397  |
| 6:31340767 | 0.06648 | 0.5971 |
| 6:31338768 | 0.06709 | 0.602  |
| 6:32989468 | 0.06786 | 1.3354 |
| 6:32990675 | 0.06786 | 1.3354 |
| 6:32990811 | 0.06786 | 1.3354 |
| 6:32980031 | 0.06822 | 1.3489 |
| 6:30760698 | 0.0685  | 0.8891 |
| 6:31354387 | 0.06865 | 0.5974 |
| 6:31374579 | 0.06924 | 1.2244 |
| 6:31379168 | 0.06924 | 0.707  |
| 6:32079567 | 0.06962 | 0.7569 |
| 6:30438226 | 0.06963 | 0.8672 |
| 6:30448668 | 0.06992 | 0.868  |
| 6:32982921 | 0.07031 | 1.1191 |
| 6:32698285 | 0.07037 | 1.149  |
| 6:32982911 | 0.07042 | 1.1191 |
| 6:31273554 | 0.07084 | 1.2588 |

|            |         |        |
|------------|---------|--------|
| 6:31130593 | 0.07199 | 1.1276 |
| 6:31016848 | 0.07351 | 0.7116 |
| 6:31347816 | 0.07364 | 1.1301 |
| 6:32741868 | 0.07569 | 1.1615 |
| 6:31192998 | 0.07583 | 1.1405 |
| 6:31234541 | 0.07587 | 1.1415 |
| 6:31392906 | 0.07625 | 1.2315 |
| 6:31337633 | 0.07629 | 0.6004 |
| 6:32407310 | 0.07644 | 0.8705 |
| 6:32996217 | 0.07657 | 1.1172 |
| 6:31237703 | 0.07675 | 1.1304 |
| 6:30764241 | 0.07713 | 0.8565 |
| 6:32449411 | 0.07719 | 0.8784 |
| 6:32984011 | 0.07781 | 1.1159 |
| 6:31206206 | 0.07831 | 1.1214 |
| 6:31243347 | 0.07875 | 1.1484 |
| 6:31669295 | 0.07952 | 0.7441 |
| 6:31238822 | 0.07954 | 1.3696 |
| 6:31240884 | 0.07984 | 1.3622 |
| 6:31592064 | 0.08    | 0.7442 |
| 6:31014305 | 0.08004 | 0.7126 |
| 6:32985413 | 0.08013 | 1.1149 |
| 6:29796640 | 0.0803  | 1.1407 |
| 6:31583224 | 0.08034 | 0.7445 |
| 6:30059616 | 0.08038 | 1.1577 |
| 6:29944158 | 0.08064 | 0.8036 |
| 6:31373445 | 0.08064 | 0.6887 |
| 6:31356960 | 0.08115 | 0.582  |
| 6:31211050 | 0.0815  | 1.1387 |
| 6:31233845 | 0.082   | 1.1382 |
| 6:31867253 | 0.08246 | 1.3225 |
| 6:31234381 | 0.08249 | 1.1232 |
| 6:31433558 | 0.08273 | 1.1482 |
| 6:32986677 | 0.08339 | 1.1136 |
| 6:31350505 | 0.08353 | 0.572  |
| 6:31628216 | 0.08365 | 0.7472 |
| 6:31301658 | 0.08421 | 1.2539 |
| 6:31298515 | 0.08439 | 1.2668 |
| 6:30031345 | 0.08464 | 0.8874 |
| 6:31326072 | 0.08526 | 0.6695 |
| 6:32576036 | 0.08569 | 0.8198 |

|            |         |        |
|------------|---------|--------|
| 6:31546980 | 0.08657 | 1.3823 |
| 6:33037560 | 0.08697 | 1.1736 |
| 6:32983714 | 0.08735 | 1.1121 |
| 6:32026257 | 0.08736 | 1.2127 |
| 6:31243170 | 0.0875  | 0.8966 |
| 6:29838099 | 0.0876  | 1.1313 |
| 6:32163799 | 0.08817 | 1.2707 |
| 6:32451526 | 0.08838 | 0.8825 |
| 6:30181638 | 0.08878 | 1.2492 |
| 6:30800577 | 0.08927 | 0.8989 |
| 6:30172233 | 0.08991 | 1.2479 |
| 6:33025740 | 0.09084 | 1.1663 |
| 6:31614102 | 0.09085 | 1.149  |
| 6:30209953 | 0.09105 | 1.2472 |
| 6:31437305 | 0.09118 | 0.7805 |
| 6:31585219 | 0.09179 | 0.893  |
| 6:31445476 | 0.0922  | 0.7005 |
| 6:30077229 | 0.09246 | 1.1245 |
| 6:30193874 | 0.09249 | 1.2458 |
| 6:32998121 | 0.0927  | 1.1123 |
| 6:31431780 | 0.09324 | 0.6938 |
| 6:31577825 | 0.09352 | 1.1698 |
| 6:30313268 | 0.09392 | 0.8606 |
| 6:30151370 | 0.09451 | 1.2441 |
| 6:32161324 | 0.09502 | 1.2649 |
| 6:31445564 | 0.09537 | 0.7001 |
| 6:30314116 | 0.09655 | 0.8617 |
| 6:32978178 | 0.0969  | 1.1308 |
| 6:32427789 | 0.09697 | 1.1365 |
| 6:31240636 | 0.09793 | 1.3356 |
| 6:32586831 | 0.09846 | 0.8381 |
| 6:31472459 | 0.09863 | 0.777  |
| 6:32789807 | 0.09896 | 1.2971 |
| 6:33026388 | 0.09898 | 1.1617 |
| 6:32789168 | 0.1008  | 1.2985 |
| 6:32367795 | 0.101   | 1.1276 |
| 6:31272392 | 0.1013  | 1.38   |
| 6:31518354 | 0.1016  | 0.893  |
| 6:31347070 | 0.1026  | 1.1434 |
| 6:31176602 | 0.1033  | 0.7926 |
| 6:32789197 | 0.1033  | 1.2988 |

|            |        |        |
|------------|--------|--------|
| 6:32593127 | 0.1035 | 0.8494 |
| 6:32050067 | 0.1036 | 1.1185 |
| 6:31235610 | 0.1039 | 1.1284 |
| 6:31274555 | 0.1057 | 0.8556 |
| 6:31081251 | 0.1058 | 0.8703 |
| 6:29836577 | 0.1059 | 1.1229 |
| 6:33032975 | 0.1066 | 1.1935 |
| 6:31379115 | 0.1067 | 1.1251 |
| 6:31446366 | 0.1067 | 0.794  |
| 6:29835073 | 0.1068 | 1.1221 |
| 6:31186534 | 0.1068 | 0.7849 |
| 6:31482203 | 0.1071 | 0.7752 |
| 6:31561747 | 0.1074 | 0.654  |
| 6:33037557 | 0.1074 | 1.1583 |
| 6:29840648 | 0.1075 | 1.1223 |
| 6:30758861 | 0.1076 | 0.9015 |
| 6:31218038 | 0.1077 | 0.5813 |
| 6:29839816 | 0.1083 | 1.1217 |
| 6:30028913 | 0.1083 | 0.8035 |
| 6:32311459 | 0.1083 | 0.8895 |
| 6:30758466 | 0.1085 | 0.9015 |
| 6:30062058 | 0.1086 | 0.8027 |
| 6:30162809 | 0.1087 | 0.8483 |
| 6:31583155 | 0.1088 | 0.8983 |
| 6:30907266 | 0.1092 | 1.1607 |
| 6:29955025 | 0.1099 | 0.8042 |
| 6:29973925 | 0.1099 | 1.1844 |
| 6:29957802 | 0.1102 | 0.8045 |
| 6:29993086 | 0.1108 | 0.8057 |
| 6:29849619 | 0.1109 | 0.8562 |
| 6:31043249 | 0.1111 | 0.6733 |
| 6:31021504 | 0.1116 | 1.1085 |
| 6:30025210 | 0.112  | 0.8052 |
| 6:29833948 | 0.1123 | 0.8575 |
| 6:29963622 | 0.1132 | 0.806  |
| 6:32743298 | 0.1134 | 1.1398 |
| 6:31232147 | 0.114  | 1.1245 |
| 6:32071893 | 0.1147 | 1.1872 |
| 6:29992286 | 0.1153 | 0.8061 |
| 6:31272892 | 0.1157 | 1.312  |
| 6:29956953 | 0.1158 | 0.8071 |

|            |        |        |
|------------|--------|--------|
| 6:29962268 | 0.1158 | 0.807  |
| 6:31269701 | 0.1158 | 1.39   |
| 6:32755087 | 0.1162 | 0.8191 |
| 6:29945508 | 0.1163 | 0.8074 |
| 6:31036706 | 0.1163 | 0.7865 |
| 6:32409530 | 0.1166 | 1.183  |
| 6:30036083 | 0.1173 | 0.807  |
| 6:30093137 | 0.1177 | 0.8877 |
| 6:31480398 | 0.1177 | 0.7755 |
| 6:31177458 | 0.1184 | 0.795  |
| 6:31254604 | 0.1184 | 1.3086 |
| 6:31265759 | 0.1184 | 1.3085 |
| 6:30152367 | 0.1191 | 0.8528 |
| 6:32447058 | 0.1191 | 1.1371 |
| 6:30022425 | 0.1192 | 0.8085 |
| 6:29969040 | 0.1195 | 0.8089 |
| 6:29980073 | 0.1195 | 0.809  |
| 6:32635949 | 0.1195 | 1.1927 |
| 6:29945368 | 0.1204 | 0.8093 |
| 6:30057675 | 0.1205 | 0.8091 |
| 6:31595487 | 0.1205 | 0.901  |
| 6:32713267 | 0.1206 | 1.1841 |
| 6:31269323 | 0.1208 | 1.3061 |
| 6:31481299 | 0.1209 | 0.7758 |
| 6:30042057 | 0.1214 | 1.2106 |
| 6:31273703 | 0.1214 | 1.3064 |
| 6:29942866 | 0.1216 | 0.8098 |
| 6:30445476 | 0.1219 | 0.8202 |
| 6:30413907 | 0.122  | 0.819  |
| 6:30005043 | 0.1221 | 0.8101 |
| 6:29835834 | 0.1222 | 1.1169 |
| 6:32755034 | 0.1222 | 0.8216 |
| 6:30030057 | 0.1224 | 0.8102 |
| 6:30030135 | 0.1224 | 0.8102 |
| 6:29985325 | 0.1227 | 0.8103 |
| 6:30033690 | 0.1227 | 0.8103 |
| 6:29988740 | 0.1228 | 0.8103 |
| 6:29987738 | 0.1232 | 0.8106 |
| 6:32026808 | 0.1241 | 1.1975 |
| 6:31335454 | 0.1243 | 0.8984 |
| 6:30036269 | 0.1247 | 0.8108 |

|            |        |        |
|------------|--------|--------|
| 6:32188099 | 0.1247 | 1.1237 |
| 6:29945741 | 0.125  | 0.8114 |
| 6:29966175 | 0.1253 | 0.8115 |
| 6:29970685 | 0.1253 | 0.8115 |
| 6:31604044 | 0.1254 | 1.1622 |
| 6:29979125 | 0.1256 | 0.8116 |
| 6:29967529 | 0.1262 | 0.8119 |
| 6:30040084 | 0.1264 | 0.7528 |
| 6:31070664 | 0.1265 | 0.6782 |
| 6:31346902 | 0.1265 | 0.7763 |
| 6:31346822 | 0.127  | 0.7763 |
| 6:31034110 | 0.1271 | 0.8114 |
| 6:30044914 | 0.1273 | 0.812  |
| 6:31589735 | 0.1274 | 1.3225 |
| 6:29980445 | 0.1276 | 0.8125 |
| 6:30046752 | 0.1278 | 0.8122 |
| 6:29988439 | 0.1286 | 0.8129 |
| 6:33042880 | 0.1286 | 1.1498 |
| 6:31330619 | 0.1287 | 1.127  |
| 6:31335647 | 0.1288 | 0.8995 |
| 6:32693506 | 0.129  | 0.7854 |
| 6:31258096 | 0.1292 | 1.299  |
| 6:32788511 | 0.1296 | 1.2346 |
| 6:32915823 | 0.1306 | 0.7607 |
| 6:30039484 | 0.1308 | 0.8133 |
| 6:32429894 | 0.1309 | 1.1326 |
| 6:31071645 | 0.131  | 0.6215 |
| 6:29829566 | 0.1312 | 1.2242 |
| 6:29945620 | 0.1312 | 1.1746 |
| 6:29967999 | 0.1312 | 0.8139 |
| 6:31262869 | 0.1314 | 1.2945 |
| 6:30002881 | 0.1315 | 0.9004 |
| 6:29975587 | 0.1316 | 0.814  |
| 6:31578772 | 0.1316 | 0.9027 |
| 6:32698988 | 0.1319 | 1.1047 |
| 6:29942191 | 0.1323 | 1.1568 |
| 6:30830292 | 0.133  | 0.6834 |
| 6:30061293 | 0.1334 | 0.8143 |
| 6:32668667 | 0.1336 | 1.1521 |
| 6:29969973 | 0.1337 | 0.8152 |
| 6:30041509 | 0.1337 | 1.2032 |

|            |        |        |
|------------|--------|--------|
| 6:32754781 | 0.1337 | 0.8275 |
| 6:31233353 | 0.1339 | 1.1175 |
| 6:31085770 | 0.1341 | 0.9106 |
| 6:31192766 | 0.1341 | 0.7364 |
| 6:32435123 | 0.1342 | 1.125  |
| 6:33034596 | 0.1345 | 0.8622 |
| 6:31238793 | 0.135  | 1.3049 |
| 6:29991538 | 0.1355 | 0.8158 |
| 6:30444357 | 0.1356 | 1.1019 |
| 6:33040654 | 0.1356 | 1.1472 |
| 6:31234114 | 0.1358 | 0.8935 |
| 6:31258687 | 0.1363 | 1.2848 |
| 6:32177900 | 0.1368 | 1.1197 |
| 6:32297901 | 0.137  | 1.1683 |
| 6:31252925 | 0.1372 | 0.8674 |
| 6:32723614 | 0.1373 | 0.7613 |
| 6:33039652 | 0.1373 | 1.1463 |
| 6:29958674 | 0.1374 | 0.8153 |
| 6:30271334 | 0.1374 | 0.8755 |
| 6:31062133 | 0.1381 | 0.9105 |
| 6:32074804 | 0.1384 | 1.1751 |
| 6:31176921 | 0.1387 | 0.7983 |
| 6:31230800 | 0.1388 | 0.8943 |
| 6:32405144 | 0.1392 | 0.7455 |
| 6:29829655 | 0.1401 | 0.7653 |
| 6:31546789 | 0.1405 | 0.7391 |
| 6:32297906 | 0.1408 | 1.1667 |
| 6:31347643 | 0.1412 | 0.808  |
| 6:29930706 | 0.1413 | 0.7269 |
| 6:29831532 | 0.1423 | 0.7665 |
| 6:32752685 | 0.1423 | 0.8318 |
| 6:32595682 | 0.1429 | 1.4311 |
| 6:30825220 | 0.1432 | 0.6857 |
| 6:33038134 | 0.1432 | 1.1449 |
| 6:31925697 | 0.1433 | 1.2536 |
| 6:33038982 | 0.1438 | 1.1444 |
| 6:31348580 | 0.1439 | 1.0991 |
| 6:30055933 | 0.1441 | 0.8158 |
| 6:31233510 | 0.1441 | 0.8958 |
| 6:32835258 | 0.1441 | 0.8139 |
| 6:30142690 | 0.1451 | 0.8618 |

|            |        |        |
|------------|--------|--------|
| 6:32732890 | 0.1451 | 0.7616 |
| 6:30046376 | 0.1452 | 1.1671 |
| 6:30362961 | 0.1452 | 1.1317 |
| 6:32298942 | 0.1454 | 1.1645 |
| 6:31101674 | 0.1465 | 0.8854 |
| 6:30362999 | 0.1484 | 1.1918 |
| 6:31075115 | 0.1486 | 0.9112 |
| 6:31348879 | 0.149  | 1.0983 |
| 6:32753654 | 0.149  | 0.8335 |
| 6:29966620 | 0.1492 | 0.8205 |
| 6:32569667 | 0.15   | 0.8492 |
| 6:30339602 | 0.151  | 1.0964 |
| 6:31249977 | 0.1514 | 1.1001 |
| 6:32718620 | 0.1519 | 0.7177 |
| 6:32784676 | 0.1526 | 1.2317 |
| 6:32792693 | 0.1532 | 1.336  |
| 6:32338400 | 0.1535 | 1.1616 |
| 6:32741002 | 0.1536 | 0.8361 |
| 6:32663919 | 0.154  | 0.7894 |
| 6:32208324 | 0.1542 | 1.1136 |
| 6:31643522 | 0.1545 | 0.7951 |
| 6:32791313 | 0.1545 | 1.34   |
| 6:32743138 | 0.1548 | 0.8366 |
| 6:32791831 | 0.1548 | 1.3398 |
| 6:29968764 | 0.1553 | 0.8251 |
| 6:30026350 | 0.1559 | 0.8213 |
| 6:32793423 | 0.156  | 1.3386 |
| 6:32793957 | 0.156  | 1.3386 |
| 6:32793958 | 0.156  | 1.3386 |
| 6:32793970 | 0.156  | 1.3386 |
| 6:32794119 | 0.156  | 1.3386 |
| 6:32102680 | 0.1563 | 1.1673 |
| 6:32430368 | 0.1566 | 1.2099 |
| 6:31265565 | 0.1569 | 1.2794 |
| 6:31915614 | 0.1569 | 0.755  |
| 6:30738042 | 0.1571 | 1.4268 |
| 6:32752649 | 0.1575 | 0.8377 |
| 6:31131707 | 0.158  | 1.7395 |
| 6:32754430 | 0.1584 | 0.8378 |
| 6:32626179 | 0.1585 | 0.8297 |
| 6:32752150 | 0.1586 | 0.8379 |



|            |        |        |
|------------|--------|--------|
| 6:32752647 | 0.1586 | 0.8379 |
| 6:32754949 | 0.1586 | 0.8379 |
| 6:30872274 | 0.1588 | 0.6884 |
| 6:30025503 | 0.1593 | 0.9078 |
| 6:31075375 | 0.1594 | 0.9116 |
| 6:31111174 | 0.1594 | 1.7383 |
| 6:33031689 | 0.1598 | 1.1378 |
| 6:31691657 | 0.1599 | 1.199  |
| 6:31141127 | 0.1601 | 1.6176 |
| 6:31583827 | 0.1604 | 0.909  |
| 6:32198948 | 0.1605 | 0.8975 |
| 6:32756857 | 0.1605 | 0.8386 |
| 6:31256050 | 0.1606 | 1.2737 |
| 6:31228634 | 0.1609 | 0.9003 |
| 6:31073903 | 0.161  | 0.9121 |
| 6:32748021 | 0.161  | 0.8388 |
| 6:32751370 | 0.161  | 0.8388 |
| 6:32751555 | 0.161  | 0.8388 |
| 6:32752504 | 0.161  | 0.8388 |
| 6:32752641 | 0.161  | 0.8388 |
| 6:32754516 | 0.161  | 0.8388 |
| 6:32755275 | 0.161  | 0.8388 |
| 6:32758677 | 0.161  | 0.8388 |
| 6:32748690 | 0.1616 | 0.839  |
| 6:32752436 | 0.1616 | 0.839  |
| 6:31434198 | 0.1621 | 1.1189 |
| 6:31618723 | 0.1625 | 0.7986 |
| 6:31941557 | 0.1626 | 0.8618 |
| 6:31077938 | 0.1629 | 0.912  |
| 6:31529883 | 0.1634 | 0.91   |
| 6:32316240 | 0.1635 | 1.1582 |
| 6:32983765 | 0.1635 | 1.1912 |
| 6:31536224 | 0.1636 | 0.91   |
| 6:32085278 | 0.1641 | 0.7422 |
| 6:32626037 | 0.1643 | 0.8318 |
| 6:32637696 | 0.1648 | 1.1543 |
| 6:31445771 | 0.1649 | 0.7514 |
| 6:30362995 | 0.165  | 1.1236 |
| 6:31618761 | 0.165  | 1.144  |
| 6:32200754 | 0.1652 | 0.8985 |
| 6:31531215 | 0.1655 | 0.9104 |

|            |        |        |
|------------|--------|--------|
| 6:30888617 | 0.1661 | 0.6392 |
| 6:32411646 | 0.1662 | 1.1146 |
| 6:32981937 | 0.1664 | 1.2731 |
| 6:30770732 | 0.1666 | 0.8833 |
| 6:30118582 | 0.1667 | 0.889  |
| 6:31107031 | 0.1675 | 1.7303 |
| 6:31112354 | 0.1675 | 1.7303 |
| 6:31336418 | 0.1675 | 1.1149 |
| 6:31106516 | 0.1677 | 1.7203 |
| 6:32325292 | 0.1678 | 1.1597 |
| 6:31601012 | 0.1679 | 1.101  |
| 6:31080586 | 0.1685 | 0.694  |
| 6:32669373 | 0.1685 | 0.7452 |
| 6:30899577 | 0.1699 | 0.6402 |
| 6:32948426 | 0.1699 | 0.8406 |
| 6:31589676 | 0.17   | 0.911  |
| 6:31593476 | 0.1701 | 0.9108 |
| 6:32792640 | 0.1701 | 1.3482 |
| 6:31060115 | 0.1702 | 0.909  |
| 6:31336568 | 0.1702 | 1.1143 |
| 6:32413150 | 0.1712 | 1.1132 |
| 6:31059900 | 0.1718 | 0.9091 |
| 6:31343632 | 0.1728 | 1.1136 |
| 6:31060162 | 0.1729 | 0.9092 |
| 6:31061439 | 0.1729 | 0.9092 |
| 6:32823567 | 0.1738 | 0.8347 |
| 6:30046682 | 0.1742 | 1.1555 |
| 6:31235869 | 0.1744 | 0.9026 |
| 6:32380892 | 0.1746 | 1.1235 |
| 6:32725193 | 0.1751 | 1.0944 |
| 6:31058627 | 0.1753 | 0.9081 |
| 6:31351887 | 0.1753 | 1.0992 |
| 6:31313556 | 0.1761 | 0.7903 |
| 6:32581491 | 0.1761 | 0.8582 |
| 6:29932433 | 0.1766 | 0.8308 |
| 6:29997312 | 0.1768 | 0.8284 |
| 6:32664093 | 0.1768 | 0.7908 |
| 6:29937104 | 0.178  | 0.7611 |
| 6:31062363 | 0.1782 | 0.9105 |
| 6:30773349 | 0.1783 | 0.8878 |
| 6:31480272 | 0.1784 | 0.7092 |

|            |        |        |
|------------|--------|--------|
| 6:32629847 | 0.1784 | 0.8013 |
| 6:31059386 | 0.1785 | 0.9096 |
| 6:31238259 | 0.1786 | 1.093  |
| 6:32590916 | 0.1787 | 0.9061 |
| 6:30069137 | 0.179  | 1.133  |
| 6:31438390 | 0.179  | 1.0991 |
| 6:29762068 | 0.1795 | 0.9095 |
| 6:32667946 | 0.1796 | 0.8059 |
| 6:30348090 | 0.1798 | 1.1207 |
| 6:32590953 | 0.1799 | 0.9064 |
| 6:32323745 | 0.1803 | 1.183  |
| 6:32590899 | 0.1803 | 0.9064 |
| 6:32792659 | 0.1803 | 0.8464 |
| 6:32740411 | 0.1804 | 0.8975 |
| 6:32050544 | 0.1805 | 1.1565 |
| 6:31379752 | 0.1818 | 1.2084 |
| 6:32797488 | 0.1818 | 1.1061 |
| 6:31095270 | 0.1819 | 0.8968 |
| 6:32657452 | 0.182  | 0.7911 |
| 6:30067681 | 0.1827 | 1.1406 |
| 6:30128442 | 0.1828 | 1.1874 |
| 6:30726748 | 0.1834 | 1.0872 |
| 6:31139452 | 0.1842 | 1.0904 |
| 6:31678774 | 0.1844 | 0.7242 |
| 6:31241032 | 0.1848 | 1.1442 |
| 6:30743241 | 0.1852 | 1.0865 |
| 6:31179014 | 0.1854 | 1.0993 |
| 6:32921774 | 0.1868 | 1.1302 |
| 6:32590529 | 0.1874 | 0.7571 |
| 6:32981848 | 0.1875 | 1.2788 |
| 6:30769837 | 0.1879 | 0.8888 |
| 6:30327753 | 0.188  | 1.1188 |
| 6:31332239 | 0.188  | 0.6696 |
| 6:30035485 | 0.1883 | 0.7977 |
| 6:32659077 | 0.1891 | 1.1315 |
| 6:29768123 | 0.1892 | 0.8381 |
| 6:32760318 | 0.1892 | 0.849  |
| 6:32693711 | 0.1894 | 1.1071 |
| 6:32718602 | 0.1896 | 0.7207 |
| 6:31707730 | 0.1903 | 1.1388 |
| 6:29928838 | 0.1904 | 0.7422 |

|            |        |        |
|------------|--------|--------|
| 6:31437318 | 0.1905 | 1.0971 |
| 6:31068420 | 0.1906 | 0.9135 |
| 6:29834449 | 0.1911 | 1.1044 |
| 6:31437158 | 0.1911 | 1.0972 |
| 6:30331027 | 0.1913 | 1.1175 |
| 6:32295419 | 0.1914 | 1.3367 |
| 6:32430508 | 0.1914 | 1.1085 |
| 6:32830568 | 0.1914 | 0.8623 |
| 6:32927969 | 0.1916 | 1.1284 |
| 6:32763405 | 0.1917 | 0.8499 |
| 6:32761690 | 0.1923 | 0.8501 |
| 6:29935891 | 0.1924 | 0.742  |
| 6:31221698 | 0.1924 | 0.9076 |
| 6:31449778 | 0.1925 | 1.1006 |
| 6:32761398 | 0.1927 | 0.8502 |
| 6:31078615 | 0.1933 | 1.0872 |
| 6:32335516 | 0.1936 | 1.146  |
| 6:32176782 | 0.1944 | 1.1141 |
| 6:30571471 | 0.1946 | 1.0872 |
| 6:31437617 | 0.1947 | 0.8257 |
| 6:29773509 | 0.1953 | 0.9117 |
| 6:30955738 | 0.1953 | 0.7771 |
| 6:31437506 | 0.1953 | 0.826  |
| 6:29981427 | 0.1958 | 1.1486 |
| 6:30797083 | 0.1962 | 0.8929 |
| 6:32397813 | 0.1963 | 1.1457 |
| 6:32398525 | 0.1965 | 1.1458 |
| 6:31272030 | 0.197  | 0.6588 |
| 6:31178943 | 0.1974 | 1.0965 |
| 6:31347057 | 0.1974 | 1.095  |
| 6:29743563 | 0.1976 | 0.9121 |
| 6:32944987 | 0.1978 | 1.1267 |
| 6:32310396 | 0.1979 | 1.1623 |
| 6:30034184 | 0.1985 | 0.8018 |
| 6:32976759 | 0.199  | 0.9228 |
| 6:31544642 | 0.1993 | 0.8427 |
| 6:31265375 | 0.1995 | 1.3027 |
| 6:29736163 | 0.1998 | 0.8572 |
| 6:32802203 | 0.1999 | 0.922  |
| 6:29936408 | 0.2001 | 0.7373 |
| 6:31182536 | 0.2004 | 1.0958 |

|            |        |        |
|------------|--------|--------|
| 6:32702449 | 0.2004 | 0.9003 |
| 6:31434111 | 0.2006 | 1.111  |
| 6:31340630 | 0.2011 | 1.1046 |
| 6:29913969 | 0.2014 | 0.8872 |
| 6:32597022 | 0.2017 | 1.1198 |
| 6:30055179 | 0.2018 | 0.8007 |
| 6:31177034 | 0.2024 | 1.0954 |
| 6:30296071 | 0.2027 | 0.9193 |
| 6:33025044 | 0.2027 | 1.1433 |
| 6:31184462 | 0.2046 | 1.0951 |
| 6:29926139 | 0.2049 | 1.1507 |
| 6:30925985 | 0.2057 | 0.7881 |
| 6:32667318 | 0.2058 | 1.1226 |
| 6:30569489 | 0.2059 | 1.1086 |
| 6:30785886 | 0.2059 | 0.8952 |
| 6:31236567 | 0.2067 | 1.087  |
| 6:31602967 | 0.2067 | 1.0924 |
| 6:31340611 | 0.2069 | 1.1032 |
| 6:31620020 | 0.2075 | 1.0914 |
| 6:29935590 | 0.2078 | 0.7698 |
| 6:31354238 | 0.2079 | 1.1694 |
| 6:30104783 | 0.208  | 0.8991 |
| 6:31617957 | 0.2084 | 1.0911 |
| 6:31333716 | 0.2085 | 0.6746 |
| 6:31252747 | 0.2086 | 1.2367 |
| 6:31188654 | 0.2089 | 0.7395 |
| 6:31610384 | 0.2089 | 1.0905 |
| 6:32080146 | 0.2089 | 1.1481 |
| 6:31184425 | 0.209  | 1.157  |
| 6:30976219 | 0.2098 | 0.7767 |
| 6:32169574 | 0.2098 | 1.0977 |
| 6:32413459 | 0.2109 | 1.1034 |
| 6:31618121 | 0.2111 | 1.0905 |
| 6:32730012 | 0.2114 | 1.0867 |
| 6:30633875 | 0.2115 | 1.1757 |
| 6:31081989 | 0.2118 | 0.9154 |
| 6:30350660 | 0.2119 | 1.1101 |
| 6:29937127 | 0.2123 | 0.7413 |
| 6:31207351 | 0.2135 | 1.1106 |
| 6:31333303 | 0.2138 | 0.9007 |
| 6:31475763 | 0.214  | 1.3185 |

|            |        |        |
|------------|--------|--------|
| 6:31258868 | 0.2141 | 1.2402 |
| 6:32669439 | 0.2143 | 1.1229 |
| 6:30791409 | 0.2144 | 0.8969 |
| 6:31936679 | 0.2149 | 0.8765 |
| 6:32948804 | 0.2151 | 1.1214 |
| 6:32171075 | 0.2154 | 1.1087 |
| 6:29936351 | 0.2157 | 0.7442 |
| 6:32306419 | 0.2162 | 0.9127 |
| 6:32798795 | 0.2176 | 0.9248 |
| 6:32666943 | 0.2177 | 1.1215 |
| 6:30573842 | 0.218  | 1.1058 |
| 6:30778786 | 0.218  | 0.9012 |
| 6:30787175 | 0.218  | 0.8977 |
| 6:31252667 | 0.218  | 1.2428 |
| 6:31351608 | 0.2182 | 1.0889 |
| 6:29742108 | 0.2184 | 0.9167 |
| 6:31437195 | 0.2188 | 1.0913 |
| 6:30137649 | 0.2192 | 1.1724 |
| 6:29806341 | 0.22   | 0.8477 |
| 6:30794617 | 0.2204 | 1.0859 |
| 6:29828270 | 0.2207 | 0.8499 |
| 6:32221782 | 0.2207 | 1.0993 |
| 6:30127873 | 0.2208 | 1.1717 |
| 6:32825090 | 0.221  | 0.891  |
| 6:29936914 | 0.2212 | 0.7456 |
| 6:32402705 | 0.2215 | 1.1376 |
| 6:30033884 | 0.2227 | 0.8569 |
| 6:30056985 | 0.2236 | 0.7108 |
| 6:30333380 | 0.2238 | 1.1622 |
| 6:32217413 | 0.2243 | 1.1027 |
| 6:30680916 | 0.2245 | 1.1045 |
| 6:30782361 | 0.2247 | 0.8995 |
| 6:30117913 | 0.2258 | 0.8931 |
| 6:32671676 | 0.2264 | 1.118  |
| 6:30449046 | 0.2266 | 0.9073 |
| 6:30716117 | 0.2266 | 1.3899 |
| 6:32208921 | 0.2271 | 0.8699 |
| 6:29996255 | 0.2279 | 1.1392 |
| 6:31259902 | 0.2281 | 1.2391 |
| 6:31362930 | 0.2292 | 0.9185 |
| 6:32400344 | 0.2295 | 1.1351 |

|            |        |        |
|------------|--------|--------|
| 6:31147094 | 0.2296 | 0.6246 |
| 6:32434830 | 0.2303 | 1.099  |
| 6:29933261 | 0.2307 | 1.1485 |
| 6:32404859 | 0.2307 | 1.1094 |
| 6:29934454 | 0.2308 | 1.1503 |
| 6:32687973 | 0.2312 | 0.78   |
| 6:31318024 | 0.2314 | 0.8227 |
| 6:30790604 | 0.2315 | 0.9005 |
| 6:30790798 | 0.2315 | 0.9005 |
| 6:31352113 | 0.2315 | 0.6872 |
| 6:29820503 | 0.2319 | 0.8521 |
| 6:30339245 | 0.232  | 1.1595 |
| 6:31934372 | 0.232  | 0.8809 |
| 6:30334339 | 0.2322 | 1.1079 |
| 6:31933161 | 0.2323 | 0.881  |
| 6:30793314 | 0.2325 | 0.9007 |
| 6:31317382 | 0.2328 | 0.8232 |
| 6:32412539 | 0.2328 | 1.0985 |
| 6:31317024 | 0.233  | 0.8213 |
| 6:29940372 | 0.2333 | 1.121  |
| 6:32989281 | 0.2338 | 1.0802 |
| 6:30030114 | 0.2341 | 1.1378 |
| 6:31091992 | 0.2344 | 0.9277 |
| 6:30330341 | 0.2348 | 1.1068 |
| 6:31061013 | 0.2348 | 1.1158 |
| 6:31601513 | 0.235  | 1.0859 |
| 6:31935311 | 0.235  | 0.8815 |
| 6:31016114 | 0.2353 | 0.7651 |
| 6:29746367 | 0.2359 | 0.9192 |
| 6:31616366 | 0.2359 | 1.0857 |
| 6:30796073 | 0.2362 | 0.9015 |
| 6:32665597 | 0.2363 | 0.8567 |
| 6:32432615 | 0.2379 | 1.0972 |
| 6:32668898 | 0.2381 | 1.1196 |
| 6:29774856 | 0.2382 | 0.9198 |
| 6:30037990 | 0.2386 | 1.1385 |
| 6:30785273 | 0.239  | 0.9018 |
| 6:32413259 | 0.2392 | 1.0971 |
| 6:32412480 | 0.2393 | 1.0971 |
| 6:32413094 | 0.2393 | 1.0971 |
| 6:32989244 | 0.2394 | 1.0757 |

|            |        |        |
|------------|--------|--------|
| 6:32350454 | 0.2396 | 0.7805 |
| 6:29742299 | 0.2397 | 0.9199 |
| 6:31335566 | 0.2399 | 1.0975 |
| 6:31528130 | 0.2401 | 0.8745 |
| 6:30066358 | 0.2405 | 1.0961 |
| 6:31702710 | 0.2406 | 1.2269 |
| 6:29937826 | 0.2413 | 1.1576 |
| 6:31155186 | 0.2413 | 0.9029 |
| 6:31271070 | 0.2421 | 0.6704 |
| 6:32438598 | 0.2423 | 1.0962 |
| 6:32688638 | 0.2424 | 0.9091 |
| 6:30757575 | 0.2425 | 0.9226 |
| 6:30778403 | 0.2437 | 0.903  |
| 6:31155670 | 0.2439 | 0.9034 |
| 6:32432664 | 0.2458 | 1.0955 |
| 6:31424607 | 0.2461 | 1.125  |
| 6:32668917 | 0.2462 | 1.1188 |
| 6:32669084 | 0.2462 | 1.1188 |
| 6:32669156 | 0.2462 | 1.1188 |
| 6:32669878 | 0.2462 | 1.1188 |
| 6:32670037 | 0.2462 | 1.1188 |
| 6:32670978 | 0.2462 | 1.1188 |
| 6:32337686 | 0.2463 | 1.1722 |
| 6:32671521 | 0.2463 | 1.1194 |
| 6:31218889 | 0.2468 | 1.1024 |
| 6:32590925 | 0.2468 | 1.1094 |
| 6:30749712 | 0.2473 | 0.9234 |
| 6:31329932 | 0.2473 | 1.0898 |
| 6:32917857 | 0.2473 | 1.1125 |
| 6:32428285 | 0.2474 | 1.1088 |
| 6:32432858 | 0.2492 | 1.0948 |
| 6:30446055 | 0.2496 | 0.9041 |
| 6:32669883 | 0.2503 | 1.1184 |
| 6:30789799 | 0.2505 | 0.9043 |
| 6:31258837 | 0.2509 | 1.0783 |
| 6:33024711 | 0.251  | 1.1344 |
| 6:32430167 | 0.2522 | 1.0942 |
| 6:32434939 | 0.2523 | 1.0941 |
| 6:31266208 | 0.2526 | 1.0787 |
| 6:32430729 | 0.2529 | 1.0941 |
| 6:33034404 | 0.2534 | 1.1428 |



|            |        |        |
|------------|--------|--------|
| 6:30394628 | 0.2539 | 0.8979 |
| 6:33024908 | 0.2546 | 1.1383 |
| 6:32429739 | 0.2554 | 1.0935 |
| 6:32431105 | 0.2554 | 1.0934 |
| 6:31271630 | 0.2556 | 0.6734 |
| 6:30754540 | 0.256  | 0.9247 |
| 6:32255417 | 0.2564 | 0.7684 |
| 6:31024808 | 0.2566 | 0.7881 |
| 6:32434639 | 0.2569 | 1.0934 |
| 6:30756593 | 0.257  | 0.9248 |
| 6:30756596 | 0.257  | 0.9248 |
| 6:30296681 | 0.2574 | 1.0953 |
| 6:30758348 | 0.2576 | 0.9249 |
| 6:32763821 | 0.2576 | 0.924  |
| 6:29836524 | 0.2581 | 0.8598 |
| 6:32779996 | 0.2585 | 0.9251 |
| 6:31232543 | 0.2586 | 0.7568 |
| 6:32431129 | 0.2591 | 1.0928 |
| 6:31636031 | 0.2593 | 1.1152 |
| 6:32730940 | 0.2596 | 1.1639 |
| 6:31271775 | 0.2597 | 0.6744 |
| 6:30753146 | 0.26   | 0.9253 |
| 6:32279532 | 0.26   | 0.7689 |
| 6:30208364 | 0.2605 | 1.2733 |
| 6:31063233 | 0.2609 | 0.9291 |
| 6:31317291 | 0.2613 | 0.8326 |
| 6:30119890 | 0.2615 | 1.1508 |
| 6:31671498 | 0.262  | 0.8863 |
| 6:30755320 | 0.2625 | 0.9257 |
| 6:31313482 | 0.2625 | 0.5402 |
| 6:30756744 | 0.2626 | 0.9257 |
| 6:32776976 | 0.2628 | 0.925  |
| 6:30756140 | 0.2634 | 0.9258 |
| 6:32626739 | 0.2634 | 0.9213 |
| 6:31188267 | 0.2635 | 1.0857 |
| 6:32439508 | 0.2637 | 1.092  |
| 6:32207512 | 0.2638 | 0.8258 |
| 6:30755744 | 0.2639 | 0.9259 |
| 6:30755863 | 0.2639 | 0.9259 |
| 6:30755893 | 0.2639 | 0.9259 |
| 6:32410691 | 0.2641 | 0.9028 |

|            |        |        |
|------------|--------|--------|
| 6:32668258 | 0.2646 | 1.1159 |
| 6:33053577 | 0.2647 | 1.1632 |
| 6:32428804 | 0.2655 | 1.0915 |
| 6:32802820 | 0.2655 | 0.9317 |
| 6:32775821 | 0.2657 | 0.9254 |
| 6:31024601 | 0.2659 | 0.7894 |
| 6:31640518 | 0.2659 | 1.0802 |
| 6:31449022 | 0.266  | 0.8924 |
| 6:30756822 | 0.2662 | 0.9261 |
| 6:33032188 | 0.2662 | 1.142  |
| 6:31425499 | 0.2664 | 0.926  |
| 6:32208843 | 0.2664 | 0.8264 |
| 6:32865911 | 0.2664 | 0.9017 |
| 6:30436681 | 0.2665 | 0.9014 |
| 6:32415080 | 0.2666 | 0.9081 |
| 6:31240721 | 0.2671 | 0.8651 |
| 6:32420179 | 0.2671 | 1.09   |
| 6:31717696 | 0.2674 | 1.2199 |
| 6:32961361 | 0.2676 | 0.8979 |
| 6:32923993 | 0.2677 | 0.8706 |
| 6:31586094 | 0.2678 | 1.1133 |
| 6:30237859 | 0.2681 | 0.9058 |
| 6:32777216 | 0.2684 | 0.9258 |
| 6:31733650 | 0.269  | 1.2212 |
| 6:30108683 | 0.2697 | 0.9045 |
| 6:31271601 | 0.2702 | 0.681  |
| 6:32297209 | 0.2708 | 0.7705 |
| 6:33026517 | 0.2708 | 1.1406 |
| 6:33026524 | 0.2708 | 1.1406 |
| 6:30209836 | 0.2709 | 1.2552 |
| 6:31336960 | 0.271  | 1.1306 |
| 6:32626130 | 0.271  | 1.1777 |
| 6:30063496 | 0.2719 | 1.0902 |
| 6:31111180 | 0.2734 | 0.9272 |
| 6:31543758 | 0.2737 | 0.8118 |
| 6:32923988 | 0.2737 | 0.8721 |
| 6:33037768 | 0.2738 | 1.1256 |
| 6:31259531 | 0.2739 | 0.6843 |
| 6:32209198 | 0.2739 | 0.8471 |
| 6:32954689 | 0.2739 | 0.872  |
| 6:33036853 | 0.2741 | 1.1392 |

|            |        |        |
|------------|--------|--------|
| 6:32767620 | 0.2743 | 1.0899 |
| 6:32951662 | 0.2743 | 0.8723 |
| 6:31838940 | 0.2748 | 1.4086 |
| 6:32737507 | 0.2751 | 1.1624 |
| 6:29809382 | 0.2754 | 0.919  |
| 6:31273301 | 0.2754 | 0.6783 |
| 6:31465917 | 0.276  | 0.812  |
| 6:31868938 | 0.2764 | 0.6676 |
| 6:31257012 | 0.2771 | 0.6787 |
| 6:33049965 | 0.2771 | 1.1599 |
| 6:32934409 | 0.2773 | 0.873  |
| 6:30752184 | 0.2778 | 0.9279 |
| 6:31114900 | 0.2778 | 0.9277 |
| 6:30599702 | 0.2785 | 1.0929 |
| 6:31314781 | 0.2785 | 0.9212 |
| 6:31607111 | 0.2786 | 0.7379 |
| 6:31605768 | 0.2788 | 0.7292 |
| 6:31272421 | 0.2791 | 0.6791 |
| 6:32569691 | 0.2793 | 1.0855 |
| 6:30209977 | 0.2794 | 1.2658 |
| 6:30142674 | 0.2796 | 1.1461 |
| 6:31255500 | 0.2796 | 0.7264 |
| 6:32441100 | 0.2799 | 1.1047 |
| 6:30208902 | 0.2801 | 1.2664 |
| 6:29943715 | 0.2803 | 0.9266 |
| 6:31271195 | 0.2804 | 0.6795 |
| 6:31424778 | 0.2807 | 0.9282 |
| 6:32194854 | 0.281  | 0.9272 |
| 6:29757995 | 0.2811 | 0.9252 |
| 6:33036210 | 0.2814 | 1.1397 |
| 6:33024738 | 0.2815 | 1.1335 |
| 6:31264922 | 0.2817 | 0.6799 |
| 6:29943178 | 0.2822 | 0.8265 |
| 6:30212504 | 0.2829 | 1.2699 |
| 6:31634193 | 0.2831 | 1.0772 |
| 6:30222020 | 0.2833 | 1.2719 |
| 6:30075903 | 0.284  | 0.8995 |
| 6:30119392 | 0.2843 | 0.9045 |
| 6:31230882 | 0.2844 | 1.0846 |
| 6:33036233 | 0.2847 | 1.1389 |
| 6:33036617 | 0.2847 | 1.1389 |

|            |        |        |
|------------|--------|--------|
| 6:33036631 | 0.2847 | 1.1389 |
| 6:30109207 | 0.2849 | 0.7615 |
| 6:31244520 | 0.2858 | 0.7686 |
| 6:32852647 | 0.2858 | 0.8843 |
| 6:32686103 | 0.2862 | 0.9159 |
| 6:30141204 | 0.287  | 1.1688 |
| 6:31256561 | 0.287  | 0.6812 |
| 6:31244021 | 0.2872 | 1.0739 |
| 6:31268183 | 0.2874 | 0.7996 |
| 6:31271226 | 0.2875 | 0.6933 |
| 6:31312538 | 0.2875 | 0.9227 |
| 6:32207483 | 0.2879 | 0.8338 |
| 6:29938025 | 0.2886 | 1.2233 |
| 6:31115874 | 0.2891 | 0.9295 |
| 6:31257376 | 0.2891 | 0.6817 |
| 6:32677397 | 0.2891 | 0.7981 |
| 6:33037580 | 0.2892 | 1.1298 |
| 6:31272322 | 0.2895 | 0.6817 |
| 6:31272396 | 0.2895 | 0.6817 |
| 6:30986554 | 0.2896 | 1.2126 |
| 6:33037522 | 0.2896 | 1.1237 |
| 6:31271662 | 0.2897 | 0.6818 |
| 6:31272122 | 0.2898 | 0.6822 |
| 6:32373796 | 0.29   | 0.8    |
| 6:29930619 | 0.2901 | 1.1949 |
| 6:31132140 | 0.2906 | 1.0707 |
| 6:31354287 | 0.2906 | 0.9232 |
| 6:33030470 | 0.2907 | 1.1383 |
| 6:30767013 | 0.2909 | 0.9303 |
| 6:31354388 | 0.2912 | 0.9233 |
| 6:32710307 | 0.2915 | 0.57   |
| 6:32778531 | 0.2917 | 0.9291 |
| 6:33036971 | 0.2917 | 1.1379 |
| 6:33036999 | 0.2917 | 1.1379 |
| 6:30728290 | 0.2925 | 1.0758 |
| 6:31273224 | 0.2925 | 0.6825 |
| 6:31255434 | 0.2926 | 0.6826 |
| 6:32914297 | 0.2927 | 0.8767 |
| 6:31272447 | 0.2929 | 0.6825 |
| 6:29830591 | 0.293  | 1.1611 |
| 6:29722515 | 0.2932 | 0.8942 |

|            |        |        |
|------------|--------|--------|
| 6:31107258 | 0.2932 | 0.9301 |
| 6:31235276 | 0.2932 | 1.083  |
| 6:30113955 | 0.294  | 0.9066 |
| 6:31273422 | 0.2945 | 0.6826 |
| 6:31273595 | 0.2946 | 0.683  |
| 6:32313550 | 0.2948 | 0.9255 |
| 6:32584237 | 0.2948 | 0.5852 |
| 6:32739888 | 0.2948 | 0.9189 |
| 6:32411376 | 0.295  | 0.908  |
| 6:31359599 | 0.2951 | 0.9239 |
| 6:30986040 | 0.296  | 0.7353 |
| 6:30773899 | 0.2961 | 0.9309 |
| 6:31243971 | 0.2961 | 1.0727 |
| 6:32781433 | 0.2961 | 1.2161 |
| 6:30823760 | 0.2965 | 0.8951 |
| 6:30983348 | 0.2965 | 0.7354 |
| 6:31272853 | 0.2965 | 0.682  |
| 6:31273455 | 0.2973 | 0.6836 |
| 6:32066177 | 0.2974 | 1.0804 |
| 6:32190620 | 0.2976 | 0.9242 |
| 6:31340433 | 0.2982 | 1.0675 |
| 6:32626311 | 0.2985 | 1.1268 |
| 6:33033022 | 0.2985 | 1.1371 |
| 6:33032822 | 0.2986 | 1.1366 |
| 6:30756361 | 0.2987 | 0.9306 |
| 6:33035877 | 0.2987 | 1.137  |
| 6:31591808 | 0.299  | 1.0923 |
| 6:30154928 | 0.2991 | 1.0935 |
| 6:32194740 | 0.2991 | 0.9298 |
| 6:31353950 | 0.2993 | 0.9246 |
| 6:32853042 | 0.2993 | 0.8872 |
| 6:31107087 | 0.2996 | 0.9308 |
| 6:31264912 | 0.2998 | 0.6843 |
| 6:31274027 | 0.2998 | 1.0688 |
| 6:31273562 | 0.2999 | 0.6626 |
| 6:32765383 | 0.3    | 0.9303 |
| 6:32709964 | 0.3007 | 0.7866 |
| 6:31255541 | 0.301  | 0.6847 |
| 6:31256591 | 0.301  | 0.6846 |
| 6:31259854 | 0.301  | 0.6846 |
| 6:32199352 | 0.301  | 1.0791 |

|            |        |        |
|------------|--------|--------|
| 6:31341379 | 0.3014 | 1.0671 |
| 6:33032272 | 0.302  | 1.1367 |
| 6:29717380 | 0.3021 | 1.0892 |
| 6:33032347 | 0.3022 | 1.1361 |
| 6:31259137 | 0.3024 | 0.6664 |
| 6:32194751 | 0.3026 | 0.9303 |
| 6:31087354 | 0.3029 | 1.0721 |
| 6:32317635 | 0.3029 | 0.9267 |
| 6:32194609 | 0.3032 | 0.9304 |
| 6:31353541 | 0.3036 | 0.9253 |
| 6:30794346 | 0.3042 | 0.9323 |
| 6:29984252 | 0.3044 | 0.8035 |
| 6:31353323 | 0.3044 | 0.9254 |
| 6:32686248 | 0.3044 | 0.919  |
| 6:31601843 | 0.305  | 1.0916 |
| 6:32408842 | 0.3051 | 0.9099 |
| 6:31607942 | 0.3052 | 1.1468 |
| 6:32195935 | 0.3053 | 0.9259 |
| 6:33037675 | 0.3053 | 1.122  |
| 6:32686196 | 0.3057 | 0.9192 |
| 6:30782105 | 0.3065 | 0.9324 |
| 6:29944004 | 0.3071 | 1.1284 |
| 6:32781954 | 0.3076 | 1.2102 |
| 6:32325658 | 0.308  | 0.8099 |
| 6:31566204 | 0.3081 | 0.8019 |
| 6:29785776 | 0.3084 | 0.9299 |
| 6:31193155 | 0.3084 | 0.8732 |
| 6:32317973 | 0.3085 | 0.9275 |
| 6:32946133 | 0.3086 | 1.0649 |
| 6:30231224 | 0.3089 | 0.9094 |
| 6:32310811 | 0.3095 | 0.9277 |
| 6:32688752 | 0.3099 | 0.9199 |
| 6:32179709 | 0.3101 | 0.8473 |
| 6:32221228 | 0.3101 | 1.082  |
| 6:31022489 | 0.3102 | 0.9245 |
| 6:32312351 | 0.3104 | 0.9278 |
| 6:32316604 | 0.3104 | 0.9278 |
| 6:29772395 | 0.3107 | 0.9281 |
| 6:32776854 | 0.3115 | 0.9317 |
| 6:33037265 | 0.3122 | 1.1355 |
| 6:32670000 | 0.3124 | 0.7971 |

|            |        |        |
|------------|--------|--------|
| 6:33037082 | 0.3124 | 1.1345 |
| 6:33037279 | 0.3125 | 1.1344 |
| 6:31031904 | 0.3126 | 0.9237 |
| 6:31469323 | 0.3127 | 0.9346 |
| 6:31735631 | 0.3127 | 1.2151 |
| 6:30112704 | 0.3129 | 0.9099 |
| 6:31084435 | 0.3129 | 1.0709 |
| 6:32219041 | 0.3131 | 0.8118 |
| 6:30109831 | 0.3132 | 0.91   |
| 6:32942354 | 0.3136 | 0.7567 |
| 6:29704400 | 0.3137 | 1.0738 |
| 6:29745884 | 0.3148 | 0.9305 |
| 6:31036253 | 0.3149 | 0.924  |
| 6:32719666 | 0.315  | 0.735  |
| 6:31354504 | 0.3156 | 0.9272 |
| 6:33026553 | 0.3159 | 1.1349 |
| 6:29723161 | 0.3161 | 1.1883 |
| 6:33005932 | 0.3163 | 1.0872 |
| 6:30782235 | 0.3166 | 0.9338 |
| 6:32306922 | 0.3167 | 0.8131 |
| 6:29773999 | 0.3168 | 0.9315 |
| 6:32944746 | 0.317  | 1.0638 |
| 6:31481113 | 0.3173 | 1.083  |
| 6:31812038 | 0.3174 | 1.1065 |
| 6:30113427 | 0.3176 | 0.9107 |
| 6:32682174 | 0.3177 | 1.2618 |
| 6:31439740 | 0.3178 | 1.0688 |
| 6:30112906 | 0.3179 | 0.9108 |
| 6:33037142 | 0.3189 | 1.1347 |
| 6:29766969 | 0.3196 | 0.9307 |
| 6:31232111 | 0.32   | 1.0783 |
| 6:31240988 | 0.3202 | 0.6882 |
| 6:31468546 | 0.3203 | 0.9355 |
| 6:32954634 | 0.3204 | 1.0633 |
| 6:30113344 | 0.3205 | 0.9112 |
| 6:31024738 | 0.3208 | 0.9261 |
| 6:31025848 | 0.3208 | 0.9262 |
| 6:32718452 | 0.3226 | 0.7362 |
| 6:32714516 | 0.3228 | 0.7362 |
| 6:32715722 | 0.3228 | 0.7362 |
| 6:32717024 | 0.3228 | 0.7361 |

|            |        |        |
|------------|--------|--------|
| 6:29957982 | 0.3229 | 0.8584 |
| 6:32374640 | 0.3229 | 1.271  |
| 6:32716181 | 0.323  | 0.7386 |
| 6:32714603 | 0.3231 | 0.7371 |
| 6:32720302 | 0.3235 | 0.7422 |
| 6:31024673 | 0.3236 | 0.9266 |
| 6:31038963 | 0.3237 | 0.9265 |
| 6:31233270 | 0.3238 | 1.0776 |
| 6:32724499 | 0.3242 | 0.7386 |
| 6:32681161 | 0.3245 | 1.1098 |
| 6:30786676 | 0.3248 | 0.935  |
| 6:32714083 | 0.3249 | 0.7424 |
| 6:29745794 | 0.325  | 0.9321 |
| 6:33026673 | 0.3254 | 1.1339 |
| 6:31241737 | 0.3255 | 0.69   |
| 6:32722702 | 0.3257 | 0.7409 |
| 6:32687358 | 0.3258 | 0.5989 |
| 6:32688288 | 0.326  | 0.599  |
| 6:29736995 | 0.3265 | 0.9322 |
| 6:31105672 | 0.3265 | 1.3256 |
| 6:32582577 | 0.3266 | 1.0761 |
| 6:30114101 | 0.3267 | 0.9135 |
| 6:31465103 | 0.3269 | 0.9363 |
| 6:30432785 | 0.3271 | 0.9131 |
| 6:32685648 | 0.3281 | 0.6028 |
| 6:30791971 | 0.3282 | 0.9355 |
| 6:32685673 | 0.3283 | 0.6035 |
| 6:32393150 | 0.3287 | 1.164  |
| 6:30111014 | 0.3289 | 0.9128 |
| 6:30112627 | 0.3291 | 0.9127 |
| 6:31034264 | 0.3293 | 0.9274 |
| 6:32374382 | 0.3294 | 1.2673 |
| 6:29785538 | 0.3297 | 0.933  |
| 6:32938049 | 0.3298 | 0.886  |
| 6:32988049 | 0.3298 | 0.9412 |
| 6:32313531 | 0.3299 | 0.9306 |
| 6:30110058 | 0.3304 | 0.9131 |
| 6:32627747 | 0.3306 | 0.8229 |
| 6:31266361 | 0.3307 | 1.0696 |
| 6:31360433 | 0.331  | 0.9294 |
| 6:31029173 | 0.3312 | 0.9277 |



|            |        |        |
|------------|--------|--------|
| 6:30117101 | 0.3314 | 0.9129 |
| 6:32304085 | 0.3316 | 0.8891 |
| 6:33036435 | 0.3316 | 1.1342 |
| 6:31256753 | 0.3321 | 0.8306 |
| 6:33034421 | 0.3321 | 1.1331 |
| 6:31457178 | 0.3326 | 1.0785 |
| 6:29713036 | 0.3327 | 1.2025 |
| 6:29786732 | 0.3329 | 0.9334 |
| 6:32688779 | 0.3331 | 0.6014 |
| 6:32704523 | 0.334  | 0.6017 |
| 6:32405671 | 0.3347 | 1.0882 |
| 6:31091862 | 0.3348 | 1.0678 |
| 6:32961387 | 0.3352 | 1.0613 |
| 6:32663631 | 0.3354 | 0.8268 |
| 6:31266387 | 0.3355 | 1.0689 |
| 6:31354560 | 0.3356 | 0.9301 |
| 6:33038144 | 0.3357 | 1.1175 |
| 6:30115484 | 0.3363 | 0.915  |
| 6:32936441 | 0.3363 | 0.8873 |
| 6:29765001 | 0.3366 | 0.9321 |
| 6:32984255 | 0.3373 | 1.0763 |
| 6:31632134 | 0.3377 | 1.0855 |
| 6:31192963 | 0.3379 | 0.8817 |
| 6:31026009 | 0.338  | 0.9281 |
| 6:32689362 | 0.338  | 0.6437 |
| 6:32685685 | 0.3381 | 0.6008 |
| 6:31077646 | 0.339  | 0.8106 |
| 6:32707360 | 0.3392 | 0.6033 |
| 6:31241537 | 0.3394 | 0.9349 |
| 6:30777604 | 0.3395 | 0.9369 |
| 6:29735104 | 0.34   | 0.9338 |
| 6:31265940 | 0.3404 | 1.0682 |
| 6:30095329 | 0.3409 | 0.8922 |
| 6:30194917 | 0.341  | 1.1528 |
| 6:31354104 | 0.3412 | 0.9354 |
| 6:32715653 | 0.3417 | 0.7383 |
| 6:33032831 | 0.342  | 1.1328 |
| 6:29712704 | 0.3422 | 1.2005 |
| 6:31354819 | 0.3423 | 0.931  |
| 6:31610479 | 0.3424 | 1.0845 |
| 6:32993266 | 0.3426 | 1.0627 |

|            |        |        |
|------------|--------|--------|
| 6:32707783 | 0.3427 | 0.6044 |
| 6:32704900 | 0.3428 | 0.6045 |
| 6:29927095 | 0.343  | 1.0797 |
| 6:31619576 | 0.343  | 1.0846 |
| 6:32705110 | 0.3431 | 0.6083 |
| 6:32709738 | 0.3432 | 0.6046 |
| 6:31025271 | 0.3434 | 0.9283 |
| 6:32338986 | 0.3438 | 1.0773 |
| 6:32365707 | 0.3438 | 1.0857 |
| 6:30782407 | 0.3439 | 0.9375 |
| 6:31388109 | 0.3439 | 0.9146 |
| 6:32802462 | 0.3439 | 1.1447 |
| 6:30767947 | 0.3442 | 0.9373 |
| 6:32986573 | 0.3445 | 1.077  |
| 6:30768636 | 0.3446 | 0.9374 |
| 6:31090552 | 0.3447 | 1.0662 |
| 6:33039503 | 0.3447 | 1.1149 |
| 6:31258846 | 0.3448 | 0.8326 |
| 6:33038369 | 0.3448 | 1.1149 |
| 6:33041176 | 0.345  | 1.1149 |
| 6:33041186 | 0.345  | 1.1149 |
| 6:33040798 | 0.3451 | 1.1144 |
| 6:31053257 | 0.3459 | 0.9231 |
| 6:32405192 | 0.3459 | 1.086  |
| 6:30781923 | 0.3461 | 0.9377 |
| 6:29835654 | 0.3462 | 0.8853 |
| 6:30768412 | 0.3466 | 0.9376 |
| 6:29768344 | 0.3468 | 1.0903 |
| 6:33040736 | 0.3469 | 1.118  |
| 6:33039837 | 0.3472 | 1.1162 |
| 6:32989971 | 0.3474 | 1.0622 |
| 6:33039848 | 0.3479 | 1.1152 |
| 6:31353593 | 0.3485 | 0.9363 |
| 6:32668323 | 0.3493 | 0.8829 |
| 6:30778203 | 0.3496 | 0.9382 |
| 6:31027510 | 0.3499 | 0.9293 |
| 6:29808634 | 0.3501 | 0.9309 |
| 6:32787592 | 0.3501 | 1.2465 |
| 6:31025989 | 0.3502 | 0.9299 |
| 6:32365896 | 0.3503 | 1.0845 |
| 6:32366625 | 0.3503 | 1.0845 |

|            |        |        |
|------------|--------|--------|
| 6:32755290 | 0.3505 | 1.1065 |
| 6:32787119 | 0.3509 | 1.2023 |
| 6:30176122 | 0.351  | 1.1496 |
| 6:30200873 | 0.3514 | 1.1191 |
| 6:33039980 | 0.3518 | 1.1156 |
| 6:33039606 | 0.3523 | 1.1146 |
| 6:31243884 | 0.3524 | 1.0726 |
| 6:33040596 | 0.3527 | 1.1141 |
| 6:33040835 | 0.3527 | 1.1141 |
| 6:32692780 | 0.3528 | 0.6168 |
| 6:33039767 | 0.3528 | 1.114  |
| 6:30199016 | 0.3531 | 1.1195 |
| 6:30608273 | 0.3532 | 1.163  |
| 6:32690157 | 0.3532 | 0.6169 |
| 6:30094611 | 0.3533 | 0.8956 |
| 6:32667119 | 0.3533 | 0.8221 |
| 6:31355474 | 0.3535 | 0.9326 |
| 6:31406811 | 0.3536 | 0.9158 |
| 6:32698026 | 0.3536 | 0.617  |
| 6:31340559 | 0.3539 | 1.081  |
| 6:29734098 | 0.3541 | 0.9063 |
| 6:32900642 | 0.3542 | 0.8962 |
| 6:31407579 | 0.3543 | 0.8519 |
| 6:31219982 | 0.3545 | 0.9342 |
| 6:32266506 | 0.3545 | 0.7845 |
| 6:31269308 | 0.3546 | 0.7291 |
| 6:33041034 | 0.3564 | 1.1137 |
| 6:33040781 | 0.3566 | 1.1136 |
| 6:31710020 | 0.358  | 1.0661 |
| 6:32400088 | 0.3586 | 1.0838 |
| 6:33025493 | 0.3589 | 0.825  |
| 6:33038766 | 0.3603 | 1.1133 |
| 6:31342801 | 0.3608 | 1.0711 |
| 6:31342827 | 0.3609 | 1.0712 |
| 6:32669018 | 0.3611 | 0.9283 |
| 6:31355119 | 0.3612 | 0.9338 |
| 6:32589095 | 0.3612 | 1.1527 |
| 6:32367927 | 0.3619 | 1.0824 |
| 6:31093482 | 0.3622 | 1.0595 |
| 6:31262438 | 0.3627 | 1.0642 |
| 6:32256473 | 0.3628 | 0.9279 |

|            |        |        |
|------------|--------|--------|
| 6:29944314 | 0.3633 | 1.0708 |
| 6:32411573 | 0.3633 | 0.8287 |
| 6:30076630 | 0.3639 | 0.9413 |
| 6:30434900 | 0.3641 | 0.9016 |
| 6:31029282 | 0.3642 | 1.1555 |
| 6:30140342 | 0.3648 | 1.1305 |
| 6:32980446 | 0.3653 | 1.1222 |
| 6:32668336 | 0.3659 | 0.8769 |
| 6:33042551 | 0.366  | 0.8386 |
| 6:31340328 | 0.3664 | 1.0794 |
| 6:31409857 | 0.3669 | 0.9185 |
| 6:31339240 | 0.3676 | 1.0742 |
| 6:30397089 | 0.3679 | 0.9206 |
| 6:31243830 | 0.368  | 0.8552 |
| 6:32266425 | 0.3683 | 1.1545 |
| 6:32279902 | 0.3683 | 1.1545 |
| 6:29723674 | 0.3684 | 1.0686 |
| 6:31360526 | 0.3684 | 0.9346 |
| 6:31361897 | 0.3687 | 0.9389 |
| 6:29759823 | 0.3696 | 0.9383 |
| 6:32062687 | 0.37   | 1.0766 |
| 6:32687570 | 0.3704 | 0.9285 |
| 6:33031677 | 0.3704 | 1.1281 |
| 6:31914179 | 0.3709 | 1.1031 |
| 6:31360341 | 0.3711 | 0.935  |
| 6:31298681 | 0.3733 | 0.9338 |
| 6:31327064 | 0.3742 | 0.8435 |
| 6:32379489 | 0.3743 | 1.0713 |
| 6:32976654 | 0.3748 | 1.122  |
| 6:30397840 | 0.3753 | 0.9217 |
| 6:31361485 | 0.3755 | 0.9356 |
| 6:32804414 | 0.3762 | 1.0638 |
| 6:31384578 | 0.3765 | 0.92   |
| 6:31366622 | 0.3768 | 0.94   |
| 6:32813768 | 0.3773 | 1.1113 |
| 6:32030284 | 0.3778 | 1.0657 |
| 6:31361710 | 0.3782 | 0.9402 |
| 6:32401327 | 0.3788 | 1.1474 |
| 6:30321189 | 0.3793 | 0.9119 |
| 6:32283844 | 0.38   | 1.1526 |
| 6:32161430 | 0.3803 | 0.9241 |

|            |        |        |
|------------|--------|--------|
| 6:30768955 | 0.3806 | 0.9416 |
| 6:31893944 | 0.3808 | 1.0603 |
| 6:32161366 | 0.3808 | 0.9241 |
| 6:32038700 | 0.3809 | 1.068  |
| 6:31360255 | 0.3819 | 0.9364 |
| 6:32834732 | 0.3823 | 1.0612 |
| 6:32783387 | 0.3825 | 1.1917 |
| 6:33033894 | 0.3826 | 1.1268 |
| 6:30206186 | 0.3827 | 1.1404 |
| 6:29839268 | 0.383  | 0.9085 |
| 6:31421297 | 0.3833 | 1.0574 |
| 6:29773158 | 0.3834 | 0.7816 |
| 6:30106202 | 0.3834 | 0.9165 |
| 6:31366595 | 0.3846 | 0.9408 |
| 6:30139699 | 0.3848 | 0.9204 |
| 6:30434566 | 0.3849 | 0.9039 |
| 6:32715160 | 0.3853 | 0.6336 |
| 6:33042598 | 0.3854 | 0.8444 |
| 6:32798350 | 0.3858 | 0.9131 |
| 6:29769829 | 0.3879 | 0.9391 |
| 6:32367515 | 0.3882 | 1.0778 |
| 6:32782387 | 0.3882 | 1.0709 |
| 6:30609661 | 0.3886 | 1.1499 |
| 6:29767611 | 0.3896 | 0.8232 |
| 6:32670308 | 0.39   | 0.8845 |
| 6:30649134 | 0.3902 | 1.2162 |
| 6:32850839 | 0.3906 | 0.9051 |
| 6:30385618 | 0.3909 | 0.9066 |
| 6:31082404 | 0.3912 | 1.059  |
| 6:31264598 | 0.3915 | 0.9241 |
| 6:30649540 | 0.3922 | 1.2158 |
| 6:31407828 | 0.3924 | 0.9222 |
| 6:32136838 | 0.3925 | 1.0679 |
| 6:31264246 | 0.3934 | 0.9244 |
| 6:31075161 | 0.3936 | 0.817  |
| 6:32765585 | 0.3938 | 1.0974 |
| 6:31112075 | 0.3939 | 0.9471 |
| 6:32787056 | 0.3962 | 0.9301 |
| 6:32431358 | 0.3978 | 1.0793 |
| 6:31766844 | 0.3984 | 1.1402 |
| 6:30979910 | 0.3985 | 0.8393 |

|            |        |        |
|------------|--------|--------|
| 6:33025450 | 0.3985 | 0.84   |
| 6:30423223 | 0.3988 | 0.9256 |
| 6:31603591 | 0.3989 | 0.9468 |
| 6:33039855 | 0.3993 | 1.1039 |
| 6:31337850 | 0.3997 | 1.0726 |
| 6:32447364 | 0.4    | 1.0789 |
| 6:30441652 | 0.4001 | 1.074  |
| 6:32660375 | 0.4005 | 0.881  |
| 6:32371269 | 0.4018 | 1.0674 |
| 6:30419258 | 0.4022 | 0.9136 |
| 6:32192617 | 0.4022 | 0.8668 |
| 6:30532278 | 0.4024 | 1.0721 |
| 6:32367604 | 0.4024 | 1.0756 |
| 6:32825348 | 0.4024 | 0.8902 |
| 6:31235751 | 0.4025 | 1.1082 |
| 6:32822858 | 0.403  | 0.892  |
| 6:32355511 | 0.4032 | 1.1228 |
| 6:30409037 | 0.4034 | 0.9263 |
| 6:30425455 | 0.4034 | 0.9263 |
| 6:31068026 | 0.4034 | 0.8117 |
| 6:32977044 | 0.4035 | 1.119  |
| 6:32759335 | 0.4036 | 0.9433 |
| 6:32830013 | 0.4037 | 0.8951 |
| 6:32336766 | 0.404  | 0.9252 |
| 6:29929336 | 0.4043 | 1.114  |
| 6:30414919 | 0.4043 | 0.9264 |
| 6:30105391 | 0.4048 | 0.9094 |
| 6:30412504 | 0.4048 | 0.9265 |
| 6:30414235 | 0.4052 | 0.9266 |
| 6:30418583 | 0.4052 | 0.9266 |
| 6:29928574 | 0.4053 | 1.1225 |
| 6:31237405 | 0.4056 | 1.0597 |
| 6:30410153 | 0.4057 | 0.9266 |
| 6:30424074 | 0.4059 | 0.9254 |
| 6:30171881 | 0.4062 | 1.1009 |
| 6:31417456 | 0.4063 | 0.9225 |
| 6:32196873 | 0.4064 | 0.8935 |
| 6:30108751 | 0.4065 | 0.9077 |
| 6:30920957 | 0.4065 | 0.9315 |
| 6:32410210 | 0.4066 | 0.9271 |
| 6:31238613 | 0.4067 | 1.0592 |

|            |        |        |
|------------|--------|--------|
| 6:30168301 | 0.4069 | 1.1331 |
| 6:30170699 | 0.4069 | 1.1331 |
| 6:30426078 | 0.4076 | 0.9267 |
| 6:31237048 | 0.4076 | 1.0586 |
| 6:31344670 | 0.4077 | 1.0594 |
| 6:30076755 | 0.4078 | 0.948  |
| 6:30423358 | 0.4078 | 0.9268 |
| 6:30424676 | 0.4078 | 0.9268 |
| 6:30427510 | 0.4078 | 0.9268 |
| 6:32833646 | 0.4079 | 0.896  |
| 6:31344273 | 0.4081 | 1.0538 |
| 6:32376746 | 0.4081 | 1.0665 |
| 6:30428227 | 0.4082 | 0.927  |
| 6:30413494 | 0.4083 | 0.9268 |
| 6:30423187 | 0.4083 | 0.9268 |
| 6:30411089 | 0.4088 | 0.9265 |
| 6:30015167 | 0.4089 | 0.92   |
| 6:31237124 | 0.4089 | 1.058  |
| 6:32671765 | 0.4091 | 0.8869 |
| 6:29820047 | 0.4092 | 0.913  |
| 6:30106493 | 0.4092 | 0.9056 |
| 6:30159266 | 0.4093 | 1.1324 |
| 6:31237664 | 0.4094 | 1.0579 |
| 6:30410824 | 0.4099 | 0.9269 |
| 6:30419859 | 0.4099 | 0.9269 |
| 6:31780594 | 0.41   | 1.2374 |
| 6:31273745 | 0.4101 | 1.0553 |
| 6:29775662 | 0.4103 | 0.9046 |
| 6:30516458 | 0.4111 | 1.0706 |
| 6:30980582 | 0.4121 | 0.8412 |
| 6:32336364 | 0.4122 | 0.9267 |
| 6:31585084 | 0.4126 | 0.944  |
| 6:30417704 | 0.4133 | 0.9278 |
| 6:32412592 | 0.4135 | 0.9281 |
| 6:32911127 | 0.4135 | 0.9043 |
| 6:31269022 | 0.4138 | 1.0581 |
| 6:30151954 | 0.4139 | 1.131  |
| 6:31337671 | 0.4143 | 1.0707 |
| 6:29726550 | 0.4146 | 1.0539 |
| 6:30993958 | 0.4146 | 1.1255 |
| 6:29955199 | 0.4147 | 1.1197 |

|            |        |        |
|------------|--------|--------|
| 6:32787310 | 0.4148 | 0.8957 |
| 6:30120268 | 0.4154 | 0.9249 |
| 6:31079894 | 0.416  | 0.8192 |
| 6:32332322 | 0.4167 | 0.9273 |
| 6:31342960 | 0.4169 | 1.0631 |
| 6:31089631 | 0.4172 | 0.8897 |
| 6:32674952 | 0.4177 | 0.8967 |
| 6:32424882 | 0.4181 | 0.9309 |
| 6:31246676 | 0.4183 | 1.0844 |
| 6:32684468 | 0.4184 | 0.7317 |
| 6:32985594 | 0.4186 | 1.1056 |
| 6:29788606 | 0.4187 | 0.9435 |
| 6:30419926 | 0.4187 | 0.9286 |
| 6:32670897 | 0.4187 | 0.8876 |
| 6:32670464 | 0.4192 | 0.8883 |
| 6:32586221 | 0.4194 | 0.9176 |
| 6:31489644 | 0.4196 | 1.0543 |
| 6:32351510 | 0.4197 | 0.8308 |
| 6:31459972 | 0.4199 | 0.948  |
| 6:30120633 | 0.4201 | 0.9255 |
| 6:30986527 | 0.4206 | 0.8422 |
| 6:32315727 | 0.4207 | 1.1239 |
| 6:30099996 | 0.4221 | 0.9257 |
| 6:32796653 | 0.4223 | 0.887  |
| 6:31263216 | 0.4227 | 0.929  |
| 6:32682862 | 0.4231 | 0.9333 |
| 6:30094315 | 0.4235 | 0.9269 |
| 6:32789480 | 0.4237 | 0.8856 |
| 6:31628733 | 0.4239 | 0.949  |
| 6:31066671 | 0.425  | 0.8532 |
| 6:32591629 | 0.425  | 0.8732 |
| 6:31540313 | 0.4252 | 0.9458 |
| 6:30386027 | 0.4255 | 0.9105 |
| 6:31080899 | 0.4256 | 0.8329 |
| 6:30420907 | 0.4264 | 0.9276 |
| 6:31692163 | 0.4265 | 1.0569 |
| 6:32299822 | 0.4273 | 0.914  |
| 6:31639979 | 0.4275 | 1.1073 |
| 6:29733223 | 0.4279 | 0.9441 |
| 6:30378601 | 0.428  | 0.9101 |
| 6:30979824 | 0.4284 | 0.8441 |



|            |        |        |
|------------|--------|--------|
| 6:30377705 | 0.4288 | 0.9102 |
| 6:31107187 | 0.4288 | 0.9398 |
| 6:30103840 | 0.429  | 0.91   |
| 6:32688539 | 0.429  | 0.6249 |
| 6:31343604 | 0.4291 | 1.0661 |
| 6:32370684 | 0.4293 | 1.0636 |
| 6:30423279 | 0.4295 | 0.9278 |
| 6:30423370 | 0.4295 | 0.9278 |
| 6:32794676 | 0.4297 | 0.8884 |
| 6:31688217 | 0.4298 | 1.0567 |
| 6:30981715 | 0.4299 | 0.8437 |
| 6:30384317 | 0.4301 | 0.9102 |
| 6:30406756 | 0.4301 | 0.9294 |
| 6:30423577 | 0.4304 | 0.9283 |
| 6:30104808 | 0.4307 | 0.9073 |
| 6:30184704 | 0.4307 | 1.1266 |
| 6:30763562 | 0.4318 | 0.9303 |
| 6:31127037 | 0.4324 | 0.8798 |
| 6:31245309 | 0.4325 | 1.0822 |
| 6:29761516 | 0.4326 | 0.946  |
| 6:31086997 | 0.4326 | 0.8926 |
| 6:31087133 | 0.4326 | 0.8926 |
| 6:31088922 | 0.4327 | 0.8926 |
| 6:30983296 | 0.4329 | 0.843  |
| 6:31001143 | 0.4329 | 0.888  |
| 6:32955029 | 0.4329 | 0.8414 |
| 6:30041559 | 0.4338 | 1.0561 |
| 6:32370616 | 0.4342 | 1.0628 |
| 6:30986079 | 0.4343 | 0.8443 |
| 6:30986264 | 0.4343 | 0.8443 |
| 6:30986396 | 0.4343 | 0.8443 |
| 6:30987327 | 0.4343 | 0.8443 |
| 6:30989770 | 0.4343 | 0.8443 |
| 6:32368314 | 0.4344 | 1.0628 |
| 6:32333439 | 0.4345 | 0.9339 |
| 6:31344348 | 0.435  | 1.0657 |
| 6:30383675 | 0.4362 | 0.9111 |
| 6:30137890 | 0.437  | 1.2537 |
| 6:31238297 | 0.437  | 1.0533 |
| 6:30093744 | 0.4372 | 0.9072 |
| 6:29983715 | 0.4374 | 1.1131 |

|            |        |        |
|------------|--------|--------|
| 6:32969745 | 0.438  | 1.0951 |
| 6:32963354 | 0.4382 | 0.8431 |
| 6:30306553 | 0.4384 | 1.0699 |
| 6:32298814 | 0.4389 | 0.915  |
| 6:30120945 | 0.4391 | 0.9284 |
| 6:29724939 | 0.4398 | 0.952  |
| 6:30097920 | 0.4398 | 0.9284 |
| 6:32349946 | 0.4406 | 1.0621 |
| 6:31345021 | 0.4407 | 1.0653 |
| 6:32418031 | 0.4409 | 0.9342 |
| 6:32581628 | 0.4409 | 0.8772 |
| 6:32663925 | 0.4409 | 0.886  |
| 6:32585589 | 0.441  | 0.921  |
| 6:32792973 | 0.441  | 0.9148 |
| 6:31917291 | 0.4425 | 0.8216 |
| 6:32987774 | 0.4431 | 1.0999 |
| 6:29926128 | 0.4434 | 0.9062 |
| 6:31240692 | 0.4435 | 0.9514 |
| 6:31091328 | 0.4438 | 1.3016 |
| 6:30267748 | 0.444  | 1.0721 |
| 6:29715762 | 0.4443 | 0.9527 |
| 6:31481526 | 0.4449 | 0.9489 |
| 6:30111932 | 0.4451 | 0.9296 |
| 6:30986491 | 0.4451 | 0.846  |
| 6:30986705 | 0.4451 | 0.846  |
| 6:29714413 | 0.4452 | 0.9528 |
| 6:32795965 | 0.4453 | 0.8892 |
| 6:31465637 | 0.4455 | 0.893  |
| 6:31114573 | 0.4457 | 0.9069 |
| 6:31246015 | 0.4466 | 1.0792 |
| 6:32797361 | 0.4467 | 0.8786 |
| 6:31262169 | 0.4469 | 1.0544 |
| 6:31345876 | 0.4469 | 1.0649 |
| 6:29730730 | 0.447  | 1.0561 |
| 6:31080432 | 0.447  | 0.832  |
| 6:29925086 | 0.4472 | 0.9061 |
| 6:30986504 | 0.4472 | 0.8463 |
| 6:32822269 | 0.4474 | 0.8974 |
| 6:32659878 | 0.4477 | 0.8471 |
| 6:32924584 | 0.4477 | 1.0477 |
| 6:31347566 | 0.4478 | 1.0583 |

|            |        |        |
|------------|--------|--------|
| 6:32575983 | 0.448  | 0.8782 |
| 6:29916368 | 0.4482 | 1.1194 |
| 6:30096717 | 0.4494 | 0.9085 |
| 6:30094840 | 0.4496 | 0.9074 |
| 6:32179896 | 0.4496 | 1.0673 |
| 6:30098609 | 0.4497 | 0.9085 |
| 6:31413000 | 0.4502 | 0.6862 |
| 6:31481146 | 0.4502 | 0.9495 |
| 6:32796226 | 0.4504 | 0.8898 |
| 6:30120637 | 0.4508 | 1.0976 |
| 6:32349711 | 0.4509 | 1.0606 |
| 6:32665086 | 0.4511 | 0.8831 |
| 6:32950961 | 0.4511 | 0.8477 |
| 6:30100221 | 0.4514 | 0.9022 |
| 6:30385466 | 0.4515 | 0.9196 |
| 6:32972903 | 0.4516 | 0.9337 |
| 6:30921364 | 0.4517 | 0.9401 |
| 6:30498864 | 0.4529 | 1.0651 |
| 6:32335347 | 0.453  | 0.9328 |
| 6:32658327 | 0.4532 | 0.8873 |
| 6:31673436 | 0.4544 | 1.0876 |
| 6:30282332 | 0.455  | 1.075  |
| 6:29725321 | 0.4556 | 0.9536 |
| 6:32796521 | 0.4556 | 0.8918 |
| 6:30099951 | 0.4557 | 0.9055 |
| 6:31229644 | 0.456  | 1.0964 |
| 6:32312082 | 0.4562 | 1.1027 |
| 6:30904714 | 0.4575 | 0.9364 |
| 6:32342129 | 0.4584 | 1.0596 |
| 6:31379198 | 0.4587 | 1.0687 |
| 6:29730504 | 0.459  | 1.0563 |
| 6:32346794 | 0.4599 | 1.0593 |
| 6:30391723 | 0.46   | 0.93   |
| 6:31408004 | 0.46   | 0.6889 |
| 6:32757971 | 0.4601 | 0.9499 |
| 6:30455920 | 0.4602 | 1.0596 |
| 6:31267812 | 0.4602 | 1.0523 |
| 6:30823630 | 0.4607 | 0.9366 |
| 6:30319930 | 0.4621 | 0.9087 |
| 6:32219838 | 0.4621 | 1.1152 |
| 6:29909797 | 0.4624 | 1.1118 |

|            |        |        |
|------------|--------|--------|
| 6:31051553 | 0.4625 | 1.1195 |
| 6:31245508 | 0.4627 | 1.0764 |
| 6:30094788 | 0.4631 | 0.9054 |
| 6:30392248 | 0.4632 | 0.9301 |
| 6:31171924 | 0.4639 | 0.8415 |
| 6:32797072 | 0.4641 | 0.8829 |
| 6:30774474 | 0.4644 | 0.9366 |
| 6:30990490 | 0.4647 | 0.8544 |
| 6:32935179 | 0.4647 | 1.0458 |
| 6:29782690 | 0.4648 | 0.9363 |
| 6:30010492 | 0.4652 | 0.8251 |
| 6:30392406 | 0.4654 | 0.9302 |
| 6:32358231 | 0.4656 | 1.0587 |
| 6:32997674 | 0.4658 | 1.0559 |
| 6:32759297 | 0.4667 | 0.9505 |
| 6:31245476 | 0.4671 | 1.0756 |
| 6:32660943 | 0.4671 | 0.8503 |
| 6:30825741 | 0.4675 | 0.9378 |
| 6:31327371 | 0.4679 | 1.0797 |
| 6:31540071 | 0.468  | 0.9509 |
| 6:32357165 | 0.468  | 1.0583 |
| 6:32758219 | 0.4684 | 0.9508 |
| 6:31058178 | 0.4686 | 1.1098 |
| 6:30700695 | 0.4693 | 0.783  |
| 6:30710135 | 0.4693 | 0.7829 |
| 6:32797109 | 0.4696 | 0.8835 |
| 6:29762693 | 0.4699 | 0.949  |
| 6:32212264 | 0.4699 | 0.9415 |
| 6:31173768 | 0.47   | 0.8426 |
| 6:31141523 | 0.4702 | 0.9492 |
| 6:32782149 | 0.4712 | 0.9069 |
| 6:30392160 | 0.4715 | 0.9306 |
| 6:31244475 | 0.4719 | 1.0748 |
| 6:32330430 | 0.4719 | 0.9391 |
| 6:31432006 | 0.4721 | 0.9115 |
| 6:31113214 | 0.4722 | 1.0582 |
| 6:31118511 | 0.4722 | 1.0582 |
| 6:31266730 | 0.4722 | 1.051  |
| 6:31411406 | 0.4728 | 0.6924 |
| 6:30700558 | 0.4739 | 0.7837 |
| 6:32325399 | 0.4739 | 0.9393 |

|            |        |        |
|------------|--------|--------|
| 6:32321597 | 0.4742 | 0.6514 |
| 6:31351090 | 0.4743 | 1.1148 |
| 6:30110880 | 0.4744 | 0.9095 |
| 6:31008598 | 0.4744 | 0.9439 |
| 6:29776322 | 0.4747 | 0.9493 |
| 6:31483458 | 0.4758 | 1.0498 |
| 6:29940943 | 0.4759 | 0.8351 |
| 6:31367865 | 0.476  | 0.9497 |
| 6:31080718 | 0.4763 | 1.1022 |
| 6:32663851 | 0.4765 | 0.8405 |
| 6:32344973 | 0.477  | 1.057  |
| 6:32740761 | 0.4774 | 0.9512 |
| 6:32351901 | 0.4775 | 1.057  |
| 6:30394951 | 0.4776 | 0.934  |
| 6:31192796 | 0.4779 | 0.9279 |
| 6:31408265 | 0.4786 | 0.8257 |
| 6:30098323 | 0.4788 | 0.9341 |
| 6:30708428 | 0.4794 | 0.7845 |
| 6:30709364 | 0.4794 | 0.7845 |
| 6:30709830 | 0.4794 | 0.7845 |
| 6:30048020 | 0.48   | 0.8892 |
| 6:31190303 | 0.4803 | 1.0524 |
| 6:31515799 | 0.4803 | 0.9523 |
| 6:31125407 | 0.4807 | 1.0935 |
| 6:32796751 | 0.481  | 0.8934 |
| 6:32297417 | 0.4818 | 1.0819 |
| 6:32661294 | 0.482  | 0.8935 |
| 6:31107733 | 0.4821 | 1.0568 |
| 6:31483415 | 0.4824 | 0.9529 |
| 6:29783382 | 0.4826 | 0.9358 |
| 6:30900435 | 0.4839 | 1.1392 |
| 6:32324817 | 0.4839 | 0.9406 |
| 6:29755451 | 0.484  | 1.072  |
| 6:31120711 | 0.484  | 1.0913 |
| 6:30179422 | 0.4843 | 0.9353 |
| 6:31143582 | 0.485  | 0.9554 |
| 6:31116502 | 0.4857 | 1.0928 |
| 6:29780529 | 0.486  | 0.9507 |
| 6:32376471 | 0.486  | 0.9405 |
| 6:31387557 | 0.4863 | 0.9539 |
| 6:31094636 | 0.487  | 0.9519 |

|            |        |        |
|------------|--------|--------|
| 6:29765291 | 0.4879 | 0.951  |
| 6:29705688 | 0.4887 | 0.9057 |
| 6:30899571 | 0.4893 | 0.9409 |
| 6:32664458 | 0.4895 | 0.892  |
| 6:32392945 | 0.4905 | 0.9382 |
| 6:32754081 | 0.4909 | 0.9532 |
| 6:31389784 | 0.491  | 0.9569 |
| 6:31901773 | 0.4919 | 0.8535 |
| 6:32440487 | 0.492  | 0.891  |
| 6:32788137 | 0.4921 | 1.0664 |
| 6:30902181 | 0.4924 | 0.9415 |
| 6:29942205 | 0.4934 | 0.8425 |
| 6:32186264 | 0.4936 | 1.0531 |
| 6:30097818 | 0.4941 | 0.9363 |
| 6:30865204 | 0.4942 | 0.9416 |
| 6:30090820 | 0.4944 | 0.9358 |
| 6:32666738 | 0.4945 | 0.8889 |
| 6:31390410 | 0.4946 | 0.9549 |
| 6:32665285 | 0.4948 | 0.889  |
| 6:32807490 | 0.4953 | 1.085  |
| 6:29716901 | 0.4956 | 0.9577 |
| 6:29943656 | 0.4962 | 0.9442 |
| 6:31136666 | 0.4962 | 0.9528 |
| 6:31665194 | 0.4972 | 1.0519 |
| 6:29736229 | 0.4976 | 0.952  |
| 6:32324544 | 0.4981 | 0.9425 |
| 6:32664880 | 0.4981 | 0.8947 |
| 6:32358513 | 0.4982 | 1.0622 |
| 6:32341473 | 0.4984 | 1.0542 |
| 6:30281578 | 0.4986 | 0.9035 |
| 6:30825287 | 0.4988 | 0.9212 |
| 6:32754409 | 0.4991 | 0.954  |
| 6:32369488 | 0.4997 | 1.1029 |
| 6:30061361 | 0.5004 | 1.07   |
| 6:29942083 | 0.5013 | 0.866  |
| 6:30429033 | 0.5013 | 0.9406 |
| 6:29739906 | 0.5014 | 0.9524 |
| 6:32123639 | 0.5015 | 1.0644 |
| 6:29987122 | 0.5018 | 0.8936 |
| 6:29943281 | 0.5022 | 0.869  |
| 6:30271792 | 0.5022 | 0.9043 |

|            |        |        |
|------------|--------|--------|
| 6:29736601 | 0.5027 | 0.9526 |
| 6:32319364 | 0.5028 | 0.9431 |
| 6:31242445 | 0.503  | 1.1045 |
| 6:32786068 | 0.5032 | 1.1466 |
| 6:32974401 | 0.5042 | 0.9527 |
| 6:30690938 | 0.5046 | 0.9004 |
| 6:30955613 | 0.5048 | 0.8949 |
| 6:30115204 | 0.506  | 0.9236 |
| 6:32332564 | 0.506  | 0.9435 |
| 6:32333243 | 0.506  | 0.9435 |
| 6:32333425 | 0.506  | 0.9435 |
| 6:32367722 | 0.5064 | 1.0531 |
| 6:31267516 | 0.5068 | 1.047  |
| 6:30867958 | 0.5077 | 0.9434 |
| 6:29699156 | 0.5093 | 0.9071 |
| 6:31511350 | 0.5097 | 0.9064 |
| 6:32796019 | 0.5104 | 0.8984 |
| 6:32758571 | 0.5105 | 0.9553 |
| 6:32969616 | 0.5105 | 1.081  |
| 6:31185803 | 0.5114 | 1.0677 |
| 6:32900718 | 0.5115 | 0.9584 |
| 6:31922254 | 0.5121 | 1.0509 |
| 6:30902009 | 0.5125 | 0.944  |
| 6:30901926 | 0.5131 | 0.944  |
| 6:32658310 | 0.5132 | 0.9465 |
| 6:29942386 | 0.5137 | 0.8573 |
| 6:31042217 | 0.5143 | 1.0494 |
| 6:29938174 | 0.5151 | 0.8178 |
| 6:29983039 | 0.5152 | 1.0691 |
| 6:29942045 | 0.5156 | 0.8578 |
| 6:29938110 | 0.5165 | 0.8178 |
| 6:31175015 | 0.5169 | 0.9276 |
| 6:31947460 | 0.517  | 1.0502 |
| 6:30849822 | 0.5179 | 0.9447 |
| 6:29944184 | 0.5181 | 1.0635 |
| 6:30072721 | 0.5195 | 1.0502 |
| 6:30735105 | 0.5197 | 0.946  |
| 6:29987184 | 0.5198 | 0.8263 |
| 6:31236115 | 0.5199 | 1.0694 |
| 6:30066031 | 0.5201 | 1.0483 |
| 6:29702679 | 0.5205 | 0.9089 |

|            |        |        |
|------------|--------|--------|
| 6:31439958 | 0.5207 | 1.0481 |
| 6:29821293 | 0.5208 | 0.9318 |
| 6:31352232 | 0.5208 | 1.0676 |
| 6:29975453 | 0.5209 | 1.0631 |
| 6:32752840 | 0.5216 | 0.9564 |
| 6:31259387 | 0.5221 | 1.0439 |
| 6:31327435 | 0.5222 | 0.8792 |
| 6:30046939 | 0.5223 | 0.8993 |
| 6:31184175 | 0.5234 | 1.0657 |
| 6:31010200 | 0.5237 | 0.9286 |
| 6:32602482 | 0.5239 | 1.068  |
| 6:31331829 | 0.5242 | 1.0443 |
| 6:32326165 | 0.5242 | 0.9454 |
| 6:29951106 | 0.5247 | 0.9463 |
| 6:32681277 | 0.5248 | 0.954  |
| 6:30038647 | 0.5264 | 0.9317 |
| 6:30066097 | 0.5273 | 1.0533 |
| 6:32345514 | 0.5276 | 1.0505 |
| 6:29782868 | 0.5278 | 0.9553 |
| 6:32862740 | 0.5278 | 1.0704 |
| 6:29711747 | 0.5293 | 0.9267 |
| 6:31136832 | 0.5298 | 0.9564 |
| 6:31265314 | 0.5306 | 0.8832 |
| 6:29782027 | 0.5307 | 0.9465 |
| 6:30072511 | 0.5307 | 1.0489 |
| 6:31488879 | 0.531  | 0.9109 |
| 6:31127562 | 0.5313 | 1.0491 |
| 6:32199144 | 0.5314 | 0.9476 |
| 6:31475127 | 0.5316 | 1.0485 |
| 6:29973526 | 0.5318 | 0.8219 |
| 6:29992261 | 0.5325 | 0.9399 |
| 6:29711041 | 0.5343 | 0.8763 |
| 6:31079264 | 0.535  | 1.1091 |
| 6:29938455 | 0.5352 | 0.8235 |
| 6:29938487 | 0.5356 | 0.8227 |
| 6:31079242 | 0.5359 | 1.1136 |
| 6:32743103 | 0.536  | 0.8447 |
| 6:29938371 | 0.5361 | 0.8239 |
| 6:30285524 | 0.5362 | 1.1469 |
| 6:31522669 | 0.5365 | 0.9467 |
| 6:31078836 | 0.5368 | 1.1131 |



|            |        |        |
|------------|--------|--------|
| 6:31075481 | 0.5369 | 1.0428 |
| 6:31749142 | 0.5376 | 1.068  |
| 6:32649676 | 0.5376 | 0.9349 |
| 6:31622606 | 0.538  | 0.9577 |
| 6:31044863 | 0.5385 | 0.9191 |
| 6:32740442 | 0.5393 | 1.0436 |
| 6:32383441 | 0.5394 | 0.9455 |
| 6:30070937 | 0.5399 | 1.0476 |
| 6:31641139 | 0.5402 | 0.958  |
| 6:32367847 | 0.5402 | 1.0488 |
| 6:32218989 | 0.5403 | 0.9352 |
| 6:31609813 | 0.5405 | 0.9579 |
| 6:29713926 | 0.5408 | 0.9342 |
| 6:31136714 | 0.5411 | 0.9575 |
| 6:29818662 | 0.5412 | 1.096  |
| 6:32317276 | 0.5413 | 1.0862 |
| 6:31431691 | 0.5416 | 0.9248 |
| 6:29809194 | 0.5426 | 0.9306 |
| 6:32318036 | 0.5426 | 1.0857 |
| 6:30028800 | 0.5428 | 0.8358 |
| 6:31074128 | 0.5428 | 1.1098 |
| 6:31528951 | 0.543  | 0.9382 |
| 6:32406342 | 0.543  | 1.06   |
| 6:29935372 | 0.5433 | 0.9381 |
| 6:31052684 | 0.5446 | 0.9197 |
| 6:32219725 | 0.5446 | 0.9355 |
| 6:29718165 | 0.5454 | 0.9337 |
| 6:31001166 | 0.5457 | 1.0566 |
| 6:31388522 | 0.546  | 0.8306 |
| 6:32256418 | 0.5463 | 0.9511 |
| 6:31135706 | 0.5471 | 0.9581 |
| 6:31484561 | 0.5474 | 1.0461 |
| 6:31255286 | 0.5479 | 1.0411 |
| 6:32345183 | 0.5484 | 0.8768 |
| 6:29820586 | 0.5486 | 1.0914 |
| 6:30065298 | 0.5493 | 1.0492 |
| 6:31260218 | 0.5494 | 1.0409 |
| 6:29776360 | 0.5495 | 0.9581 |
| 6:31543101 | 0.5498 | 0.9089 |
| 6:31437566 | 0.55   | 0.8584 |
| 6:30005754 | 0.5501 | 0.8715 |

|            |        |        |
|------------|--------|--------|
| 6:30900664 | 0.5505 | 1.0381 |
| 6:31050244 | 0.5507 | 0.9223 |
| 6:32984788 | 0.5507 | 0.9192 |
| 6:33017457 | 0.5507 | 0.9525 |
| 6:31126944 | 0.5508 | 0.9605 |
| 6:32975381 | 0.5508 | 0.9387 |
| 6:30379965 | 0.5509 | 0.9467 |
| 6:29782470 | 0.5521 | 0.9577 |
| 6:31446466 | 0.5522 | 0.9592 |
| 6:31264302 | 0.5525 | 0.9527 |
| 6:31020152 | 0.5536 | 0.9312 |
| 6:31053741 | 0.5537 | 0.9202 |
| 6:29939544 | 0.5538 | 0.9357 |
| 6:30046848 | 0.5542 | 0.9065 |
| 6:31180642 | 0.5544 | 1.0604 |
| 6:31038593 | 0.5545 | 0.9258 |
| 6:32147696 | 0.5545 | 1.0541 |
| 6:30112408 | 0.5551 | 0.9182 |
| 6:31047160 | 0.5555 | 0.921  |
| 6:31051854 | 0.5558 | 0.9211 |
| 6:30006765 | 0.556  | 0.8499 |
| 6:30115542 | 0.5561 | 0.9138 |
| 6:31180055 | 0.5561 | 1.0601 |
| 6:31929014 | 0.5561 | 1.0453 |
| 6:29949821 | 0.5562 | 1.0712 |
| 6:32282854 | 0.5564 | 1.0517 |
| 6:32263458 | 0.5565 | 0.9467 |
| 6:31442137 | 0.557  | 1.0612 |
| 6:30389323 | 0.5571 | 0.9364 |
| 6:30008746 | 0.5578 | 0.8478 |
| 6:30115965 | 0.5578 | 0.9172 |
| 6:32804570 | 0.558  | 1.0429 |
| 6:30109412 | 0.5584 | 0.9159 |
| 6:31742067 | 0.5585 | 1.0423 |
| 6:30118360 | 0.5586 | 0.9197 |
| 6:29703823 | 0.5588 | 1.09   |
| 6:29778626 | 0.5588 | 0.959  |
| 6:30333505 | 0.5588 | 0.9396 |
| 6:32581253 | 0.559  | 0.9574 |
| 6:30154049 | 0.5591 | 1.0936 |
| 6:30065117 | 0.5595 | 0.8982 |

|            |        |        |
|------------|--------|--------|
| 6:31080859 | 0.5602 | 0.9287 |
| 6:31473286 | 0.5602 | 1.0449 |
| 6:29778109 | 0.5604 | 0.9592 |
| 6:32838664 | 0.5604 | 0.9247 |
| 6:32218681 | 0.5605 | 0.9366 |
| 6:32266535 | 0.5605 | 1.0796 |
| 6:31181025 | 0.5609 | 1.0593 |
| 6:30106296 | 0.5612 | 0.9177 |
| 6:31031381 | 0.5615 | 0.9265 |
| 6:31762311 | 0.562  | 0.878  |
| 6:32385605 | 0.562  | 0.948  |
| 6:31047471 | 0.5622 | 0.9239 |
| 6:30109482 | 0.5624 | 0.9187 |
| 6:30105349 | 0.5625 | 0.9186 |
| 6:30104480 | 0.5631 | 0.9191 |
| 6:32358144 | 0.5634 | 0.9231 |
| 6:30103745 | 0.5635 | 0.9192 |
| 6:30114955 | 0.5635 | 0.9171 |
| 6:30966282 | 0.5635 | 0.8801 |
| 6:29706691 | 0.5636 | 0.9027 |
| 6:31018546 | 0.5638 | 0.9319 |
| 6:32324945 | 0.5638 | 0.9503 |
| 6:30410206 | 0.5639 | 1.0483 |
| 6:32270500 | 0.5639 | 1.0792 |
| 6:29709234 | 0.5643 | 0.9343 |
| 6:31147194 | 0.5643 | 1.0454 |
| 6:31042608 | 0.5646 | 0.9267 |
| 6:31410408 | 0.5647 | 1.0604 |
| 6:29813942 | 0.565  | 0.9353 |
| 6:30032522 | 0.565  | 0.9378 |
| 6:32581190 | 0.5654 | 0.958  |
| 6:32837696 | 0.5655 | 0.9274 |
| 6:30740680 | 0.5657 | 0.95   |
| 6:31050179 | 0.5658 | 0.9243 |
| 6:32394313 | 0.5658 | 0.9492 |
| 6:30058988 | 0.566  | 1.0509 |
| 6:32284340 | 0.5665 | 0.948  |
| 6:32358163 | 0.5666 | 0.9235 |
| 6:30103898 | 0.5669 | 0.9197 |
| 6:29821982 | 0.5671 | 1.0885 |
| 6:32838949 | 0.5672 | 0.9284 |

|            |        |        |
|------------|--------|--------|
| 6:29704545 | 0.5677 | 1.0887 |
| 6:30026236 | 0.5677 | 1.0822 |
| 6:30121048 | 0.568  | 0.9181 |
| 6:30114666 | 0.5683 | 0.922  |
| 6:31344238 | 0.5684 | 1.06   |
| 6:31023148 | 0.5688 | 0.9294 |
| 6:31334945 | 0.569  | 0.9402 |
| 6:32195988 | 0.5692 | 0.9543 |
| 6:31048387 | 0.5693 | 0.9247 |
| 6:31048263 | 0.5694 | 0.9226 |
| 6:31170514 | 0.5698 | 1.0587 |
| 6:29701564 | 0.5699 | 0.9396 |
| 6:30034289 | 0.5699 | 1.0819 |
| 6:32218843 | 0.5699 | 0.9596 |
| 6:30045495 | 0.5701 | 0.9102 |
| 6:29721146 | 0.5702 | 0.9408 |
| 6:32840139 | 0.5707 | 0.9286 |
| 6:32843238 | 0.5711 | 0.9288 |
| 6:32266795 | 0.5712 | 0.9486 |
| 6:30966304 | 0.5713 | 0.8814 |
| 6:32835615 | 0.5714 | 0.9289 |
| 6:29708028 | 0.5718 | 1.0882 |
| 6:31172655 | 0.5722 | 1.0579 |
| 6:32054934 | 0.5722 | 1.1375 |
| 6:31023186 | 0.5723 | 0.9298 |
| 6:31032937 | 0.5723 | 0.9277 |
| 6:31038976 | 0.5723 | 0.9277 |
| 6:31042811 | 0.5723 | 0.9277 |
| 6:31029918 | 0.5728 | 0.9299 |
| 6:31336757 | 0.5728 | 0.923  |
| 6:30068472 | 0.5736 | 0.9017 |
| 6:29745726 | 0.5737 | 0.9601 |
| 6:30115063 | 0.5737 | 0.9171 |
| 6:31044468 | 0.5737 | 0.9282 |
| 6:31013085 | 0.5742 | 0.9651 |
| 6:30948421 | 0.5745 | 0.8692 |
| 6:31788479 | 0.5746 | 0.9156 |
| 6:32838584 | 0.5747 | 0.929  |
| 6:31566507 | 0.5748 | 1.1034 |
| 6:30958494 | 0.575  | 0.8816 |
| 6:30964393 | 0.575  | 0.8835 |

|            |        |        |
|------------|--------|--------|
| 6:30967202 | 0.5758 | 0.8822 |
| 6:31042306 | 0.5758 | 0.9281 |
| 6:31093914 | 0.5759 | 1.2244 |
| 6:31778272 | 0.5762 | 1.0511 |
| 6:32220685 | 0.5765 | 0.9602 |
| 6:30960267 | 0.577  | 0.8829 |
| 6:31016978 | 0.577  | 0.9335 |
| 6:31032387 | 0.577  | 0.9286 |
| 6:30057544 | 0.5772 | 0.9025 |
| 6:30118707 | 0.5773 | 0.9214 |
| 6:32802807 | 0.5777 | 1.0522 |
| 6:32379506 | 0.5781 | 1.2464 |
| 6:30978717 | 0.5784 | 0.9228 |
| 6:29937833 | 0.5785 | 1.04   |
| 6:30045491 | 0.5785 | 0.9121 |
| 6:30062257 | 0.5796 | 0.9031 |
| 6:31028920 | 0.5796 | 0.9305 |
| 6:31352631 | 0.5797 | 0.9624 |
| 6:30055377 | 0.5802 | 1.0455 |
| 6:31187075 | 0.5803 | 1.041  |
| 6:32862682 | 0.5812 | 1.067  |
| 6:30940945 | 0.5813 | 0.8861 |
| 6:30940302 | 0.5814 | 0.8861 |
| 6:31158689 | 0.5816 | 1.0563 |
| 6:30736402 | 0.5817 | 0.9519 |
| 6:30949430 | 0.5819 | 0.8739 |
| 6:32969457 | 0.5819 | 1.0365 |
| 6:31259338 | 0.5821 | 1.0838 |
| 6:30045882 | 0.5822 | 0.9129 |
| 6:29832332 | 0.5827 | 1.0635 |
| 6:30046292 | 0.583  | 0.913  |
| 6:32408497 | 0.5831 | 1.0615 |
| 6:30946148 | 0.5832 | 0.8855 |
| 6:31033509 | 0.5832 | 0.929  |
| 6:30118637 | 0.5833 | 0.9235 |
| 6:30941691 | 0.5833 | 0.8864 |
| 6:31005726 | 0.5833 | 1.0457 |
| 6:31256746 | 0.5834 | 1.0831 |
| 6:30047612 | 0.584  | 0.9133 |
| 6:32431558 | 0.584  | 1.145  |
| 6:31506210 | 0.5841 | 0.9628 |

|            |        |        |
|------------|--------|--------|
| 6:32841319 | 0.5843 | 0.9308 |
| 6:31451680 | 0.5846 | 0.9565 |
| 6:31914935 | 0.5848 | 1.0513 |
| 6:31267515 | 0.585  | 1.0384 |
| 6:30942929 | 0.5855 | 0.8868 |
| 6:30069795 | 0.586  | 1.0528 |
| 6:30972202 | 0.5865 | 0.8834 |
| 6:32838269 | 0.5865 | 0.9304 |
| 6:30976781 | 0.5866 | 0.8843 |
| 6:31031696 | 0.5868 | 0.9313 |
| 6:31036783 | 0.5868 | 0.9313 |
| 6:31037794 | 0.5868 | 0.9313 |
| 6:32785515 | 0.5868 | 0.9397 |
| 6:30978196 | 0.5869 | 0.8837 |
| 6:31039252 | 0.5869 | 0.9313 |
| 6:31041493 | 0.5869 | 0.9313 |
| 6:31263751 | 0.5869 | 0.9566 |
| 6:31032358 | 0.587  | 0.9314 |
| 6:31804610 | 0.587  | 0.9162 |
| 6:30734080 | 0.5871 | 0.9598 |
| 6:30947365 | 0.5872 | 0.8862 |
| 6:30941645 | 0.5874 | 0.8871 |
| 6:32387752 | 0.5874 | 0.9514 |
| 6:30940705 | 0.5875 | 0.8871 |
| 6:30941285 | 0.5875 | 0.8871 |
| 6:30943083 | 0.5875 | 0.8871 |
| 6:29703262 | 0.5876 | 0.9413 |
| 6:30267886 | 0.5878 | 0.9352 |
| 6:32973878 | 0.5884 | 0.9524 |
| 6:31111356 | 0.5889 | 0.8315 |
| 6:31173906 | 0.5897 | 1.0551 |
| 6:31174385 | 0.5897 | 1.0551 |
| 6:32338326 | 0.5898 | 1.1959 |
| 6:31171486 | 0.5899 | 1.0551 |
| 6:31026434 | 0.5904 | 0.9317 |
| 6:31106268 | 0.5904 | 1.0376 |
| 6:32865997 | 0.5904 | 0.9416 |
| 6:30956779 | 0.5905 | 0.8842 |
| 6:30670700 | 0.5906 | 1.0995 |
| 6:30975090 | 0.5906 | 0.8842 |
| 6:31679307 | 0.5906 | 1.0439 |

|            |        |        |
|------------|--------|--------|
| 6:29761522 | 0.5907 | 0.9623 |
| 6:32845873 | 0.5908 | 0.9215 |
| 6:29835999 | 0.5909 | 1.0742 |
| 6:30942387 | 0.5911 | 0.8877 |
| 6:29938932 | 0.5914 | 1.0867 |
| 6:32357339 | 0.5914 | 0.9348 |
| 6:31165527 | 0.5917 | 1.0548 |
| 6:30047174 | 0.5919 | 0.915  |
| 6:30260982 | 0.5923 | 0.9342 |
| 6:30975445 | 0.5926 | 0.8846 |
| 6:32973743 | 0.5926 | 0.9527 |
| 6:32583159 | 0.5927 | 0.9614 |
| 6:30414011 | 0.5929 | 1.0438 |
| 6:29806622 | 0.5936 | 0.9346 |
| 6:30681980 | 0.5936 | 1.0987 |
| 6:32359821 | 0.5938 | 1.2196 |
| 6:30078330 | 0.5943 | 1.0488 |
| 6:31464571 | 0.5944 | 1.041  |
| 6:30974995 | 0.5946 | 0.8849 |
| 6:30975224 | 0.5946 | 0.8849 |
| 6:30975440 | 0.5946 | 0.8849 |
| 6:31173096 | 0.5946 | 1.0544 |
| 6:29939852 | 0.5947 | 1.0847 |
| 6:30955929 | 0.5947 | 0.8856 |
| 6:30731633 | 0.5948 | 0.9606 |
| 6:30972471 | 0.5949 | 0.8851 |
| 6:31236250 | 0.5955 | 1.0727 |
| 6:29702510 | 0.5958 | 0.942  |
| 6:29705659 | 0.5958 | 0.942  |
| 6:29828880 | 0.5959 | 1.0742 |
| 6:30730960 | 0.5968 | 0.9608 |
| 6:31266335 | 0.597  | 1.08   |
| 6:32223258 | 0.5973 | 1.0431 |
| 6:31272818 | 0.5975 | 0.8744 |
| 6:29706277 | 0.5977 | 0.9396 |
| 6:31480923 | 0.5977 | 1.0441 |
| 6:31384431 | 0.5982 | 1.0937 |
| 6:32261771 | 0.5983 | 1.0744 |
| 6:30943539 | 0.5985 | 0.8889 |
| 6:30956215 | 0.5985 | 0.8856 |
| 6:29822174 | 0.5988 | 1.0724 |

|            |        |        |
|------------|--------|--------|
| 6:31043232 | 0.5995 | 0.9357 |
| 6:31255183 | 0.5998 | 1.0794 |
| 6:31259837 | 0.5998 | 1.0794 |
| 6:31260040 | 0.5998 | 1.0794 |
| 6:31261983 | 0.5998 | 1.0794 |
| 6:31176928 | 0.6006 | 1.0533 |
| 6:33053609 | 0.601  | 1.0809 |
| 6:33006338 | 0.6012 | 0.9467 |
| 6:30950589 | 0.6014 | 0.888  |
| 6:32368087 | 0.6014 | 1.0415 |
| 6:32386061 | 0.6024 | 0.9533 |
| 6:31600106 | 0.603  | 0.8791 |
| 6:31080704 | 0.6034 | 0.9057 |
| 6:30782002 | 0.6044 | 0.9418 |
| 6:32362075 | 0.6048 | 0.9275 |
| 6:31525184 | 0.6051 | 0.9648 |
| 6:32345131 | 0.6053 | 0.9277 |
| 6:31261137 | 0.6055 | 1.0781 |
| 6:31261492 | 0.6055 | 1.0781 |
| 6:33007752 | 0.6059 | 0.947  |
| 6:30734255 | 0.6061 | 1.058  |
| 6:31417191 | 0.6061 | 0.9643 |
| 6:29800142 | 0.6065 | 0.9364 |
| 6:32331998 | 0.6079 | 0.9563 |
| 6:32723917 | 0.6082 | 0.967  |
| 6:30067892 | 0.6096 | 1.0506 |
| 6:30079307 | 0.6097 | 1.0459 |
| 6:29932666 | 0.6099 | 1.0443 |
| 6:32384677 | 0.6099 | 0.9542 |
| 6:32385099 | 0.6099 | 0.9542 |
| 6:31675501 | 0.6105 | 1.0596 |
| 6:32586639 | 0.6108 | 0.9477 |
| 6:31260105 | 0.6111 | 1.0769 |
| 6:32385873 | 0.6115 | 0.9544 |
| 6:32385653 | 0.6118 | 0.9544 |
| 6:30054757 | 0.6122 | 1.0416 |
| 6:30757491 | 0.6127 | 0.959  |
| 6:31011013 | 0.6127 | 0.9685 |
| 6:30024677 | 0.6128 | 1.2049 |
| 6:31237354 | 0.6134 | 0.9211 |
| 6:32072211 | 0.6135 | 0.8785 |



|            |        |        |
|------------|--------|--------|
| 6:32409996 | 0.614  | 0.9028 |
| 6:32385782 | 0.6142 | 0.9547 |
| 6:30940032 | 0.6145 | 0.8932 |
| 6:32337630 | 0.6145 | 0.9047 |
| 6:30947042 | 0.6146 | 1.0681 |
| 6:30081334 | 0.6147 | 1.0453 |
| 6:31302525 | 0.6147 | 1.0422 |
| 6:31261514 | 0.6151 | 0.9242 |
| 6:30080274 | 0.6152 | 1.0454 |
| 6:30210807 | 0.6152 | 1.0636 |
| 6:31145116 | 0.6156 | 0.9669 |
| 6:32848566 | 0.6165 | 0.9324 |
| 6:31081052 | 0.6175 | 0.9504 |
| 6:32804217 | 0.6177 | 1.0325 |
| 6:32383858 | 0.6179 | 0.9552 |
| 6:32385470 | 0.6179 | 0.9552 |
| 6:32388308 | 0.6179 | 0.9552 |
| 6:29812834 | 0.6181 | 0.9393 |
| 6:29812454 | 0.6188 | 0.9395 |
| 6:32911418 | 0.6189 | 0.8962 |
| 6:32385573 | 0.619  | 0.9553 |
| 6:32387860 | 0.6199 | 0.9554 |
| 6:31807540 | 0.6219 | 1.0542 |
| 6:29812030 | 0.622  | 0.9397 |
| 6:31126790 | 0.6225 | 0.9688 |
| 6:32203537 | 0.6226 | 0.9609 |
| 6:32194339 | 0.6227 | 0.9602 |
| 6:30335350 | 0.6229 | 1.0438 |
| 6:30993590 | 0.6237 | 0.9603 |
| 6:31263587 | 0.6237 | 0.9609 |
| 6:31105310 | 0.6243 | 1.0435 |
| 6:31635710 | 0.6248 | 1.0408 |
| 6:31012466 | 0.625  | 0.9696 |
| 6:32978587 | 0.625  | 1.0621 |
| 6:31129616 | 0.6251 | 0.9659 |
| 6:31346599 | 0.6251 | 0.9504 |
| 6:32804219 | 0.6252 | 1.0318 |
| 6:32846570 | 0.6255 | 0.935  |
| 6:31512936 | 0.6264 | 0.8853 |
| 6:31347144 | 0.6266 | 0.965  |
| 6:31133509 | 0.6272 | 0.9638 |

|            |        |        |
|------------|--------|--------|
| 6:31302168 | 0.6278 | 1.0407 |
| 6:31255465 | 0.6281 | 1.0731 |
| 6:31302904 | 0.6284 | 1.0312 |
| 6:32317471 | 0.6289 | 1.0695 |
| 6:31136453 | 0.6291 | 0.9661 |
| 6:31446796 | 0.6291 | 0.9613 |
| 6:30078275 | 0.6293 | 1.0443 |
| 6:31506744 | 0.6299 | 1.0396 |
| 6:32987277 | 0.6307 | 0.9562 |
| 6:32193678 | 0.6308 | 0.9137 |
| 6:31130078 | 0.6319 | 0.9666 |
| 6:31130502 | 0.6324 | 0.9666 |
| 6:31453618 | 0.6326 | 1.0581 |
| 6:31132649 | 0.6327 | 0.9638 |
| 6:32358533 | 0.6331 | 0.9309 |
| 6:32362408 | 0.6331 | 0.9309 |
| 6:32986782 | 0.6335 | 0.9554 |
| 6:31846741 | 0.6337 | 1.0587 |
| 6:29967302 | 0.6338 | 1.0472 |
| 6:29978352 | 0.6344 | 0.8519 |
| 6:29933000 | 0.6346 | 1.0412 |
| 6:31496925 | 0.6346 | 1.0391 |
| 6:29940679 | 0.635  | 0.9433 |
| 6:32358459 | 0.6358 | 0.9312 |
| 6:31498497 | 0.6359 | 1.0389 |
| 6:32109979 | 0.636  | 1.0376 |
| 6:32361035 | 0.636  | 0.9313 |
| 6:32361613 | 0.636  | 0.9313 |
| 6:32362182 | 0.6369 | 0.9322 |
| 6:31100942 | 0.6374 | 1.0866 |
| 6:29829871 | 0.638  | 1.0643 |
| 6:30977205 | 0.6382 | 0.893  |
| 6:32953711 | 0.6383 | 1.0308 |
| 6:30679333 | 0.6387 | 1.0864 |
| 6:29830505 | 0.6388 | 1.0659 |
| 6:32301514 | 0.639  | 1.0709 |
| 6:32818678 | 0.639  | 1.0334 |
| 6:30769565 | 0.6402 | 0.9607 |
| 6:32354803 | 0.6406 | 0.8236 |
| 6:31352040 | 0.6409 | 1.0328 |
| 6:31266767 | 0.6414 | 1.0331 |

|            |        |        |
|------------|--------|--------|
| 6:31417396 | 0.6424 | 0.9584 |
| 6:32383410 | 0.6435 | 0.9583 |
| 6:29937580 | 0.6441 | 0.8307 |
| 6:32209861 | 0.6442 | 0.9663 |
| 6:32995962 | 0.6449 | 1.037  |
| 6:31259834 | 0.6464 | 1.0691 |
| 6:32383246 | 0.6468 | 0.9587 |
| 6:32310967 | 0.6471 | 1.067  |
| 6:32310684 | 0.6473 | 1.0673 |
| 6:29983538 | 0.6474 | 0.9532 |
| 6:32383307 | 0.6478 | 0.9588 |
| 6:32315557 | 0.6481 | 1.0669 |
| 6:32109938 | 0.6484 | 0.9567 |
| 6:32309864 | 0.6488 | 1.0668 |
| 6:31510933 | 0.649  | 0.9691 |
| 6:30938883 | 0.6491 | 1.0602 |
| 6:32905086 | 0.6495 | 0.8041 |
| 6:31488904 | 0.6497 | 1.0371 |
| 6:32291643 | 0.65   | 0.9649 |
| 6:32083175 | 0.6501 | 1.0351 |
| 6:32307137 | 0.6506 | 1.0665 |
| 6:32309352 | 0.6507 | 1.0668 |
| 6:32317127 | 0.6507 | 1.0665 |
| 6:32317215 | 0.6507 | 1.0665 |
| 6:31274693 | 0.6508 | 0.9128 |
| 6:32313461 | 0.651  | 1.0665 |
| 6:32968412 | 0.651  | 0.9336 |
| 6:32331824 | 0.6511 | 1.0665 |
| 6:32998729 | 0.652  | 0.9714 |
| 6:32313136 | 0.6521 | 1.0663 |
| 6:30405956 | 0.6523 | 1.0364 |
| 6:32330153 | 0.6524 | 1.0663 |
| 6:29940260 | 0.6527 | 1.0708 |
| 6:32312796 | 0.6529 | 1.0665 |
| 6:32313097 | 0.6531 | 1.0662 |
| 6:33005273 | 0.6532 | 1.0415 |
| 6:33049384 | 0.6532 | 0.8988 |
| 6:32314676 | 0.6543 | 1.066  |
| 6:33049309 | 0.6544 | 0.8994 |
| 6:30279130 | 0.6552 | 0.9522 |
| 6:31856070 | 0.6554 | 0.9664 |

|            |        |        |
|------------|--------|--------|
| 6:32331841 | 0.6554 | 1.0659 |
| 6:31314313 | 0.6558 | 1.0373 |
| 6:31315540 | 0.6558 | 1.0373 |
| 6:31328542 | 0.6571 | 1.0493 |
| 6:30697740 | 0.6577 | 0.9311 |
| 6:31446557 | 0.6577 | 1.055  |
| 6:30065575 | 0.6584 | 1.0508 |
| 6:32383208 | 0.6584 | 0.9601 |
| 6:32313143 | 0.6588 | 1.0654 |
| 6:30154199 | 0.6593 | 0.9707 |
| 6:32113980 | 0.6595 | 1.0342 |
| 6:33005208 | 0.6597 | 1.04   |
| 6:31448625 | 0.6601 | 0.9648 |
| 6:30511170 | 0.661  | 1.0404 |
| 6:32282033 | 0.661  | 1.0616 |
| 6:31314347 | 0.6614 | 1.0366 |
| 6:30080496 | 0.6616 | 1.0398 |
| 6:32362217 | 0.6618 | 0.9344 |
| 6:30015330 | 0.6619 | 0.9583 |
| 6:30808762 | 0.6622 | 0.9725 |
| 6:29731635 | 0.6623 | 0.9543 |
| 6:29938507 | 0.6623 | 0.8562 |
| 6:31122330 | 0.6624 | 0.8612 |
| 6:29698821 | 0.6637 | 1.0698 |
| 6:31336100 | 0.6637 | 1.0328 |
| 6:31453781 | 0.6639 | 0.8973 |
| 6:31269262 | 0.6644 | 1.0308 |
| 6:31803130 | 0.6644 | 0.9072 |
| 6:29961631 | 0.6646 | 0.9459 |
| 6:29963065 | 0.6646 | 1.0461 |
| 6:29707050 | 0.6647 | 0.9543 |
| 6:29975047 | 0.6649 | 0.9597 |
| 6:30006876 | 0.6649 | 0.9593 |
| 6:32689529 | 0.6649 | 1.073  |
| 6:29943035 | 0.6651 | 1.0374 |
| 6:33016033 | 0.6655 | 0.9526 |
| 6:32850850 | 0.6659 | 0.9377 |
| 6:31169933 | 0.6662 | 1.0437 |
| 6:31506624 | 0.6664 | 1.0352 |
| 6:31506854 | 0.6667 | 1.0352 |
| 6:33006869 | 0.6668 | 1.0395 |

|            |        |        |
|------------|--------|--------|
| 6:32741918 | 0.667  | 1.043  |
| 6:32336074 | 0.6674 | 1.0642 |
| 6:32295350 | 0.6677 | 1.0608 |
| 6:32304031 | 0.668  | 1.0607 |
| 6:32743000 | 0.668  | 1.0427 |
| 6:31269348 | 0.6681 | 0.9027 |
| 6:32299715 | 0.6684 | 1.0607 |
| 6:32744347 | 0.6684 | 1.0426 |
| 6:32299873 | 0.6691 | 1.0606 |
| 6:32768721 | 0.6692 | 1.0304 |
| 6:30155313 | 0.6693 | 0.9716 |
| 6:32302067 | 0.6693 | 1.0606 |
| 6:32301322 | 0.6695 | 1.0605 |
| 6:32244627 | 0.6697 | 0.9651 |
| 6:32245827 | 0.6697 | 0.9651 |
| 6:32354644 | 0.6698 | 1.0391 |
| 6:30769687 | 0.6699 | 0.9641 |
| 6:29973910 | 0.67   | 0.9613 |
| 6:30028831 | 0.6705 | 0.9564 |
| 6:32851507 | 0.6709 | 0.9396 |
| 6:33004387 | 0.6715 | 0.9521 |
| 6:32790059 | 0.6719 | 0.9019 |
| 6:32278266 | 0.672  | 1.0602 |
| 6:32305690 | 0.6722 | 1.0596 |
| 6:31447135 | 0.6723 | 0.966  |
| 6:31919578 | 0.6725 | 0.9718 |
| 6:31315425 | 0.6731 | 1.0353 |
| 6:32305370 | 0.6732 | 1.0594 |
| 6:32294992 | 0.6736 | 1.06   |
| 6:32844032 | 0.6739 | 1.0805 |
| 6:32849639 | 0.674  | 0.9407 |
| 6:29701476 | 0.6743 | 1.0935 |
| 6:30953105 | 0.6745 | 1.04   |
| 6:32682812 | 0.6748 | 0.9572 |
| 6:31300518 | 0.675  | 1.035  |
| 6:30011934 | 0.6753 | 0.9586 |
| 6:32985052 | 0.6756 | 0.9585 |
| 6:32261507 | 0.6759 | 0.9659 |
| 6:32713867 | 0.6759 | 0.9652 |
| 6:29730095 | 0.6766 | 0.9563 |
| 6:29937242 | 0.6766 | 0.9583 |

|            |        |        |
|------------|--------|--------|
| 6:32803840 | 0.6773 | 0.9746 |
| 6:32196313 | 0.6775 | 0.9665 |
| 6:31440309 | 0.6781 | 1.0287 |
| 6:32260350 | 0.6781 | 0.9661 |
| 6:30120912 | 0.6786 | 0.9443 |
| 6:30311932 | 0.6786 | 0.945  |
| 6:32260559 | 0.6789 | 1.0598 |
| 6:30121185 | 0.6792 | 0.9645 |
| 6:32980608 | 0.6795 | 0.9582 |
| 6:30157654 | 0.6798 | 0.9725 |
| 6:30116078 | 0.6809 | 1.0535 |
| 6:32787036 | 0.6825 | 0.9534 |
| 6:31504587 | 0.6826 | 1.0334 |
| 6:32561327 | 0.6827 | 0.9688 |
| 6:32808232 | 0.6828 | 1.0274 |
| 6:31170713 | 0.6829 | 0.9745 |
| 6:31777946 | 0.6832 | 0.9721 |
| 6:32848168 | 0.6837 | 0.9441 |
| 6:31020821 | 0.6838 | 1.0436 |
| 6:32194308 | 0.6839 | 0.9465 |
| 6:30575603 | 0.684  | 1.0272 |
| 6:33002354 | 0.6849 | 0.9542 |
| 6:31015182 | 0.685  | 0.9748 |
| 6:29732244 | 0.6864 | 1.0306 |
| 6:29950583 | 0.687  | 0.9497 |
| 6:32255410 | 0.6876 | 0.9672 |
| 6:31304135 | 0.6879 | 1.0258 |
| 6:30209802 | 0.6881 | 0.9732 |
| 6:30512505 | 0.6881 | 0.937  |
| 6:31438794 | 0.6887 | 0.951  |
| 6:31860337 | 0.6897 | 0.9702 |
| 6:30970970 | 0.6901 | 0.9283 |
| 6:33004287 | 0.6903 | 0.8879 |
| 6:32101762 | 0.6905 | 1.0306 |
| 6:29718544 | 0.6906 | 0.9521 |
| 6:31275174 | 0.6907 | 0.931  |
| 6:30719909 | 0.6908 | 1.0763 |
| 6:31499354 | 0.6909 | 1.0325 |
| 6:32336586 | 0.6909 | 1.0608 |
| 6:29941400 | 0.691  | 0.9545 |
| 6:31383848 | 0.6911 | 1.0382 |

|            |        |        |
|------------|--------|--------|
| 6:31502767 | 0.6912 | 1.0325 |
| 6:32844523 | 0.6912 | 0.9444 |
| 6:31315120 | 0.6913 | 0.9746 |
| 6:31318303 | 0.6915 | 1.0331 |
| 6:30203602 | 0.6919 | 0.9737 |
| 6:32804070 | 0.6921 | 0.7976 |
| 6:33001488 | 0.6921 | 1.0374 |
| 6:29717826 | 0.6922 | 0.9536 |
| 6:32681355 | 0.6922 | 1.0329 |
| 6:33005070 | 0.6929 | 0.8895 |
| 6:32814659 | 0.693  | 1.0383 |
| 6:32294712 | 0.6936 | 1.053  |
| 6:30713808 | 0.6937 | 0.9651 |
| 6:32281676 | 0.6942 | 0.9679 |
| 6:32915797 | 0.6944 | 0.9502 |
| 6:31448818 | 0.6946 | 1.0482 |
| 6:31497457 | 0.6952 | 1.032  |
| 6:32972642 | 0.6954 | 0.9384 |
| 6:31096575 | 0.6957 | 0.8976 |
| 6:32758394 | 0.6959 | 0.967  |
| 6:30142458 | 0.696  | 0.9737 |
| 6:32257337 | 0.6964 | 1.0564 |
| 6:29812559 | 0.6965 | 0.8486 |
| 6:32668946 | 0.6966 | 1.0412 |
| 6:32272327 | 0.697  | 0.9679 |
| 6:32235177 | 0.6972 | 0.9682 |
| 6:29731241 | 0.6974 | 0.9576 |
| 6:32279284 | 0.6987 | 0.9683 |
| 6:31497744 | 0.6988 | 1.0316 |
| 6:29698050 | 0.6997 | 0.9561 |
| 6:32916699 | 0.6999 | 1.03   |
| 6:32280344 | 0.7    | 0.9685 |
| 6:29720726 | 0.7003 | 1.0878 |
| 6:30714479 | 0.7004 | 1.025  |
| 6:32238680 | 0.7006 | 0.9686 |
| 6:32224139 | 0.7008 | 0.9686 |
| 6:29940750 | 0.7015 | 1.0653 |
| 6:30723781 | 0.7017 | 0.9608 |
| 6:32202597 | 0.7018 | 0.9562 |
| 6:30209493 | 0.702  | 0.9745 |
| 6:31119422 | 0.7025 | 1.0391 |

|            |        |        |
|------------|--------|--------|
| 6:31275163 | 0.7025 | 0.9328 |
| 6:32235096 | 0.7029 | 0.9688 |
| 6:29724147 | 0.703  | 0.9576 |
| 6:32811366 | 0.7031 | 1.0675 |
| 6:31172044 | 0.7038 | 0.9511 |
| 6:32315486 | 0.704  | 0.9334 |
| 6:31380449 | 0.7041 | 1.0247 |
| 6:29719561 | 0.7045 | 0.9556 |
| 6:30163955 | 0.7046 | 1.0318 |
| 6:31207692 | 0.7047 | 1.026  |
| 6:32268701 | 0.7049 | 0.969  |
| 6:32338695 | 0.7058 | 0.9698 |
| 6:32230608 | 0.7059 | 0.9691 |
| 6:32736936 | 0.7059 | 1.0453 |
| 6:32974843 | 0.7059 | 1.0323 |
| 6:31440497 | 0.7062 | 1.0261 |
| 6:29938258 | 0.7077 | 0.9572 |
| 6:32586134 | 0.7086 | 0.9622 |
| 6:32823257 | 0.7086 | 0.9451 |
| 6:32234512 | 0.7087 | 0.9695 |
| 6:31004521 | 0.7093 | 1.1435 |
| 6:31388214 | 0.7096 | 1.0252 |
| 6:32968276 | 0.7097 | 1.0248 |
| 6:31448653 | 0.7107 | 1.0455 |
| 6:31512799 | 0.7108 | 0.9552 |
| 6:30155131 | 0.7121 | 0.9754 |
| 6:31373810 | 0.7124 | 0.9232 |
| 6:32307382 | 0.7127 | 1.0578 |
| 6:33003065 | 0.7127 | 1.0358 |
| 6:30194531 | 0.7128 | 0.9755 |
| 6:32278792 | 0.7132 | 0.97   |
| 6:31368588 | 0.7152 | 0.9243 |
| 6:31347877 | 0.7154 | 0.9235 |
| 6:32333955 | 0.7154 | 1.0569 |
| 6:31176226 | 0.7155 | 1.0277 |
| 6:29782633 | 0.7159 | 0.9743 |
| 6:32825379 | 0.716  | 0.9469 |
| 6:31002013 | 0.7166 | 0.9716 |
| 6:31699573 | 0.7167 | 0.9322 |
| 6:32787570 | 0.7167 | 0.9401 |
| 6:29710726 | 0.7168 | 0.9618 |



|            |        |        |
|------------|--------|--------|
| 6:31106177 | 0.7174 | 0.9728 |
| 6:29833033 | 0.7183 | 0.9683 |
| 6:32945466 | 0.7183 | 0.9542 |
| 6:32273765 | 0.7186 | 0.9702 |
| 6:29694680 | 0.719  | 1.0507 |
| 6:32330695 | 0.7191 | 0.9655 |
| 6:31128552 | 0.7192 | 0.9722 |
| 6:32788707 | 0.7192 | 0.9401 |
| 6:31099577 | 0.7197 | 1.0433 |
| 6:31344098 | 0.7202 | 0.9242 |
| 6:31851354 | 0.7215 | 0.9414 |
| 6:32814975 | 0.7215 | 1.0357 |
| 6:31384479 | 0.7217 | 1.046  |
| 6:29928649 | 0.7218 | 0.9727 |
| 6:30894759 | 0.7224 | 1.0224 |
| 6:32975511 | 0.7224 | 0.9477 |
| 6:31020933 | 0.7226 | 1.031  |
| 6:32975014 | 0.7233 | 0.9702 |
| 6:30986835 | 0.7237 | 1.0235 |
| 6:31480906 | 0.7238 | 0.9754 |
| 6:30199512 | 0.7248 | 0.9765 |
| 6:31336628 | 0.7248 | 0.9239 |
| 6:32361694 | 0.7249 | 0.9496 |
| 6:30987010 | 0.7258 | 1.0469 |
| 6:31098832 | 0.7258 | 1.0334 |
| 6:30179026 | 0.7269 | 0.9767 |
| 6:30179152 | 0.7269 | 0.9767 |
| 6:32297337 | 0.7271 | 1.0525 |
| 6:30982858 | 0.7273 | 0.907  |
| 6:30846830 | 0.7277 | 0.9774 |
| 6:32176211 | 0.7277 | 1.0265 |
| 6:32585574 | 0.7278 | 0.964  |
| 6:29940106 | 0.7279 | 1.031  |
| 6:32199239 | 0.7279 | 0.9722 |
| 6:31410948 | 0.7281 | 1.0246 |
| 6:30986664 | 0.7282 | 1.0466 |
| 6:32358368 | 0.7289 | 0.9499 |
| 6:32778281 | 0.7293 | 1.0252 |
| 6:29913099 | 0.7296 | 0.9324 |
| 6:31265695 | 0.7299 | 1.052  |
| 6:31345535 | 0.73   | 0.9256 |

|            |        |        |
|------------|--------|--------|
| 6:31363489 | 0.7305 | 0.9273 |
| 6:32281360 | 0.7305 | 0.9716 |
| 6:30988017 | 0.7307 | 0.9077 |
| 6:33016887 | 0.7313 | 0.9769 |
| 6:30193513 | 0.7314 | 0.9771 |
| 6:30889260 | 0.7321 | 1.0216 |
| 6:31360389 | 0.7323 | 0.9265 |
| 6:32254654 | 0.7324 | 1.0515 |
| 6:32298372 | 0.7324 | 1.0517 |
| 6:30204526 | 0.7325 | 1.0285 |
| 6:31449327 | 0.7325 | 1.0307 |
| 6:30007493 | 0.7326 | 0.957  |
| 6:32197736 | 0.733  | 0.9729 |
| 6:32361223 | 0.7334 | 0.9507 |
| 6:31352830 | 0.735  | 0.9256 |
| 6:33039625 | 0.735  | 0.9767 |
| 6:31017334 | 0.7352 | 1.0326 |
| 6:29691303 | 0.7355 | 1.0446 |
| 6:32216236 | 0.7358 | 0.9644 |
| 6:32307260 | 0.7369 | 1.0479 |
| 6:32379239 | 0.737  | 0.9755 |
| 6:32361566 | 0.7377 | 0.9511 |
| 6:30194103 | 0.7379 | 0.9777 |
| 6:32277211 | 0.7387 | 0.9725 |
| 6:30181275 | 0.7391 | 0.9778 |
| 6:31352328 | 0.7392 | 0.9269 |
| 6:29939240 | 0.7393 | 1.024  |
| 6:31231989 | 0.7394 | 0.978  |
| 6:31615167 | 0.7394 | 1.062  |
| 6:30199067 | 0.7396 | 0.9778 |
| 6:29715997 | 0.7398 | 0.9637 |
| 6:30041708 | 0.7398 | 0.9675 |
| 6:32378866 | 0.7401 | 0.9758 |
| 6:32379101 | 0.7401 | 0.9758 |
| 6:31354344 | 0.7403 | 0.927  |
| 6:32379445 | 0.7406 | 0.9758 |
| 6:32680070 | 0.7407 | 1.0274 |
| 6:32378982 | 0.7409 | 0.9759 |
| 6:33008546 | 0.7416 | 0.9626 |
| 6:32911814 | 0.7423 | 1.0216 |
| 6:32334754 | 0.7427 | 0.9683 |

|            |        |        |
|------------|--------|--------|
| 6:30196855 | 0.7429 | 0.9781 |
| 6:31507447 | 0.743  | 0.9604 |
| 6:32377470 | 0.7431 | 0.9761 |
| 6:32377539 | 0.7431 | 0.9761 |
| 6:30979793 | 0.7437 | 1.0446 |
| 6:32378834 | 0.7438 | 0.9761 |
| 6:32289423 | 0.744  | 0.9471 |
| 6:31352748 | 0.7442 | 0.927  |
| 6:31753526 | 0.7447 | 0.9478 |
| 6:31234150 | 0.7449 | 0.9501 |
| 6:29929253 | 0.745  | 0.975  |
| 6:31344571 | 0.7457 | 0.9272 |
| 6:30837646 | 0.7464 | 0.979  |
| 6:32379047 | 0.7468 | 0.9764 |
| 6:30155108 | 0.7475 | 0.9785 |
| 6:33006222 | 0.7476 | 0.9782 |
| 6:30888161 | 0.748  | 1.0202 |
| 6:30983683 | 0.7488 | 1.044  |
| 6:32360955 | 0.749  | 0.9526 |
| 6:32361080 | 0.749  | 0.9526 |
| 6:32361525 | 0.749  | 0.9526 |
| 6:31364105 | 0.7491 | 0.9286 |
| 6:32357274 | 0.7491 | 0.9468 |
| 6:29931798 | 0.7494 | 0.9607 |
| 6:32950382 | 0.7499 | 0.9362 |
| 6:31266117 | 0.75   | 0.9629 |
| 6:29968275 | 0.7501 | 0.96   |
| 6:31334174 | 0.7502 | 0.9305 |
| 6:31369151 | 0.7502 | 0.9776 |
| 6:30025759 | 0.7509 | 0.9602 |
| 6:31461966 | 0.751  | 1.0222 |
| 6:31197293 | 0.7518 | 1.0236 |
| 6:32379011 | 0.7519 | 0.9769 |
| 6:29941431 | 0.7527 | 0.9007 |
| 6:31511705 | 0.7527 | 0.9619 |
| 6:30979933 | 0.7528 | 1.0448 |
| 6:31335507 | 0.753  | 0.9284 |
| 6:30890871 | 0.7532 | 1.0199 |
| 6:29696849 | 0.7536 | 1.0428 |
| 6:32282081 | 0.7537 | 0.9741 |
| 6:32777150 | 0.754  | 1.0222 |

|            |        |        |
|------------|--------|--------|
| 6:32777900 | 0.754  | 1.0222 |
| 6:32770808 | 0.7542 | 1.0222 |
| 6:31232125 | 0.7545 | 0.952  |
| 6:32769204 | 0.7545 | 1.0222 |
| 6:32376788 | 0.7546 | 1.023  |
| 6:32292084 | 0.7551 | 1.0428 |
| 6:32901351 | 0.7554 | 1.0292 |
| 6:30196313 | 0.7561 | 0.9793 |
| 6:33016087 | 0.7562 | 1.0205 |
| 6:30178287 | 0.7567 | 0.9793 |
| 6:32835994 | 0.7567 | 1.0559 |
| 6:32935361 | 0.7569 | 0.9446 |
| 6:31334852 | 0.7571 | 0.9766 |
| 6:32678999 | 0.7571 | 1.0237 |
| 6:32290954 | 0.7572 | 1.048  |
| 6:32303511 | 0.7577 | 1.0422 |
| 6:32816972 | 0.7578 | 1.044  |
| 6:29693499 | 0.7585 | 1.0417 |
| 6:32165444 | 0.7589 | 1.0296 |
| 6:31447588 | 0.7592 | 0.9754 |
| 6:32246156 | 0.7602 | 0.975  |
| 6:32301289 | 0.7602 | 1.0419 |
| 6:31018407 | 0.7604 | 1.0306 |
| 6:30166266 | 0.761  | 1.0252 |
| 6:29696245 | 0.7612 | 1.0414 |
| 6:32296780 | 0.7618 | 1.0417 |
| 6:29829986 | 0.7623 | 0.9504 |
| 6:30146650 | 0.7625 | 0.9798 |
| 6:32270875 | 0.7625 | 0.9751 |
| 6:32279622 | 0.7629 | 0.9751 |
| 6:31168494 | 0.7636 | 0.9812 |
| 6:29808814 | 0.7637 | 1.0415 |
| 6:30071330 | 0.7637 | 1.0226 |
| 6:32743217 | 0.7637 | 1.022  |
| 6:32411035 | 0.7639 | 1.0234 |
| 6:30145740 | 0.7646 | 0.98   |
| 6:30127805 | 0.7647 | 0.9666 |
| 6:31847012 | 0.765  | 0.979  |
| 6:31140445 | 0.7654 | 0.9442 |
| 6:32271807 | 0.7655 | 0.9754 |
| 6:30128949 | 0.7656 | 0.9669 |

|            |        |        |
|------------|--------|--------|
| 6:33016728 | 0.7675 | 1.0196 |
| 6:31198896 | 0.7689 | 1.0393 |
| 6:32799157 | 0.7689 | 0.9421 |
| 6:30294590 | 0.7692 | 0.9565 |
| 6:32765302 | 0.7696 | 1.0208 |
| 6:32990121 | 0.7697 | 1.0486 |
| 6:30344645 | 0.7699 | 0.97   |
| 6:31126232 | 0.7699 | 0.967  |
| 6:30175847 | 0.7708 | 0.9806 |
| 6:32935509 | 0.771  | 0.9478 |
| 6:32275194 | 0.7712 | 0.976  |
| 6:30046246 | 0.7713 | 0.9767 |
| 6:32021130 | 0.7714 | 0.9609 |
| 6:32365580 | 0.772  | 1.0264 |
| 6:30987211 | 0.7725 | 1.0192 |
| 6:31162520 | 0.7727 | 0.9819 |
| 6:32374595 | 0.7727 | 0.9727 |
| 6:30984404 | 0.7732 | 1.0407 |
| 6:32932987 | 0.7733 | 0.9484 |
| 6:32935751 | 0.7733 | 0.9484 |
| 6:32951161 | 0.7733 | 0.9484 |
| 6:31269154 | 0.7734 | 0.9683 |
| 6:31804729 | 0.7734 | 0.9614 |
| 6:32922908 | 0.7735 | 0.9825 |
| 6:32387809 | 0.7737 | 1.0245 |
| 6:32988588 | 0.7743 | 1.0407 |
| 6:32791299 | 0.7747 | 0.9523 |
| 6:29730530 | 0.7754 | 0.9657 |
| 6:29730546 | 0.7754 | 0.9657 |
| 6:31095801 | 0.7756 | 1.0226 |
| 6:29727023 | 0.776  | 0.9648 |
| 6:32783896 | 0.7763 | 1.0186 |
| 6:33020842 | 0.7763 | 1.027  |
| 6:31245911 | 0.7765 | 0.9566 |
| 6:31336349 | 0.778  | 1.0181 |
| 6:32272510 | 0.7782 | 0.9767 |
| 6:30174131 | 0.7783 | 1.0233 |
| 6:31815723 | 0.7783 | 0.9579 |
| 6:32974551 | 0.7787 | 0.959  |
| 6:30001770 | 0.7793 | 0.9646 |
| 6:30002860 | 0.7793 | 0.9646 |

|            |        |        |
|------------|--------|--------|
| 6:31167512 | 0.7794 | 0.9825 |
| 6:32325358 | 0.7801 | 0.973  |
| 6:33020168 | 0.7802 | 1.0305 |
| 6:31461089 | 0.7805 | 1.0189 |
| 6:33040138 | 0.7806 | 0.9371 |
| 6:31140615 | 0.7807 | 0.9495 |
| 6:32658079 | 0.7807 | 1.0291 |
| 6:31448862 | 0.781  | 1.0337 |
| 6:31508761 | 0.7814 | 1.0225 |
| 6:32959160 | 0.7816 | 0.9831 |
| 6:31204008 | 0.7817 | 1.0378 |
| 6:31087934 | 0.7818 | 1.0315 |
| 6:31088856 | 0.7818 | 1.0315 |
| 6:30991559 | 0.783  | 0.9526 |
| 6:32934983 | 0.7832 | 0.9506 |
| 6:30191587 | 0.7833 | 0.9816 |
| 6:31085882 | 0.7835 | 1.0313 |
| 6:32782605 | 0.7847 | 1.0284 |
| 6:31352459 | 0.7853 | 0.9421 |
| 6:32851937 | 0.7861 | 1.0541 |
| 6:29830074 | 0.7862 | 1.0421 |
| 6:30064702 | 0.7871 | 1.0379 |
| 6:32793523 | 0.7878 | 0.9561 |
| 6:32278635 | 0.7881 | 0.9653 |
| 6:30610499 | 0.7883 | 1.0573 |
| 6:32582678 | 0.7883 | 1.0212 |
| 6:29726423 | 0.7887 | 0.9675 |
| 6:30159854 | 0.7887 | 0.9821 |
| 6:31087908 | 0.7887 | 1.0307 |
| 6:29713768 | 0.7889 | 0.9664 |
| 6:30083182 | 0.7889 | 1.0251 |
| 6:29704316 | 0.7893 | 1.0302 |
| 6:31093587 | 0.7894 | 1.0212 |
| 6:31089125 | 0.7899 | 1.0306 |
| 6:29945949 | 0.79   | 0.9732 |
| 6:29709812 | 0.7903 | 1.0299 |
| 6:31448976 | 0.791  | 1.0306 |
| 6:29732302 | 0.7911 | 0.9677 |
| 6:31105633 | 0.7921 | 1.0202 |
| 6:30089280 | 0.7923 | 0.969  |
| 6:32813756 | 0.7925 | 1.0374 |

|            |        |        |
|------------|--------|--------|
| 6:30145083 | 0.7929 | 0.9825 |
| 6:32786917 | 0.7934 | 1.0213 |
| 6:31143511 | 0.7935 | 1.0167 |
| 6:30190640 | 0.7936 | 0.9825 |
| 6:29724745 | 0.7949 | 0.9682 |
| 6:29726015 | 0.7949 | 0.9682 |
| 6:31440082 | 0.7949 | 1.018  |
| 6:30171827 | 0.7951 | 1.0216 |
| 6:32962420 | 0.7954 | 0.9821 |
| 6:32776583 | 0.7955 | 1.0183 |
| 6:31837277 | 0.7958 | 1.0173 |
| 6:30202442 | 0.7961 | 0.9826 |
| 6:32813852 | 0.7964 | 1.0367 |
| 6:32813864 | 0.7964 | 1.0367 |
| 6:29702061 | 0.7965 | 1.0299 |
| 6:29912517 | 0.7965 | 1.036  |
| 6:29708222 | 0.7969 | 0.9683 |
| 6:30921882 | 0.7973 | 1.0182 |
| 6:32769926 | 0.7974 | 1.0191 |
| 6:29730642 | 0.7982 | 0.9683 |
| 6:30201955 | 0.7985 | 0.9829 |
| 6:32945625 | 0.7985 | 0.9539 |
| 6:31657413 | 0.8002 | 1.0195 |
| 6:29710963 | 0.8004 | 0.9688 |
| 6:30875603 | 0.8008 | 1.0447 |
| 6:29717980 | 0.8011 | 0.9689 |
| 6:29833541 | 0.802  | 1.0238 |
| 6:31097301 | 0.8023 | 1.0196 |
| 6:31244532 | 0.8023 | 0.9618 |
| 6:32769663 | 0.8024 | 1.0187 |
| 6:32785275 | 0.8024 | 0.9719 |
| 6:30068195 | 0.8026 | 1.035  |
| 6:30188199 | 0.8036 | 0.9833 |
| 6:31119589 | 0.8037 | 1.0209 |
| 6:31524851 | 0.8039 | 1.0196 |
| 6:32099817 | 0.8045 | 1.0188 |
| 6:29692562 | 0.8048 | 0.9736 |
| 6:32376882 | 0.8057 | 0.982  |
| 6:32376932 | 0.8057 | 0.982  |
| 6:29819077 | 0.8059 | 1.0308 |
| 6:31675765 | 0.8059 | 0.9778 |

|            |        |        |
|------------|--------|--------|
| 6:31894626 | 0.8062 | 1.0172 |
| 6:32998238 | 0.8062 | 0.9832 |
| 6:31838441 | 0.8065 | 1.0164 |
| 6:32212985 | 0.8084 | 1.0618 |
| 6:32299592 | 0.8085 | 0.9823 |
| 6:31220450 | 0.8087 | 0.982  |
| 6:31485354 | 0.8092 | 1.0185 |
| 6:32759448 | 0.8093 | 0.9669 |
| 6:31420500 | 0.8107 | 0.9846 |
| 6:32854706 | 0.8107 | 1.0435 |
| 6:32796480 | 0.8109 | 0.9593 |
| 6:31463208 | 0.8126 | 0.9832 |
| 6:30202429 | 0.8128 | 0.9841 |
| 6:32335433 | 0.8128 | 0.9771 |
| 6:30897774 | 0.8132 | 0.985  |
| 6:31095864 | 0.8135 | 1.0249 |
| 6:31640227 | 0.8137 | 0.9526 |
| 6:30030689 | 0.8139 | 1.0255 |
| 6:33037640 | 0.8142 | 0.9458 |
| 6:30187290 | 0.8144 | 0.9551 |
| 6:31301944 | 0.8148 | 0.9746 |
| 6:31112899 | 0.815  | 1.0168 |
| 6:30077967 | 0.8153 | 0.9737 |
| 6:32901934 | 0.8155 | 1.0218 |
| 6:31165566 | 0.8168 | 1.0305 |
| 6:32711178 | 0.8168 | 1.0355 |
| 6:32265528 | 0.8177 | 0.9698 |
| 6:30761734 | 0.8188 | 0.9831 |
| 6:32785035 | 0.8189 | 0.9743 |
| 6:32740895 | 0.819  | 0.9702 |
| 6:30877054 | 0.8191 | 0.9806 |
| 6:30932068 | 0.8191 | 0.9792 |
| 6:31736065 | 0.8195 | 0.9639 |
| 6:30865725 | 0.8199 | 0.9807 |
| 6:30899746 | 0.82   | 0.9807 |
| 6:31421112 | 0.82   | 1.0221 |
| 6:30895990 | 0.8202 | 0.9806 |
| 6:32042322 | 0.8203 | 1.0205 |
| 6:30924024 | 0.8204 | 1.016  |
| 6:32283494 | 0.8207 | 0.9813 |
| 6:33035771 | 0.8211 | 0.9464 |



|            |        |        |
|------------|--------|--------|
| 6:32358270 | 0.8223 | 1.021  |
| 6:32981555 | 0.8227 | 0.9415 |
| 6:32680576 | 0.8235 | 0.9749 |
| 6:29704379 | 0.8246 | 0.9717 |
| 6:29699253 | 0.8247 | 1.0493 |
| 6:31330411 | 0.8248 | 1.0142 |
| 6:32375374 | 0.8249 | 0.9831 |
| 6:30861225 | 0.825  | 0.9812 |
| 6:29706933 | 0.8251 | 0.9717 |
| 6:31463333 | 0.8254 | 0.9844 |
| 6:30882803 | 0.8259 | 1.0393 |
| 6:32680928 | 0.8259 | 0.9753 |
| 6:30079129 | 0.8261 | 1.0207 |
| 6:32785029 | 0.8262 | 0.9753 |
| 6:30728360 | 0.8274 | 0.984  |
| 6:31475486 | 0.8277 | 1.0159 |
| 6:32345283 | 0.8278 | 0.9477 |
| 6:32983260 | 0.8282 | 0.9436 |
| 6:32983584 | 0.8282 | 0.9436 |
| 6:31417872 | 0.8284 | 0.9862 |
| 6:32983904 | 0.8285 | 0.9437 |
| 6:31463926 | 0.8288 | 0.9847 |
| 6:32992424 | 0.8293 | 0.9431 |
| 6:33034166 | 0.8293 | 0.9497 |
| 6:32988293 | 0.8299 | 0.9443 |
| 6:29768503 | 0.8303 | 1.0386 |
| 6:33037611 | 0.8303 | 0.95   |
| 6:31054511 | 0.8314 | 1.0144 |
| 6:32978997 | 0.8323 | 0.9605 |
| 6:32342537 | 0.8327 | 1.0203 |
| 6:32989175 | 0.833  | 0.9449 |
| 6:33025884 | 0.8345 | 0.9516 |
| 6:31342484 | 0.8353 | 1.017  |
| 6:29988642 | 0.8357 | 0.9761 |
| 6:31464050 | 0.836  | 0.9853 |
| 6:31261196 | 0.8364 | 0.9766 |
| 6:33025440 | 0.8367 | 0.9524 |
| 6:33025469 | 0.8367 | 0.9524 |
| 6:32818236 | 0.837  | 1.0372 |
| 6:29815637 | 0.8371 | 1.0295 |
| 6:32820334 | 0.8376 | 1.0371 |

|            |        |        |
|------------|--------|--------|
| 6:31257625 | 0.8387 | 0.9765 |
| 6:29695713 | 0.8392 | 0.9666 |
| 6:31419387 | 0.8393 | 0.9871 |
| 6:32198056 | 0.8393 | 0.9837 |
| 6:32817033 | 0.8395 | 1.0367 |
| 6:31497399 | 0.84   | 1.0147 |
| 6:31083813 | 0.8403 | 1.0223 |
| 6:32238013 | 0.8405 | 0.9835 |
| 6:33035616 | 0.8409 | 0.9539 |
| 6:32742059 | 0.841  | 1.0146 |
| 6:31253878 | 0.8414 | 0.9767 |
| 6:31260397 | 0.8418 | 0.9768 |
| 6:30102184 | 0.8419 | 0.9786 |
| 6:31259579 | 0.8427 | 0.977  |
| 6:31259930 | 0.8427 | 0.977  |
| 6:31124849 | 0.8428 | 0.9875 |
| 6:31254088 | 0.8428 | 0.977  |
| 6:29777911 | 0.844  | 1.0272 |
| 6:30215592 | 0.8443 | 0.9868 |
| 6:32375424 | 0.8444 | 0.985  |
| 6:31147081 | 0.8454 | 1.0266 |
| 6:32816998 | 0.8455 | 1.0174 |
| 6:30666594 | 0.8458 | 0.9249 |
| 6:32769575 | 0.8461 | 1.0136 |
| 6:32046275 | 0.8463 | 0.9738 |
| 6:31418475 | 0.8486 | 0.9878 |
| 6:31261185 | 0.849  | 0.9781 |
| 6:29812578 | 0.8495 | 1.0264 |
| 6:31143694 | 0.8498 | 1.0121 |
| 6:32985199 | 0.8501 | 1.0159 |
| 6:32971108 | 0.8502 | 0.9669 |
| 6:30242171 | 0.8508 | 0.9713 |
| 6:31248568 | 0.8515 | 1.033  |
| 6:32952546 | 0.8522 | 0.9885 |
| 6:30036528 | 0.8528 | 1.0491 |
| 6:30698541 | 0.8528 | 0.9842 |
| 6:30859520 | 0.8537 | 0.9843 |
| 6:30796738 | 0.854  | 1.0218 |
| 6:31494738 | 0.854  | 0.9708 |
| 6:32818031 | 0.854  | 1.0332 |
| 6:29765087 | 0.8543 | 1.0225 |

|            |        |        |
|------------|--------|--------|
| 6:31475811 | 0.8543 | 1.0134 |
| 6:32819968 | 0.8543 | 1.0332 |
| 6:32820137 | 0.8546 | 1.0331 |
| 6:32375352 | 0.8557 | 0.9861 |
| 6:30657043 | 0.8558 | 0.9699 |
| 6:32815930 | 0.8563 | 1.0327 |
| 6:29793724 | 0.8568 | 1.0129 |
| 6:29913542 | 0.8572 | 1.0266 |
| 6:29728209 | 0.8573 | 0.976  |
| 6:32380262 | 0.8576 | 0.9869 |
| 6:31271220 | 0.8578 | 0.9774 |
| 6:29799103 | 0.8581 | 1.0246 |
| 6:29806107 | 0.8582 | 1.0242 |
| 6:31261276 | 0.8582 | 0.9798 |
| 6:30256936 | 0.8586 | 0.9855 |
| 6:30172513 | 0.859  | 1.0147 |
| 6:31196295 | 0.8591 | 1.0132 |
| 6:31088579 | 0.86   | 1.0199 |
| 6:31161210 | 0.8602 | 1.0243 |
| 6:31476134 | 0.8604 | 1.0128 |
| 6:32814902 | 0.8605 | 1.0317 |
| 6:31407247 | 0.8618 | 1.0119 |
| 6:32941214 | 0.8624 | 1.0178 |
| 6:31416156 | 0.8629 | 0.9889 |
| 6:31717692 | 0.8631 | 1.0154 |
| 6:32583405 | 0.8634 | 0.9823 |
| 6:31936057 | 0.864  | 1.0237 |
| 6:32914758 | 0.864  | 0.9689 |
| 6:31085269 | 0.8644 | 1.0194 |
| 6:32977315 | 0.8644 | 1.0318 |
| 6:31646398 | 0.8649 | 0.9839 |
| 6:31081434 | 0.8653 | 1.017  |
| 6:31377047 | 0.8653 | 0.9836 |
| 6:30882689 | 0.8656 | 1.0298 |
| 6:31199208 | 0.8657 | 1.0127 |
| 6:31270951 | 0.8658 | 0.9787 |
| 6:31030425 | 0.866  | 0.9747 |
| 6:32978328 | 0.8665 | 0.9702 |
| 6:32971708 | 0.8668 | 0.9831 |
| 6:31081635 | 0.8671 | 0.9821 |
| 6:31028345 | 0.8676 | 0.975  |

|            |        |        |
|------------|--------|--------|
| 6:32753682 | 0.8678 | 1.0121 |
| 6:32363816 | 0.8688 | 0.982  |
| 6:30169327 | 0.87   | 1.0136 |
| 6:31269382 | 0.8702 | 0.9794 |
| 6:31192192 | 0.8709 | 0.987  |
| 6:31475413 | 0.8711 | 1.0118 |
| 6:31346898 | 0.8718 | 0.9794 |
| 6:31273146 | 0.872  | 0.9796 |
| 6:31246703 | 0.8734 | 0.9766 |
| 6:31272553 | 0.8743 | 0.9614 |
| 6:30022578 | 0.8744 | 1.0171 |
| 6:31240479 | 0.8744 | 1.0278 |
| 6:29992737 | 0.8745 | 0.9801 |
| 6:30904535 | 0.8749 | 1.0281 |
| 6:31144429 | 0.8752 | 1.0101 |
| 6:31145702 | 0.8753 | 1.0101 |
| 6:31443844 | 0.8772 | 1.0178 |
| 6:31930351 | 0.8772 | 0.9747 |
| 6:32257566 | 0.8789 | 1.0222 |
| 6:32209963 | 0.879  | 1.0122 |
| 6:32029183 | 0.8803 | 0.9832 |
| 6:32750915 | 0.8807 | 0.9705 |
| 6:33012770 | 0.8821 | 0.9851 |
| 6:29937924 | 0.8823 | 1.0187 |
| 6:32741844 | 0.8823 | 0.9709 |
| 6:31025051 | 0.883  | 0.9756 |
| 6:32934441 | 0.8832 | 1.0091 |
| 6:32913246 | 0.8834 | 0.9825 |
| 6:30873886 | 0.8836 | 1.012  |
| 6:31047620 | 0.884  | 1.0095 |
| 6:32281889 | 0.8842 | 0.9879 |
| 6:31245736 | 0.8845 | 1.0098 |
| 6:32858780 | 0.8851 | 1.0153 |
| 6:30848253 | 0.8855 | 0.9883 |
| 6:30895680 | 0.8859 | 1.012  |
| 6:31173678 | 0.8865 | 1.0202 |
| 6:31726688 | 0.8869 | 0.9904 |
| 6:31407643 | 0.8875 | 1.0097 |
| 6:32936373 | 0.8876 | 1.0145 |
| 6:30832063 | 0.8878 | 0.991  |
| 6:32582796 | 0.8878 | 0.9855 |

|            |        |        |
|------------|--------|--------|
| 6:32857966 | 0.8884 | 1.0149 |
| 6:30041009 | 0.8897 | 0.9868 |
| 6:32859712 | 0.8897 | 1.0147 |
| 6:31331166 | 0.89   | 1.0113 |
| 6:32955976 | 0.8906 | 1.0084 |
| 6:31601735 | 0.8908 | 0.9788 |
| 6:30081246 | 0.8909 | 1.0129 |
| 6:32757396 | 0.8911 | 1.0099 |
| 6:29823027 | 0.8916 | 1.0174 |
| 6:32752577 | 0.8921 | 1.0098 |
| 6:32745324 | 0.8922 | 1.0098 |
| 6:32746920 | 0.8924 | 1.0098 |
| 6:32746984 | 0.8926 | 1.0098 |
| 6:30035089 | 0.8928 | 1.0146 |
| 6:32744145 | 0.8928 | 1.0098 |
| 6:29785235 | 0.8929 | 1.0111 |
| 6:32235895 | 0.893  | 0.9888 |
| 6:31510858 | 0.8931 | 1.0097 |
| 6:32279340 | 0.8939 | 0.9889 |
| 6:31602489 | 0.8945 | 0.9875 |
| 6:30079993 | 0.8951 | 1.0124 |
| 6:29805199 | 0.896  | 0.9811 |
| 6:32782582 | 0.8961 | 0.9907 |
| 6:30004052 | 0.8963 | 0.9876 |
| 6:30650318 | 0.8964 | 1.0185 |
| 6:31506691 | 0.8965 | 0.9886 |
| 6:29979579 | 0.8967 | 0.9877 |
| 6:29991867 | 0.8971 | 0.9851 |
| 6:29823606 | 0.8974 | 0.9819 |
| 6:32795032 | 0.8978 | 1.0139 |
| 6:29950140 | 0.8982 | 1.011  |
| 6:32345086 | 0.8982 | 0.9861 |
| 6:31917540 | 0.8983 | 1.0092 |
| 6:30347306 | 0.8985 | 1.0108 |
| 6:32752788 | 0.8985 | 1.0093 |
| 6:31245080 | 0.9007 | 1.0218 |
| 6:31490725 | 0.901  | 1.0092 |
| 6:32784620 | 0.9018 | 0.9912 |
| 6:29820717 | 0.9021 | 1.0159 |
| 6:31593265 | 0.9022 | 0.981  |
| 6:31476514 | 0.9025 | 1.0089 |

|            |        |        |
|------------|--------|--------|
| 6:31308630 | 0.9039 | 0.9884 |
| 6:30780936 | 0.9044 | 1.0112 |
| 6:29820278 | 0.9047 | 1.0206 |
| 6:31497975 | 0.9049 | 0.9878 |
| 6:31199573 | 0.9061 | 1.0149 |
| 6:29827390 | 0.9062 | 1.0087 |
| 6:32757158 | 0.9066 | 1.0085 |
| 6:29831052 | 0.9067 | 1.0086 |
| 6:29830411 | 0.9069 | 1.0086 |
| 6:31379109 | 0.9071 | 0.9919 |
| 6:32757453 | 0.9078 | 1.0084 |
| 6:31301098 | 0.9081 | 1.0106 |
| 6:30278112 | 0.9082 | 0.9854 |
| 6:30293483 | 0.9082 | 0.9854 |
| 6:30857542 | 0.9084 | 0.9907 |
| 6:30858254 | 0.9084 | 0.9907 |
| 6:31005139 | 0.9085 | 0.9926 |
| 6:30887972 | 0.9088 | 1.0096 |
| 6:29979797 | 0.9092 | 0.9873 |
| 6:31177915 | 0.9094 | 1.0162 |
| 6:30777321 | 0.9096 | 1.0106 |
| 6:31348516 | 0.9099 | 1.0082 |
| 6:30040810 | 0.9102 | 0.9893 |
| 6:32942302 | 0.9104 | 1.007  |
| 6:30781151 | 0.9107 | 1.0104 |
| 6:31382690 | 0.9112 | 0.9923 |
| 6:30224889 | 0.9114 | 0.9859 |
| 6:32657578 | 0.9116 | 1.0082 |
| 6:31206979 | 0.9122 | 0.9917 |
| 6:30855251 | 0.9126 | 0.9911 |
| 6:31892641 | 0.9126 | 1.0126 |
| 6:31883679 | 0.9128 | 1.0136 |
| 6:31568469 | 0.913  | 0.991  |
| 6:30039901 | 0.9131 | 0.9896 |
| 6:29831372 | 0.9135 | 1.008  |
| 6:29823994 | 0.9144 | 1.0141 |
| 6:29828493 | 0.9144 | 1.0141 |
| 6:30359293 | 0.9145 | 1.0091 |
| 6:32854052 | 0.9145 | 1.011  |
| 6:30903948 | 0.9146 | 0.9933 |
| 6:29823319 | 0.9147 | 1.0141 |

|            |        |        |
|------------|--------|--------|
| 6:29828886 | 0.9147 | 1.0141 |
| 6:29829577 | 0.9147 | 1.0141 |
| 6:32321004 | 0.9147 | 0.9896 |
| 6:30776621 | 0.915  | 1.0099 |
| 6:32747060 | 0.9155 | 1.0077 |
| 6:32057627 | 0.9164 | 1.0129 |
| 6:30781904 | 0.9166 | 1.0098 |
| 6:32224388 | 0.9168 | 1.0159 |
| 6:29824092 | 0.917  | 1.0137 |
| 6:31185977 | 0.9181 | 1.0141 |
| 6:29913137 | 0.9182 | 0.9873 |
| 6:30342753 | 0.9187 | 1.0104 |
| 6:31050348 | 0.9192 | 1.0075 |
| 6:32860752 | 0.9193 | 1.0107 |
| 6:32399286 | 0.9195 | 1.014  |
| 6:33014313 | 0.9195 | 0.9905 |
| 6:29828916 | 0.9198 | 1.0133 |
| 6:32784753 | 0.9198 | 0.9928 |
| 6:30766244 | 0.9199 | 0.9908 |
| 6:32784073 | 0.9199 | 0.9928 |
| 6:31300968 | 0.9201 | 1.0089 |
| 6:31813774 | 0.9202 | 1.0091 |
| 6:31082843 | 0.9204 | 0.9788 |
| 6:31340620 | 0.9205 | 1.009  |
| 6:31611840 | 0.9205 | 0.9906 |
| 6:30077135 | 0.9209 | 0.9899 |
| 6:31350704 | 0.9212 | 1.0072 |
| 6:30792270 | 0.9213 | 0.9912 |
| 6:32375695 | 0.9218 | 1.0076 |
| 6:31643399 | 0.9219 | 1.0075 |
| 6:31173933 | 0.9222 | 1.0092 |
| 6:31161229 | 0.9231 | 0.9922 |
| 6:29827788 | 0.9234 | 1.0128 |
| 6:31082361 | 0.9238 | 0.9792 |
| 6:32917544 | 0.9239 | 0.9905 |
| 6:31632686 | 0.9245 | 0.991  |
| 6:30081189 | 0.9249 | 1.0089 |
| 6:30896147 | 0.9256 | 1.0078 |
| 6:31141671 | 0.9256 | 1.0107 |
| 6:31145271 | 0.9262 | 1.0059 |
| 6:30778305 | 0.9265 | 1.0086 |

|            |        |        |
|------------|--------|--------|
| 6:30794644 | 0.9265 | 1.0086 |
| 6:30544401 | 0.9274 | 1.0115 |
| 6:32361111 | 0.9279 | 0.9901 |
| 6:31488145 | 0.9281 | 1.0066 |
| 6:30792235 | 0.9282 | 0.992  |
| 6:30211782 | 0.9283 | 1.006  |
| 6:30213924 | 0.9283 | 1.006  |
| 6:30795328 | 0.9288 | 1.0083 |
| 6:32968856 | 0.9291 | 1.0064 |
| 6:30248424 | 0.9295 | 0.9889 |
| 6:29945270 | 0.9296 | 0.9906 |
| 6:32323529 | 0.9298 | 1.0127 |
| 6:32238219 | 0.9299 | 0.9927 |
| 6:31141954 | 0.9305 | 1.01   |
| 6:32804909 | 0.9307 | 0.9942 |
| 6:30039845 | 0.9308 | 0.9917 |
| 6:31117695 | 0.931  | 0.99   |
| 6:30039662 | 0.9313 | 0.9918 |
| 6:32854697 | 0.9318 | 1.0086 |
| 6:32734829 | 0.9328 | 1.0088 |
| 6:31007590 | 0.9329 | 1.0055 |
| 6:31252396 | 0.9329 | 1.0106 |
| 6:30844260 | 0.933  | 0.9946 |
| 6:31236998 | 0.9331 | 1.0106 |
| 6:30870763 | 0.9335 | 0.9932 |
| 6:30987786 | 0.9337 | 0.9923 |
| 6:30767049 | 0.9346 | 1.0076 |
| 6:31379377 | 0.9349 | 0.9943 |
| 6:32375330 | 0.9353 | 0.9938 |
| 6:33034815 | 0.9355 | 1.008  |
| 6:31074030 | 0.9358 | 1.0052 |
| 6:29702709 | 0.936  | 1.0056 |
| 6:32582548 | 0.936  | 0.9941 |
| 6:32816700 | 0.9372 | 0.9929 |
| 6:29831008 | 0.9386 | 1.0104 |
| 6:32925692 | 0.9386 | 1.0048 |
| 6:32781776 | 0.9397 | 1.006  |
| 6:31350328 | 0.9402 | 0.9946 |
| 6:32855347 | 0.9408 | 1.0078 |
| 6:32581454 | 0.9412 | 0.9924 |
| 6:31240353 | 0.9416 | 1.0092 |



|            |        |        |
|------------|--------|--------|
| 6:30790481 | 0.9418 | 0.9935 |
| 6:32586782 | 0.9423 | 0.9925 |
| 6:32875323 | 0.9426 | 1.0083 |
| 6:32855624 | 0.9428 | 1.0075 |
| 6:32856482 | 0.9428 | 1.0075 |
| 6:30786339 | 0.943  | 1.0067 |
| 6:32879233 | 0.9431 | 1.0083 |
| 6:30789665 | 0.9434 | 1.0066 |
| 6:31339871 | 0.9436 | 1.0063 |
| 6:31346193 | 0.9438 | 1.0057 |
| 6:32820043 | 0.9444 | 1.0125 |
| 6:32855683 | 0.9449 | 1.0072 |
| 6:32968598 | 0.9452 | 1.0049 |
| 6:30209099 | 0.9455 | 1.0045 |
| 6:32970450 | 0.9459 | 0.9958 |
| 6:31062667 | 0.9461 | 1.0044 |
| 6:31384792 | 0.9463 | 0.9952 |
| 6:32326045 | 0.9466 | 1.0093 |
| 6:31265262 | 0.9468 | 0.9925 |
| 6:32381210 | 0.947  | 0.9951 |
| 6:32255594 | 0.9475 | 0.9945 |
| 6:31388601 | 0.9477 | 1.0108 |
| 6:31389839 | 0.9485 | 1.0105 |
| 6:32741742 | 0.9486 | 1.0047 |
| 6:30791533 | 0.9487 | 1.006  |
| 6:29918059 | 0.9489 | 1.009  |
| 6:31084170 | 0.9492 | 0.9891 |
| 6:31084639 | 0.9492 | 0.9891 |
| 6:31207920 | 0.9516 | 1.0078 |
| 6:32950511 | 0.9516 | 0.9932 |
| 6:29768917 | 0.9519 | 0.9957 |
| 6:31145839 | 0.9519 | 1.0039 |
| 6:32855275 | 0.9521 | 1.0063 |
| 6:30081742 | 0.9522 | 1.0118 |
| 6:31300414 | 0.9525 | 1.0049 |
| 6:31122482 | 0.9526 | 0.9953 |
| 6:32855366 | 0.9528 | 1.0062 |
| 6:30234991 | 0.953  | 1.0138 |
| 6:32906716 | 0.9534 | 0.9893 |
| 6:32908211 | 0.9534 | 0.9893 |
| 6:32679462 | 0.9535 | 1.0048 |

|            |        |        |
|------------|--------|--------|
| 6:30987176 | 0.9544 | 0.9945 |
| 6:30874165 | 0.9546 | 1.0046 |
| 6:32255269 | 0.9547 | 0.9952 |
| 6:32907502 | 0.9548 | 0.9896 |
| 6:32908266 | 0.9548 | 0.9896 |
| 6:32280182 | 0.9549 | 0.9953 |
| 6:31303131 | 0.955  | 1.0045 |
| 6:29942126 | 0.9555 | 1.0046 |
| 6:31085824 | 0.9555 | 0.9904 |
| 6:31272261 | 0.9557 | 1.0065 |
| 6:29700079 | 0.9558 | 1.0039 |
| 6:32277934 | 0.9558 | 0.9954 |
| 6:32354428 | 0.9558 | 0.9936 |
| 6:31121945 | 0.9559 | 0.9956 |
| 6:30790759 | 0.9569 | 0.9952 |
| 6:31698352 | 0.9569 | 0.9952 |
| 6:32257035 | 0.9571 | 0.9955 |
| 6:31257511 | 0.9574 | 1.007  |
| 6:29910663 | 0.9584 | 1.0074 |
| 6:31418124 | 0.9588 | 0.9967 |
| 6:31009055 | 0.959  | 0.9943 |
| 6:31081205 | 0.9591 | 1.0044 |
| 6:30792492 | 0.9594 | 1.0047 |
| 6:32592862 | 0.9594 | 0.9961 |
| 6:31265490 | 0.9595 | 1.0058 |
| 6:31058340 | 0.9597 | 0.9949 |
| 6:32909098 | 0.96   | 0.9908 |
| 6:31346937 | 0.961  | 0.9959 |
| 6:29746869 | 0.9616 | 1.0037 |
| 6:30905313 | 0.9621 | 1.0031 |
| 6:31410597 | 0.9624 | 0.9963 |
| 6:32321872 | 0.9632 | 0.9941 |
| 6:32321115 | 0.9633 | 0.9941 |
| 6:31117075 | 0.9634 | 1.0039 |
| 6:30328753 | 0.9635 | 0.9928 |
| 6:32333195 | 0.9639 | 0.9942 |
| 6:30987098 | 0.964  | 0.9956 |
| 6:29726046 | 0.9641 | 1.0082 |
| 6:31425033 | 0.9643 | 0.9971 |
| 6:31378510 | 0.9645 | 1.0069 |
| 6:31008818 | 0.9646 | 0.9971 |

|            |        |        |
|------------|--------|--------|
| 6:30793667 | 0.9648 | 1.0041 |
| 6:31112737 | 0.9648 | 1.0034 |
| 6:32327781 | 0.9651 | 0.9944 |
| 6:31419800 | 0.9654 | 1.0028 |
| 6:32592845 | 0.9655 | 0.9967 |
| 6:32328403 | 0.9656 | 0.9945 |
| 6:31509432 | 0.9662 | 0.9969 |
| 6:32052983 | 0.9666 | 0.9951 |
| 6:31085340 | 0.9667 | 1.0034 |
| 6:31320810 | 0.9669 | 0.995  |
| 6:30726939 | 0.9675 | 1.0037 |
| 6:32019769 | 0.9677 | 0.9955 |
| 6:30790807 | 0.9678 | 0.9964 |
| 6:29923351 | 0.968  | 1.0056 |
| 6:31409102 | 0.968  | 0.9972 |
| 6:32325707 | 0.9682 | 0.9952 |
| 6:31006092 | 0.9684 | 0.9974 |
| 6:30334994 | 0.9686 | 1.0033 |
| 6:32793981 | 0.9686 | 1.0032 |
| 6:31920873 | 0.9687 | 1.0081 |
| 6:31006855 | 0.9688 | 0.9975 |
| 6:31729359 | 0.9692 | 0.9972 |
| 6:30388701 | 0.9696 | 1.0028 |
| 6:30871185 | 0.9696 | 0.9969 |
| 6:31206920 | 0.9696 | 0.9971 |
| 6:31492025 | 0.9697 | 1.0028 |
| 6:32855458 | 0.9699 | 1.0039 |
| 6:31330546 | 0.9702 | 1.003  |
| 6:30875664 | 0.9706 | 0.997  |
| 6:30865115 | 0.971  | 0.997  |
| 6:30867666 | 0.971  | 0.997  |
| 6:30869593 | 0.971  | 0.997  |
| 6:32339076 | 0.971  | 0.9969 |
| 6:32731258 | 0.971  | 1.0039 |
| 6:31389809 | 0.9712 | 0.9974 |
| 6:29700183 | 0.9714 | 0.9938 |
| 6:31114182 | 0.9714 | 0.9975 |
| 6:31113842 | 0.9719 | 0.997  |
| 6:29700615 | 0.9721 | 0.9976 |
| 6:30792364 | 0.9724 | 0.9969 |
| 6:30871000 | 0.9724 | 0.9972 |

|            |        |        |
|------------|--------|--------|
| 6:32918124 | 0.973  | 0.9938 |
| 6:32893102 | 0.9731 | 1.0039 |
| 6:31935567 | 0.9732 | 1.0056 |
| 6:30792867 | 0.9735 | 0.9971 |
| 6:32350868 | 0.9736 | 0.9961 |
| 6:32900787 | 0.9741 | 0.9971 |
| 6:31510105 | 0.9742 | 1.0023 |
| 6:29742809 | 0.9747 | 0.9957 |
| 6:31843924 | 0.975  | 0.9978 |
| 6:32685865 | 0.9759 | 1.0035 |
| 6:29941943 | 0.9768 | 1.0024 |
| 6:30211660 | 0.9772 | 1.0019 |
| 6:30211755 | 0.9772 | 1.0019 |
| 6:31488191 | 0.9781 | 1.002  |
| 6:29730358 | 0.9787 | 0.9965 |
| 6:32928984 | 0.9787 | 0.9969 |
| 6:31390055 | 0.9788 | 0.9981 |
| 6:30791561 | 0.9791 | 0.9977 |
| 6:30788195 | 0.9796 | 0.9977 |
| 6:32911835 | 0.9796 | 0.9953 |
| 6:32911917 | 0.9796 | 0.9953 |
| 6:30035341 | 0.9797 | 0.9959 |
| 6:31425985 | 0.9798 | 1.0048 |
| 6:31416536 | 0.9799 | 1.0044 |
| 6:31008368 | 0.9805 | 0.9984 |
| 6:31100768 | 0.9805 | 0.9979 |
| 6:30433611 | 0.9812 | 1.0019 |
| 6:29705772 | 0.9819 | 1.0031 |
| 6:29771879 | 0.9827 | 0.9983 |
| 6:32757938 | 0.9833 | 1.0015 |
| 6:32736079 | 0.9837 | 1.0032 |
| 6:32363955 | 0.9838 | 0.9975 |
| 6:30213936 | 0.9846 | 1.0013 |
| 6:31492004 | 0.9848 | 1.0014 |
| 6:32732210 | 0.9852 | 1.0021 |
| 6:31428967 | 0.9854 | 0.998  |
| 6:31730568 | 0.9858 | 1.0025 |
| 6:32915852 | 0.9859 | 0.9968 |
| 6:31002616 | 0.986  | 0.9985 |
| 6:31491131 | 0.9863 | 1.0013 |
| 6:32210799 | 0.9872 | 1.0013 |

|            |        |        |
|------------|--------|--------|
| 6:31386019 | 0.9879 | 0.9976 |
| 6:30044827 | 0.9882 | 0.9987 |
| 6:32268080 | 0.9882 | 1.0012 |
| 6:32922459 | 0.9883 | 0.9985 |
| 6:31419042 | 0.9889 | 1.0009 |
| 6:31221299 | 0.9897 | 0.9984 |
| 6:32905853 | 0.9905 | 0.9978 |
| 6:31505480 | 0.9906 | 1.0013 |
| 6:32322393 | 0.9911 | 1.0015 |
| 6:30878769 | 0.9914 | 1.0009 |
| 6:29725452 | 0.9915 | 1.003  |
| 6:29699784 | 0.9918 | 0.9993 |
| 6:30875145 | 0.9919 | 0.9992 |
| 6:32977535 | 0.992  | 0.9989 |
| 6:31111400 | 0.9921 | 0.9984 |
| 6:32961104 | 0.9921 | 1.0008 |
| 6:32924061 | 0.9922 | 0.9989 |
| 6:31129310 | 0.9923 | 1.001  |
| 6:31944851 | 0.9923 | 1.0014 |
| 6:30936014 | 0.9927 | 0.9993 |
| 6:31118019 | 0.9929 | 0.9994 |
| 6:31417510 | 0.993  | 1.0016 |
| 6:32243155 | 0.9936 | 0.9993 |
| 6:31007081 | 0.9941 | 0.9994 |
| 6:30875622 | 0.9942 | 1.0006 |
| 6:30716719 | 0.9943 | 0.9988 |
| 6:31587938 | 0.9944 | 1.0007 |
| 6:31417647 | 0.9946 | 1.0012 |
| 6:32289594 | 0.9947 | 0.9992 |
| 6:30878919 | 0.9948 | 1.0005 |
| 6:30773314 | 0.9951 | 0.9995 |
| 6:32817130 | 0.9957 | 0.9994 |
| 6:30773239 | 0.9958 | 1.0005 |
| 6:32804881 | 0.9962 | 1.0003 |
| 6:30877202 | 0.9969 | 1.0003 |
| 6:30993499 | 0.9969 | 0.9997 |
| 6:30875280 | 0.997  | 1.0003 |
| 6:32905685 | 0.997  | 0.9993 |
| 6:32818774 | 0.9975 | 0.9996 |
| 6:31027516 | 0.9978 | 1.0004 |
| 6:31244068 | 0.9991 | 1.0001 |

|            |        |        |
|------------|--------|--------|
| 6:31247067 | 0.9996 | 1.0001 |
| 6:30763893 | 0.9997 | 1      |
| 6:31346445 | 0.9998 | 1      |

TABLE 1. STREGA reporting recommendations, extended from STROBE Statement

| Item                        | Item number | STROBE Guideline                                                                                                                                 | Extension for Genetic Association Studies (STREGA)                                                     |
|-----------------------------|-------------|--------------------------------------------------------------------------------------------------------------------------------------------------|--------------------------------------------------------------------------------------------------------|
| <b>Title and Abstract</b>   | 1           | (a) Indicate the study's design with a commonly used term in the title or the abstract. <b>Page 1, 4</b>                                         |                                                                                                        |
|                             |             | (b) Provide in the abstract an informative and balanced summary of what was done and what was found. <b>Page 4</b>                               |                                                                                                        |
| <b>Introduction</b>         |             |                                                                                                                                                  |                                                                                                        |
| <i>Background rationale</i> | 2           | Explain the scientific background and rationale for the investigation being reported. <b>Page 6</b>                                              |                                                                                                        |
| <i>Objectives</i>           | 3           | State specific objectives, including any pre-specified hypotheses.<br><b>Page 6</b>                                                              | <b>State if the study is the first report of a genetic association, a replication effort, or both.</b> |
| <b>Methods</b>              |             |                                                                                                                                                  |                                                                                                        |
| <i>Study design</i>         | 4           | Present key elements of study design early in the paper.<br><b>Pages 7-8</b>                                                                     |                                                                                                        |
| <i>Setting</i>              | 5           | Describe the setting, locations and relevant dates, including periods of recruitment, exposure, follow-up, and data collection. <b>Pages 7-8</b> |                                                                                                        |

| Item                | Item number | STROBE Guideline                                                                                                                                                                                                                                                                                                                                                                                                                                                                                                                                                                                                                                                                                                                                                   | Extension for Genetic Association Studies (STREGA)                                                                                                                                                                              |
|---------------------|-------------|--------------------------------------------------------------------------------------------------------------------------------------------------------------------------------------------------------------------------------------------------------------------------------------------------------------------------------------------------------------------------------------------------------------------------------------------------------------------------------------------------------------------------------------------------------------------------------------------------------------------------------------------------------------------------------------------------------------------------------------------------------------------|---------------------------------------------------------------------------------------------------------------------------------------------------------------------------------------------------------------------------------|
| <b>Appendix</b>     |             |                                                                                                                                                                                                                                                                                                                                                                                                                                                                                                                                                                                                                                                                                                                                                                    |                                                                                                                                                                                                                                 |
| <i>Participants</i> | 6           | <p>(a) <b>Cohort study</b> – Give the eligibility criteria, and the sources and methods of selection of participants. Describe methods of follow-up.</p> <p><b>Case-control study</b> – Give the eligibility criteria, and the sources and methods of case ascertainment and control selection. Give the rationale for the choice of cases and controls. <b>Pages 7-8; Appendix</b></p> <p><b>Cross-sectional study</b> – Give the eligibility criteria, and the sources and methods of selection of participants.</p> <hr/> <p>(b) <b>Cohort study</b> – For matched studies, give matching criteria and number of exposed and unexposed.</p> <p><b>Case-control study</b> – For matched studies, give matching criteria and the number of controls per case.</p> | <p><b><i>Give information on the criteria and methods for selection of subsets of participants from a larger study, when relevant.</i></b></p>                                                                                  |
| <i>Variables</i>    | 7           | <p>(a) Clearly define all outcomes, exposures, predictors, potential confounders, and effect modifiers. Give diagnostic criteria, if applicable.</p> <p><b>Pages 7-10; Appendix</b></p>                                                                                                                                                                                                                                                                                                                                                                                                                                                                                                                                                                            | <p><b><i>(b) Clearly define genetic exposures (genetic variants) using a widely-used nomenclature system. Identify variables likely to be associated with population stratification (confounding by ethnic origin).</i></b></p> |



| Item                            | Item number | STROBE Guideline                                                                                                                                                                                                                    | Extension for Genetic Association Studies (STREGA)                                                                                                                                                                                                                                                                                                                                                                                                                       |
|---------------------------------|-------------|-------------------------------------------------------------------------------------------------------------------------------------------------------------------------------------------------------------------------------------|--------------------------------------------------------------------------------------------------------------------------------------------------------------------------------------------------------------------------------------------------------------------------------------------------------------------------------------------------------------------------------------------------------------------------------------------------------------------------|
| <i>Data sources measurement</i> | 8*          | <p>(a) For each variable of interest, give sources of data and details of methods of assessment (measurement). Describe comparability of assessment methods if there is more than one group.</p> <p><b>Pages 7-10; Appendix</b></p> | <p><b>(b) Describe laboratory methods, including source and storage of DNA, genotyping methods and platforms (including the allele calling algorithm used, and its version), error rates and call rates. State the laboratory/centre where genotyping was done. Describe comparability of laboratory methods if there is more than one group. Specify whether genotypes were assigned using all of the data from the study simultaneously or in smaller batches.</b></p> |
| <i>Bias</i>                     | 9           | <p>(a) Describe any efforts to address potential sources of bias.</p> <p><b>Pages 9-10; Appendix</b></p>                                                                                                                            | <p><b>(b) For quantitative outcome variables, specify if any investigation of potential bias resulting from pharmacotherapy was undertaken. If relevant, describe the nature and magnitude of the potential bias, and explain what approach was used to deal</b></p>                                                                                                                                                                                                     |

| Item                          | Item number | STROBE Guideline                                                                                                                                                  | Extension for Genetic Association Studies (STREGA)                              |
|-------------------------------|-------------|-------------------------------------------------------------------------------------------------------------------------------------------------------------------|---------------------------------------------------------------------------------|
|                               |             |                                                                                                                                                                   | <i>with this.</i>                                                               |
| <i>Study size</i>             | 10          | Explain how the study size was arrived at. <b>Page 13</b>                                                                                                         |                                                                                 |
| <i>Quantitative variables</i> | 11          | Explain how quantitative variables were handled in the analyses. If applicable, describe which groupings were chosen, and why.<br><br><b>Pages 7-10; Appendix</b> | <b><i>If applicable, describe how effects of treatment were dealt with.</i></b> |
| <i>Statistical methods</i>    | 12          | (a) Describe all statistical methods, including those used to control for confounding. <b>Pages 9-10; Appendix</b>                                                | <b><i>State software version used and options (or settings) chosen.</i></b>     |
|                               |             | (b) Describe any methods used to examine subgroups and interactions.<br><br><b>Pages 9-10</b>                                                                     |                                                                                 |
|                               |             | (c) Explain how missing data were addressed.<br><br><b>Pages 9-10; Appendix</b>                                                                                   |                                                                                 |

| Item | STROBE Guideline                                                                                                                                                                                                                                                                                                                                                                                      | Extension for Genetic Association Studies (STREGA)                                                                         |
|------|-------------------------------------------------------------------------------------------------------------------------------------------------------------------------------------------------------------------------------------------------------------------------------------------------------------------------------------------------------------------------------------------------------|----------------------------------------------------------------------------------------------------------------------------|
|      | <p>(d) <b>Cohort study</b> – If applicable, explain how loss to follow-up was addressed.</p> <p><b>Case-control study</b> – If applicable, explain how matching of cases and controls was addressed. <b>Pages 10-11</b></p> <p><b>Cross-sectional study</b> – If applicable, describe analytical methods taking account of sampling strategy.</p> <hr/> <p>(e) Describe any sensitivity analyses.</p> |                                                                                                                            |
|      | <p><b>Pages 7-10; Appendix</b></p>                                                                                                                                                                                                                                                                                                                                                                    | <p><i>(f) State whether Hardy-Weinberg equilibrium was considered and, if so, how.</i></p>                                 |
|      | <p><b>Page 9; Appendix</b></p>                                                                                                                                                                                                                                                                                                                                                                        | <p><i>(g) Describe any methods used for inferring genotypes or haplotypes.</i></p>                                         |
|      | <p><b>Pages 9-10; Appendix</b></p>                                                                                                                                                                                                                                                                                                                                                                    | <p><i>(h) Describe any methods used to assess or address population stratification.</i></p>                                |
|      | <p><b>Page 10</b></p>                                                                                                                                                                                                                                                                                                                                                                                 | <p><i>(i) Describe any methods used to address multiple comparisons or to control risk of false positive findings.</i></p> |

| Item                    | Item number | STROBE Guideline                                                                                                                                                                                                                                                                                                                                                                                          | Extension for Genetic Association Studies (STREGA)                                                                                         |
|-------------------------|-------------|-----------------------------------------------------------------------------------------------------------------------------------------------------------------------------------------------------------------------------------------------------------------------------------------------------------------------------------------------------------------------------------------------------------|--------------------------------------------------------------------------------------------------------------------------------------------|
|                         |             | <b>Appendix</b>                                                                                                                                                                                                                                                                                                                                                                                           | <i>(j) Describe any methods used to address and correct for relatedness among subjects</i>                                                 |
| <b>Results</b>          |             |                                                                                                                                                                                                                                                                                                                                                                                                           |                                                                                                                                            |
| <i>Participants</i>     | 13*         | <p>(a) Report the numbers of individuals at each stage of the study – e.g., numbers potentially eligible, examined for eligibility, confirmed eligible, included in the study, completing follow-up, and analysed.</p> <p style="text-align: center;"><b>Pages 7-10; Appendix</b></p> <hr/> <p>(b) Give reasons for non-participation at each stage.</p> <hr/> <p>(c) Consider use of a flow diagram.</p> | <b><i>Report numbers of individuals in whom genotyping was attempted and numbers of individuals in whom genotyping was successful.</i></b> |
| <i>Descriptive data</i> | 14*         | <p>(a) Give characteristics of study participants (e.g., demographic, clinical, social) and information on exposures and potential confounders.</p> <p style="text-align: center;"><b>Table 1, Pages 10-11</b></p> <hr/> <p>(b) Indicate the number of participants with missing data for each variable of interest.</p>                                                                                  | <b><i>Consider giving information by genotype.</i></b>                                                                                     |

| Item                | Item number | STROBE Guideline                                                                                                                                                                                                                                                                                                 | Extension for Genetic Association Studies (STREGA)                                                                                                                                                                       |
|---------------------|-------------|------------------------------------------------------------------------------------------------------------------------------------------------------------------------------------------------------------------------------------------------------------------------------------------------------------------|--------------------------------------------------------------------------------------------------------------------------------------------------------------------------------------------------------------------------|
|                     |             | (c) <b>Cohort study</b> – Summarize follow-up time, e.g. average and total amount.                                                                                                                                                                                                                               |                                                                                                                                                                                                                          |
| <i>Outcome data</i> | 15 *        | <p><b>Cohort study</b>-Report numbers of outcome events or summary measures over time.</p> <hr/> <p><b>Case-control study</b> – Report numbers in each exposure category, or summary measures of exposure.</p> <hr/> <p><b>Cross-sectional study</b> – Report numbers of outcome events or summary measures.</p> | <p><b>Report outcomes (phenotypes) for each genotype category over time</b></p> <hr/> <p><b>Report numbers in each genotype category</b></p> <hr/> <p><b>Report outcomes (phenotypes) for each genotype category</b></p> |
| <i>Main results</i> | 16          | (a) Give unadjusted estimates and, if applicable, confounder-adjusted estimates and their precision (e.g., 95% confidence intervals). Make clear which confounders were adjusted for and why they were included. <b>Pages 10-13</b>                                                                              |                                                                                                                                                                                                                          |

| Item                  | Item number | STROBE Guideline                                                                                                               | Extension for Genetic Association Studies (STREGA)                                                                                |
|-----------------------|-------------|--------------------------------------------------------------------------------------------------------------------------------|-----------------------------------------------------------------------------------------------------------------------------------|
|                       |             | (b) Report category boundaries when continuous variables were categorized.                                                     |                                                                                                                                   |
|                       |             | (c) If relevant, consider translating estimates of relative risk into absolute risk for a meaningful time period.              |                                                                                                                                   |
|                       |             | <b>Pages 15; Table 3</b>                                                                                                       | <b><i>(d) Report results of any adjustments for multiple comparisons.</i></b>                                                     |
| <i>Other analyses</i> | 17          | <b>(a)</b> Report other analyses done – e.g., analyses of subgroups and interactions, and sensitivity analyses. <b>Page 14</b> |                                                                                                                                   |
|                       |             | <b>Pages 11-12</b>                                                                                                             | <b><i>(b) If numerous genetic exposures (genetic variants) were examined, summarize results from all analyses undertaken.</i></b> |
|                       |             | <b>Pages 11-12 (mentions supplemental data)</b>                                                                                | <b><i>(c) If detailed results are available elsewhere, state how they can be accessed.</i></b>                                    |
| <b>Discussion</b>     |             |                                                                                                                                |                                                                                                                                   |

| Item                     | Item number | STROBE Guideline                                                                                                                                                                                  | Extension for Genetic Association Studies (STREGA) |
|--------------------------|-------------|---------------------------------------------------------------------------------------------------------------------------------------------------------------------------------------------------|----------------------------------------------------|
| <i>Key results</i>       | 18          | Summarize key results with reference to study objectives.<br><b>Pages 12-13</b>                                                                                                                   |                                                    |
| <i>Limitations</i>       | 19          | Discuss limitations of the study, taking into account sources of potential bias or imprecision. Discuss both direction and magnitude of any potential bias. <b>Pages 15-16</b>                    |                                                    |
| <i>Interpretation</i>    | 20          | Give a cautious overall interpretation of results considering objectives, limitations, multiplicity of analyses, results from similar studies, and other relevant evidence.<br><b>Pages 15-16</b> |                                                    |
| <i>Generalizability</i>  | 21          | Discuss the generalizability (external validity) of the study results.<br><b>Pages 15-16</b>                                                                                                      |                                                    |
| <b>Other Information</b> |             |                                                                                                                                                                                                   |                                                    |
| <i>Funding</i>           | 22          | Give the source of funding and the role of the funders for the present study and, if applicable, for the original study on which the present article is based. <b>Page 23</b>                     |                                                    |

STREGA = STrengthening the REporting of Genetic Association studies; STROBE = STrengthening the Reporting of Observational Studies in Epidemiology.

\* Give information separately for cases and controls in case-control studies and, if applicable, for exposed and unexposed groups in cohort and cross-sectional studies.
